# Supplementary material
Source: PubMed Central journal article supplement (PMC4071545)
Supplement: rspb20140555supp1.pdf [file rspb20140555supp1.pdf]

# Electronic Supplementary Material

## Details of methodology and analyses

### (a) Literature search

We searched for relevant data on SciVerse Scopus database using the following series of related combinations of terms for herbivory:

*TITLE-ABS-KEY("rate\* of grazing" OR "grazing rate" OR "amount of grazing" OR "level\* of grazing" OR "grazing level\*" OR "rate\* of herbivor\*" OR "herbivor\* rate" OR "amount of herbivor\*" OR "herbivory level\*" OR "level\* of herbivory" OR "degree of herbivor\*" OR "rate\* of defoliat\*" OR "defoliat\* rate" OR "amount of defoliat\*" OR "defoliation level\*" OR "level\* of defoliation" OR "foli\* damage\*" OR "foli\* level\*" OR "level\* of foli\*" OR "leaf min\* damag\*" OR "leaf area remov\*" OR "leaf damage" OR "damage to lea\*" OR "percent leaf area" OR "leaf area damage" OR "removal of leaf" OR "leaf consumption" OR "consumption of leaves" OR "leaf herbivor\*" OR "canopy consumption" OR "consumption of canopy" OR "canopy damag\*" OR "canopy defoliation" OR "foliage damag\*" OR "foliage consum\*" OR "consumption of foliage" AND NOT \*plankton\* AND NOT alga\*) AND DOCTYPE(ar OR ip OR cp OR le OR no OR sh)*

\* Truncated words with all possible ending will be identified

### (b) Data selection criteria

In collecting data our aim was to obtain measurements of leaf herbivory that were comparable across all plant species and ecosystems. We therefore only retained data that was likely to represent the amount of natural herbivory that a typical leaf from a given species would experience

24 in a single year. We excluded studies or treatments within studies that added herbivores to plants.  
25 In order to conduct a phylogenetically explicit analysis we focused on species-level estimates.  
26 Finally, we excluded studies that only reported leaf herbivory during an outbreak year without  
27 baseline data because these extreme events do not represent natural herbivory rates unless  
28 corrected for frequency of occurrence. One caveat to our method is that our estimates of herbivory  
29 might be lower than historical averages if taxa that acted as major herbivores in the past recently  
30 went extinct. This might be especially true for some large grassland herbivores (e.g., Bison) and  
31 other megafauna (e.g., Moa, Woolly Mammoth and Giant Sloth), which were hunted to extinction  
32 or functionally removed from their native ecosystems. Even so, our estimates should accurately  
33 reflect modern rates of herbivory and the loss of these herbivores should not affect our ability to  
34 make inferences about evolutionary differences in herbivory and defence among plant lineages.

35 We focused on damage to leaf tissue for multiple reasons. First, leaf herbivory has strong  
36 impacts on individual plants and communities [1-3]. Studies show that even small amounts of leaf  
37 herbivory can reduce plant fitness [4, 5]. Although herbivory can cause variable impacts on plant  
38 growth, recent meta-analyses of experimental studies find that aboveground leaf herbivory  
39 frequently causes reduced plant growth, photosynthesis, and fitness compared to protected plants  
40 with effects as large as competition between plants [6, 7]. Leaf herbivory has also been shown to  
41 influence the evolution of defensive traits [8-10], plant population dynamics [3], species  
42 distributions and community composition [3, 11], and ecosystem productivity [12-14]. Second,  
43 quantifying leaf damage is easier and thus much more common than quantifying damage on roots,  
44 reproductive tissues, or damage caused by piercing herbivores [15, 16]. For example, damage  
45 caused by phloem feeders might only be apparent if one quantifies the loss of growth potential  
46 compared to undamaged plants. Third, leaf damage is easier to standardize across species since  
47 leaves are almost always present in the growing season, unlike some other tissues [e.g., flowers

48 and fruits; 17]. It is difficult to say whether damage to leaves is representative of other tissues  
49 because few studies have compared damage rates directly [18]. The few studies that have made  
50 such comparisons suggest that leaf herbivory is usually higher than root herbivory and similar to  
51 or lower than damage to flowers and fruits [17, 19]. Fourth, we focused on percent leaf area lost  
52 caused by chewing, grazing, leaf mining, and scraping but excluded damage due to galling,  
53 phloem and xylem feeding because quantifying tissue loss due to these processes is difficult to do  
54 across many species [15, 16, 20]. The study of herbivory at the scale we present here, both in  
55 phylogenetic breadth and number of species, is currently only possible using percent leaf area  
56 damage.

57 To effectively compare rates of leaf herbivory across species we collected estimates of  
58 annual percent damage. In deciduous species, the limited growing season limits leaf life-span to a  
59 single year and measures collected towards the end of the growing season accurately reflect annual  
60 rates of damage [20]. In evergreen species, leaves can survive for multiple years, which could  
61 cause an overestimation of annual damage. This is probably a minor effect because most damage  
62 to leaves occurs within their first year [21]. A more complex issue occurs in species that  
63 continually produce new leaves because annual rates of herbivory will depend on the rate of leaf  
64 production. This issue has motivated researchers to present herbivory as a daily rate of damage  
65 usually measured over several months with regular sampling [22, 23]. These values are not easily  
66 converted into annual leaf herbivory because rates of damage change with leaf age and season.  
67 One cannot simply sum daily rates of damage over a year, which can reach over 100% [22],  
68 without correcting for leaf production and [the number of leaf flushes; 24]. Given these  
69 limitations, our approach for this type of data was to estimate total herbivory received by a leaf  
70 during its lifetime, most of which occurs within its first year of growth as an estimate of the  
71 proportion of annual primary production consumed (see below).

72 The various methodologies used to measure percent leaf herbivory have received much  
73 attention [20-22, 25]. The two most common sampling approaches are: i) single measures of  
74 herbivory on standing leaves, and ii) the quantification of herbivory on marked leaves over an  
75 extended period of time. Both methods have potential shortcomings. Standing measures of  
76 herbivory can underestimate annual herbivory when completely consumed leaves are not  
77 measured [20, 22, 25-27]. The marking approach can overestimate damage when missing leaves  
78 are assumed to have been completely consumed when in fact some leaves might have been  
79 dropped by the plant after a smaller amount of damage [20, 28]. In addition, marking leaves can  
80 alter rates of herbivory because repeated human visitation can increase rates of herbivory for some  
81 species [29, 30].

82 We included data collected using both the standing and marked methods. This was justified  
83 because standing measures of leaf herbivory are the most commonly reported and often the only  
84 available data for most species. Furthermore, some authors do account for completely consumed  
85 leaves by looking for evidence of chewing damage on petioles [31-33]. Most studies however, do  
86 not explicitly state how they deal with missing leaves and others reveal that it was impossible to  
87 determine the cause of damage even with careful observation [20]. However, when both types of  
88 data were available, we used that from marked leaves, assuming the total damage received at the  
89 end of the sampling period as a measure of annual herbivory. Details of the studies included in the  
90 database, including habitat, location, climate, and sampling methodology, can be found in Turcotte  
91 et al. [34].

92 To account for potential methodological biases, we created two datasets of different stringency.  
93 In temperate systems, studies that reported herbivory at the end of the summer or fall were  
94 included in the stringent dataset whereas a less-stringent dataset also included measurements made  
95 in mid-summer (7 studies, data on 22 species). In tropical systems we excluded studies that

96 measured herbivory only during the first month of growth of new leaves. We did so because for  
97 most species this period represents an underestimate of annual herbivory; Coley and Barone [21]  
98 report that 68%, 47%, and 29% of damage occurs during leaf expansion of species found in  
99 tropical wet forests (shade-tolerant species), tropical wet forests (gap specialists), and tropical dry  
100 forests, respectively. For tropical systems, we only included data on mature leaves (standing or  
101 marked measures) in the stringent dataset. In the less stringent dataset we also included studies of  
102 young and old leaves, or of an unknown mixture of leaves (13 studies, 104 species), plus studies  
103 measuring herbivory on leaves that were two months old (2 studies, 22 species).

104 Leaf herbivory values were often extracted directly from figures using Web Plot Digitizer  
105 (<http://arohatgi.info/WebPlotDigitizer/>). We also took note when studies mentioned the main  
106 herbivores but few studies explicitly quantified herbivore visitation rates especially on different  
107 plant species. Of the studies that noted the type of damage, 45% report that insects are the main  
108 herbivores (32% Lepidoptera, 20% Coleoptera, and 6% Orthoptera), while 5% identify  
109 crustaceans, and 4% report vertebrates as the principal consumer. We acknowledge that our  
110 selection criteria might exclude the impact of certain herbivores, such as grassland grazers for  
111 which herbivory is not commonly studied by measuring percent leaf area damaged.

112

### 113 **(c) Phylogenetic inference**

114 We first created a backbone family-level phylogeny for the 161 families in the database using  
115 the Phylomatic v.3 online tool based on the APG megatree [<http://phylodiversity.net/phyloomatic>;  
116 35]. Species were then added to the tree as polytomies using currently accepted taxonomy [e.g.,  
117 36]. We resolved this tree to the species level based on published plastid *rbcL* sequence from  
118 NCBI's GenBank ([www.ncbi.nlm.nih.gov/genbank](http://www.ncbi.nlm.nih.gov/genbank)), which was available for 487 out of 1058

119 species. For another 202 species we were able to obtain sequence data from congeners (hereafter  
120 “placeholder” species).

121 We aligned sequences using BioEdit v.7.1.3 [37] and excluded sequences shorter than 500  
122 nucleotides. Using the family-level tree as a constraint we reconstructed phylogenetic relationships  
123 using maximum likelihood (ML) assuming a general time reversible model with 25 rate categories  
124 in RAxML v7.3.1 [38, 39]. We made the branch lengths of the tree proportional to time using  
125 Pathd8 v1.0 (<http://www2.math.su.se/PATHd8/>) and fossil calibrations (table S2). Finally, we  
126 generated a posterior distribution of dated trees using BEAST v1.7.4 [<http://beast.bio.ed.ac.uk>;  
127 40], using the ML topology as a constraint and allowing branch lengths to vary assuming a general  
128 time reversible model of DNA evolution, as selected as the best fit model by jModelTest v2.1.1  
129 [41]. We used a log-normal relaxed clock to estimate substitution rate variation and time calibrated  
130 the analysis using 19 fossil dates (table S2) as log-normal priors. We ran six BEAST analyses each  
131 lasting 33 to 72 million generations, where the first 8 to 15 million generations were discarded as  
132 burn-in. Each of the separate post-burn-in runs was then concatenated, and the maximum clade  
133 credibility values were extracted using TreeAnnotator. Phylogenetic inference was conducted on  
134 CIPRES ([www.phylo.org](http://www.phylo.org)).

135 Species for which no sequence data was available (367 species) were included as polytomies at  
136 the least inclusive node, mostly at the level of genus, although 27 species had to be added at their  
137 family node (the Nexus formatted script of the unresolved phylogeny is available as a  
138 supplementary material). We then resolved polytomies using a Bayesian approach that fits a birth-  
139 death diversification model, generating 1000 fully resolved trees [42].

140

#### 141 **(d) Phylogenetic comparative analysis**

142 We used phylogenetic comparative methods to analyse differences in leaf herbivory across  
143 plant taxa and to characterize the evolutionary model that best explained variation in herbivory  
144 across lineages of vascular plants. First, we assessed the fit of a Brownian Motion (BM) model of  
145 stochastic evolution (Equation 1);

$$146 \quad dX(t) = \sigma dB(t) \quad (1)$$

147 This equation describes the amount of change in trait ( $X$ ) over a short time period ( $t$ ). The term  
148 ( $dB(t)$ ) are normal random variables with a mean of zero and variance of ( $\sigma^2 dt$ ). The rate of  
149 stochastic evolution is thus ( $\sigma^2$ ) [43, 44]. Second, we compared the fit of the Hansen model [45, 46]  
150 that assumes an Ornstein-Uhlenbeck (OU) process in which traits evolve toward an evolutionary  
151 optimum in a way that is consistent with evolution by stabilizing selection, while genetic drift  
152 causes traits to evolve away from this optima in a stochastic manner [43, 44]. This model is  
153 represented by equation 2:

$$154 \quad dX(t) = \alpha [\theta - X(t)]dt + \sigma dB(t) \quad (2)$$

155 The additional term represents stabilizing selection, where ( $\alpha$ ) is the strength of selection  
156 pulling the trait value towards the optimum trait value ( $\theta$ ).

157 We compared the fit of alternative models using sample-size corrected Akaike information  
158 criteria (AICc) scores [47]. First we compared the fit of simple OU and BM models ('OU1' and  
159 'BM1') where all branches in the phylogeny had a fixed evolutionary optimum ( $\theta$ , OU1 model)  
160 and rate of stochastic evolution ( $\sigma^2$ , OU1 and BM1 models). Second, we allowed evolutionary  
161 parameters to vary with plant traits. Complex models assumed multiple rates of stochastic  
162 evolution (BMS) or multiple evolutionary optima (OUM) using the following trait categories: 1)  
163 life-history variation – annual, intermediate, and perennial, 2) woodiness – woody and non-woody,  
164 and 3) growth form – tree, vine, shrub, graminoid, and forb. Multi-optima and multi-rate models  
165 require information on expected trait values for each fitted clade. For this purpose, ancestral state

166 estimates were inferred from extant tip data using the *make.simmap* function in *phytools* package  
167 [48] in R [49] that simulates stochastic character mapping using a continuous-time reversible  
168 Markov chain process. More complex models, that permitted variation in ( $\sigma^2$ ), ( $\theta_i$ ), and ( $\alpha$ )  
169 simultaneously [44], would not convergence on stable ML estimates.

170 Analyses were conducted on natural log-transformed leaf herbivory rates ( $x + 1$ ) using the  
171 *OUwie* v.1.33 package [44] in R v.3.0 [49]. Because large differences in herbivory between major  
172 lineages, it was not possible to run complex models across the entire phylogeny, we thus analysed  
173 each major taxonomic group separately. Basal angiosperms, basal eudicots, and basal coreudicots  
174 were grouped into a single paraphyletic clade referred to as ‘other angiosperms’ since these  
175 species did not fit as monophyletic groupings with other major lineages (see Fig. 2B for the  
176 number of species within each lineage).

177



178 **Supplemental tables**

179 **Table S1.** Mean annual percent leaf tissue consumption as measured by four unpublished studies with taxonomic information and trait  
 180 data. Study (A): data collected by R.M. Godfrey in Trinidad in 2011. Study (B): collected M.T.J. Johnson and G.T. Broadhead in  
 181 Eastern U.S.A. in 2009. Study (C): collected by M.T.J. Johnson in Eastern Canada and U.S.A. in 2012. Study (D): collected by C.J.M.  
 182 Thomsen in Ontario Canada in 2012.

| <b>study</b> | <b>species</b>                | <b>synonym</b>               | <b>taxonomic lineage</b> | <b>woodiness</b> | <b>growth form</b> | <b>life-history</b> | <b>mean leaf damage (%)</b> |
|--------------|-------------------------------|------------------------------|--------------------------|------------------|--------------------|---------------------|-----------------------------|
| A            | <i>Asclepias curassavica</i>  |                              | Asterids                 | Non-Woody        | Shrub              | Perennial           | 0.80                        |
| A            | <i>Bidens pilosa</i>          |                              | Asterids                 | Non-Woody        | Forb               | Annual              | 0.40                        |
| A            | <i>Cassia fruticosa</i>       |                              | Rosids                   | Woody            | Tree               | Perennial           | 5.00                        |
| A            | <i>Chrysothemis pulchella</i> |                              | Asterids                 | Non-Woody        | Forb               | Perennial           | 2.17                        |
| A            | <i>Lantana camara</i>         |                              | Asterids                 | Woody            | Vine               | Perennial           | 5.58                        |
| A            | <i>Laurentia longiflora</i>   | <i>Hippobroma longiflora</i> | Asterids                 | Non-Woody        | Forb               | Perennial           | 0.20                        |

183 *Table continues on the next page*

184

| <b>study</b> | <b>species</b>                    | <b>synonym</b>                                       | <b>taxonomic lineage</b> | <b>woodiness</b> | <b>growth form</b> | <b>life-history</b> | <b>mean leaf damage (%)</b> |
|--------------|-----------------------------------|------------------------------------------------------|--------------------------|------------------|--------------------|---------------------|-----------------------------|
| A            | <i>Mimosa pudica</i>              |                                                      | Rosids                   | Non-Woody        | Forb               | Intermediate        | 2.27                        |
| A            | <i>Psiguria umbrosa</i>           | <i>Anguria umbrosa</i> ;<br><i>Citrullus umbrosa</i> | Rosids                   | Woody            | Vine               | Perennial           | 0.67                        |
| A            | <i>Spermacoce assurgens</i>       |                                                      | Asterids                 | Non-Woody        | Shrub              | Intermediate        | 2.20                        |
| A            | <i>Stachytarpheta jamaicensis</i> |                                                      | Asterids                 | Non-Woody        | Forb               | Intermediate        | 8.33                        |
| A            | <i>Trimezia martinicensis</i>     |                                                      | Monocots                 | Non-Woody        | Forb               | Perennial           | 0.20                        |
| B            | <i>Ambrosia artemisiifolia</i>    |                                                      | Asterids                 | Non-Woody        | Forb               | Annual              | 1.15                        |
| B            | <i>Aquilegia canadensis</i>       |                                                      | Other<br>Angiosperms     | Non-Woody        | Forb               | Perennial           | 1.43                        |
| B            | <i>Asclepias incarnata</i>        |                                                      | Asterids                 | Non-Woody        | Forb               | Perennial           | 0.88                        |
| B            | <i>Asclepias syriaca</i>          |                                                      | Asterids                 | Non-Woody        | Forb               | Perennial           | 2.68                        |
| B            | <i>Borrichia frutescens</i>       |                                                      | Asterids                 | Woody            | Shrub              | Perennial           | 0.54                        |

| <b>study</b> | <b>species</b>                 | <b>synonym</b> | <b>taxonomic lineage</b> | <b>woodiness</b> | <b>growth form</b> | <b>life-history</b> | <b>mean leaf damage (%)</b> |
|--------------|--------------------------------|----------------|--------------------------|------------------|--------------------|---------------------|-----------------------------|
| B            | <i>Campanula americanum</i>    |                | Asterids                 | Non-Woody        | Forb               | Annual              | 0.73                        |
| B            | <i>Capsella bursa-pastoris</i> |                | Rosids                   | Non-Woody        | Forb               | Annual              | 0.10                        |
| B            | <i>Carduus nutans</i>          |                | Asterids                 | Non-Woody        | Forb               | Perennial           | 7.05                        |
| B            | <i>Cassia fasciculata</i>      |                | Rosids                   | Non-Woody        | Forb               | Annual              | 3.19                        |
| B            | <i>Datura stramonium</i>       |                | Asterids                 | Non-Woody        | Forb               | Annual              | 0.24                        |
| B            | <i>Decodon verticillatus</i>   |                | Rosids                   | Woody            | Shrub              | Perennial           | 1.21                        |
| B            | <i>Erigeron annuus</i>         |                | Asterids                 | Non-Woody        | Forb               | Annual              | 2.39                        |
| B            | <i>Hordeum vulgare</i>         |                | Monocots                 | Non-Woody        | Graminoid          | Annual              | 0.00                        |
| B            | <i>Hypericum perforatum</i>    |                | Rosids                   | Non-Woody        | Forb               | Perennial           | 2.81                        |
| B            | <i>Impatiens capensis</i>      |                | Asterids                 | Non-Woody        | Forb               | Annual              | 2.01                        |
| B            | <i>Ipomoea hederacea</i>       |                | Asterids                 | Non-Woody        | Vine               | Annual              | 12.49                       |
| B            | <i>Ipomoea purpurea</i>        |                | Asterids                 | Non-Woody        | Vine               | Annual              | 3.94                        |

| <b>study</b> | <b>species</b>                 | <b>synonym</b> | <b>taxonomic lineage</b> | <b>woodiness</b> | <b>growth form</b> | <b>life-history</b> | <b>mean leaf damage (%)</b> |
|--------------|--------------------------------|----------------|--------------------------|------------------|--------------------|---------------------|-----------------------------|
| B            | <i>Juglans nigra</i>           |                | Rosids                   | Woody            | Tree               | Perennial           | 7.78                        |
| B            | <i>Kalmia latifolia</i>        |                | Asterids                 | Woody            | Shrub              | Perennial           | 1.81                        |
| B            | <i>Lathyrus latifolius</i>     |                | Rosids                   | Non-Woody        | Vine               | Perennial           | 0.91                        |
| B            | <i>Liriodendron tulipifera</i> |                | Magnoliids               | Woody            | Tree               | Perennial           | 3.90                        |
| B            | <i>Lobelia cardinalis</i>      |                | Asterids                 | Non-Woody        | Forb               | Perennial           | 1.13                        |
| B            | <i>Lolium multiflorum</i>      |                | Monocots                 | Non-Woody        | Graminoid          | Annual              | 0.07                        |
| B            | <i>Mimulus ringens</i>         |                | Asterids                 | Non-Woody        | Forb               | Perennial           | 1.55                        |
| B            | <i>Oenothera biennis</i>       |                | Rosids                   | Non-Woody        | Forb               | Intermediate        | 6.29                        |
| B            | <i>Oenothera humifusa</i>      |                | Rosids                   | Non-Woody        | Forb               | Perennial           | 1.10                        |
| B            | <i>Oenothera laciniata</i>     |                | Rosids                   | Non-Woody        | Forb               | Annual              | 0.56                        |
| B            | <i>Phlox drummondii</i>        |                | Asterids                 | Non-Woody        | Forb               | Annual              | 0.07                        |
| B            | <i>Picea rubens</i>            |                | Gymnosperms              | Woody            | Tree               | Perennial           | 0.00                        |

| <b>study</b> | <b>species</b>                    | <b>synonym</b> | <b>taxonomic lineage</b> | <b>woodiness</b> | <b>growth form</b> | <b>life-history</b> | <b>mean leaf damage (%)</b> |
|--------------|-----------------------------------|----------------|--------------------------|------------------|--------------------|---------------------|-----------------------------|
| B            | <i>Polystichum acrostichoides</i> |                | Ferns                    | Non-Woody        | Forb               | Perennial           | 2.31                        |
| B            | <i>Rhus glabra</i>                |                | Rosids                   | Woody            | Shrub              | Perennial           | 4.55                        |
| B            | <i>Rhus typhina</i>               |                | Rosids                   | Woody            | Shrub              | Perennial           | 0.75                        |
| B            | <i>Robinia pseudoacacia</i>       |                | Rosids                   | Woody            | Tree               | Perennial           | 7.34                        |
| B            | <i>Rumex acetosella</i>           |                | Other<br>Angiosperms     | Non-Woody        | Forb               | Perennial           | 3.23                        |
| B            | <i>Rumex hastatulus</i>           |                | Other<br>Angiosperms     | Non-Woody        | Forb               | Perennial           | 1.82                        |
| B            | <i>Sabatia angularis</i>          |                | Asterids                 | Non-Woody        | Forb               | Annual              | 4.08                        |
| B            | <i>Senecio vulgaris</i>           |                | Asterids                 | Non-Woody        | Forb               | Annual              | 2.44                        |
| B            | <i>Solanum carolinense</i>        |                | Asterids                 | Non-Woody        | Forb               | Perennial           | 3.05                        |
| B            | <i>Solanum ptychanthum</i>        |                | Asterids                 | Non-Woody        | Forb               | Annual              | 8.86                        |

193 **Table S1** continued

| study | species                      | synonym                    | taxonomic lineage | woodiness | growth form | life-history | mean leaf damage (%) |
|-------|------------------------------|----------------------------|-------------------|-----------|-------------|--------------|----------------------|
| B     | <i>Solidago sempervirens</i> |                            | Asterids          | Non-Woody | Forb        | Perennial    | 1.62                 |
| B     | <i>Spartina alterniflora</i> |                            | Monocots          | Non-Woody | Graminoid   | Perennial    | 0.04                 |
| B     | <i>Taraxacum officinale</i>  |                            | Asterids          | Non-Woody | Forb        | Annual       | 1.58                 |
| B     | <i>Trillium erectum</i>      |                            | Monocots          | Non-Woody | Forb        | Perennial    | 5.23                 |
| B     | <i>Trillium grandiflorum</i> |                            | Monocots          | Non-Woody | Forb        | Perennial    | 0.00                 |
| B     | <i>Lorinseria areolata</i>   | <i>Woodwardia areolata</i> | Ferns             | Non-Woody | Forb        | Perennial    | 1.70                 |
| B     | <i>Yucca filamentosa</i>     |                            | Monocots          | Woody     | Shrub       | Perennial    | 0.11                 |
| C     | <i>Abies balsamea</i>        | <i>Abies balsamifera</i>   | Gymnosperms       | Woody     | Tree        | Perennial    | 3.40                 |
| C     | <i>Asplenium platyneuron</i> |                            | Ferns             | Non-Woody | Forb        | Perennial    | 2.28                 |
| C     | <i>Brasenia schreberi</i>    |                            | Other Angiosperms | Non-Woody | Forb        | Perennial    | 2.36                 |

194

*Table continues on the next page*

| <b>study</b> | <b>species</b>                 | <b>synonym</b> | <b>taxonomic lineage</b> | <b>woodiness</b> | <b>growth form</b> | <b>life-history</b> | <b>mean leaf damage (%)</b> |
|--------------|--------------------------------|----------------|--------------------------|------------------|--------------------|---------------------|-----------------------------|
| C            | <i>Cystopteris fragilis</i>    |                | Ferns                    | Non-Woody        | Forb               | Perennial           | 6.90                        |
| C            | <i>Gymnocarpium dryopteris</i> |                | Ferns                    | Non-Woody        | Forb               | Perennial           | 4.85                        |
| C            | <i>Juniperus communis</i>      |                | Gymnosperms              | Woody            | Tree               | Perennial           | 0.30                        |
| C            | <i>Larix americana</i>         |                | Gymnosperms              | Woody            | Tree               | Perennial           | 6.52                        |
| C            | <i>Nuphar variegatum</i>       |                | Other<br>Angiosperms     | Non-Woody        | Forb               | Perennial           | 6.03                        |
| C            | <i>Nymphaea odorata</i>        |                | Other<br>Angiosperms     | Non-Woody        | Forb               | Perennial           | 9.77                        |
| C            | <i>Osmunda claytoniana</i>     |                | Ferns                    | Non-Woody        | Forb               | Perennial           | 1.30                        |
| C            | <i>Phegopteris connectilis</i> |                | Ferns                    | Non-Woody        | Forb               | Perennial           | 11.55                       |
| C            | <i>Phegopteris dryopteris</i>  |                | Ferns                    | Non-Woody        | Forb               | Perennial           | 1.97                        |
| C            | <i>Picea glauca</i>            |                | Gymnosperms              | Woody            | Tree               | Perennial           | 2.03                        |

| <b>study</b> | <b>species</b>                | <b>synonym</b> | <b>taxonomic lineage</b> | <b>woodiness</b> | <b>growth form</b> | <b>life-history</b> | <b>mean leaf damage (%)</b> |
|--------------|-------------------------------|----------------|--------------------------|------------------|--------------------|---------------------|-----------------------------|
| C            | <i>Picea mariana</i>          |                | Gymnosperms              | Woody            | Tree               | Perennial           | 0.00                        |
| C            | <i>Pinus banksiana</i>        |                | Gymnosperms              | Woody            | Tree               | Perennial           | 0.60                        |
| C            | <i>Pinus resinosa</i>         |                | Gymnosperms              | Woody            | Tree               | Perennial           | 4.27                        |
| C            | <i>Polypodium virginianum</i> |                | Ferns                    | Non-Woody        | Forb               | Perennial           | 0.74                        |
| C            | <i>Taxus canadensis</i>       |                | Gymnosperms              | Woody            | Shrub              | Perennial           | 0.04                        |
| C            | <i>Thuja occidentalis</i>     |                | Gymnosperms              | Woody            | Tree               | Perennial           | 1.91                        |
| D            | <i>Larix laricina</i>         |                | Gymnosperms              | Woody            | Tree               | Perennial           | 0.60                        |
| D            | <i>Picea abies</i>            |                | Gymnosperms              | Woody            | Tree               | Perennial           | 0.06                        |
| D            | <i>Pinus strobus</i>          |                | Gymnosperms              | Woody            | Tree               | Perennial           | 0.28                        |
| D            | <i>Pontederia cordata</i>     |                | Monocots                 | Non-Woody        | Forb               | Perennial           | 1.88                        |
| D            | <i>Sagittaria latifolia</i>   |                | Monocots                 | Non-Woody        | Forb               | Perennial           | 1.01                        |
| D            | <i>Tsuga canadensis</i>       |                | Gymnosperms              | Woody            | Tree               | Perennial           | 0.88                        |



199 **Table S2.** Nineteen fossil ages modelled as log-normal priors. Means of priors were set to 0 with a  
200 standard error of 1 and an offset value as listed in the table [dates were gathered from 50, 51].

| <b>node</b>    | <b>year (mya)</b> | <b>node</b>  | <b>year (mya)</b> |
|----------------|-------------------|--------------|-------------------|
| Lamiales       | 44.3              | Malpighiales | 49                |
| Angiosperms    | 131.0             | Myrtales     | 88.2              |
| Bignoniaceae   | 35                | Pandanales   | 65.0              |
| Caprifoliaceae | 36                | Poales       | 68.1              |
| Caryophyllales | 83.5              | Proteales    | 98.0              |
| Cornales       | 86.0              | Sapindales   | 65                |
| Dilleniaceae   | 51.9              | Solanales    | 44.3              |
| Ericales       | 91.2              | Vitaceae     | 57.9              |
| Fabales        | 59.9              | Zingiberales | 83.5              |
| Gymnosperms    | 310               |              |                   |

201

202

203 **Supplemental tables**

204 **Table S3.** Comparison of evolutionary model fits for each major lineage. Top values represent median Akaike Information Criterion  
205 values corrected for sample size (AICc) from comparative analyses performed on the distribution of phylogenetic trees. Below these  
206 values we report the proportion of trees that show strong support for each model ( $\Delta\text{AICc} \leq 4$ ). Models with the strongest support  
207 ( $\Delta\text{AICc} \leq 4$ ) are shown in bold. Models include: Brownian Motion models of stochastic evolution with either a single rate of evolution  
208 (BM1) or multiple rates for different traits (BMS), and Ornstein-Uhlenbeck models of stabilizing selection with either a single  
209 evolutionary optimum (OU1) or multiple optima for different traits (OUM). Up to three different multi-rate and multi-optima models  
210 are possible for each lineage base on plant traits: life-history (annual, intermediate, and perennial), woodiness (woody, non-woody),  
211 and growth form (tree, shrub, vine, forb, and graminoid). The “other angiosperms” lineage represents a paraphyletic grouping of species  
212 not contained as monophyletic groups of species in the other major lineages and includes basal angiosperms, basal eudicots, and basal  
213 coreeudicots.

214

215

216

217

218

219

220 **Table S3**

| lineage            | BM1             | BMS              |                  |                 | OU1                          | OUM                           |                                |                 |
|--------------------|-----------------|------------------|------------------|-----------------|------------------------------|-------------------------------|--------------------------------|-----------------|
|                    |                 | growth form      | woodiness        | life-history    |                              | growth form                   | woodiness                      | life-history    |
| <b>Ferns</b>       | 106.79<br>0.045 |                  |                  |                 | <b>82.56</b><br><b>1.000</b> |                               |                                |                 |
| <b>Gymnosperms</b> | 57.82<br>0.000  |                  |                  |                 | <b>40.28</b><br><b>1.000</b> |                               |                                |                 |
| <b>Magnoliids</b>  | 89.43<br>0.047  | 89.91<br>0.022   |                  |                 | <b>77.39</b><br><b>0.992</b> | <b>79.16</b><br><b>0.961</b>  |                                |                 |
| <b>Monocots</b>    | 474.14<br>0.000 | 443.58<br>0.000  | 458.10<br>0.000  | 474.52<br>0.000 | 352.95<br>0.061              | <b>344.11</b><br><b>0.923</b> | 354.54<br>0.015                | 354.19<br>0.011 |
| <b>Rosids</b>      | 2333.1<br>0.000 | 2283.77<br>0.000 | 2307.06<br>0.000 | 2321.3<br>0.000 | 1401.5<br>0.006              | 1400.54<br>0.000              | <b>1390.57</b><br><b>0.810</b> | 1403.4<br>0.000 |
| <b>Asterids</b>    | 1083.7<br>0.000 | 1026.10<br>0.000 | 1068.28<br>0.000 | 1055.1<br>0.000 | 649.55<br>0.001              | <b>638.78</b><br><b>0.799</b> | <b>635.41</b><br><b>0.859</b>  | 652.15<br>0.000 |
| <b>Other</b>       | 338.88          | 318.27           | 334.17           | 337.54          | <b>190.55</b>                | 193.34                        | <b>188.80</b>                  | 192.96          |
| <b>Angiosperms</b> | 0.000           | 0.000            | 0.000            | 0.000           | <b>0.935</b>                 | 0.047                         | <b>0.937</b>                   | 0.559           |

221

222 **Table S4.** Parameter estimates for the stabilizing selection models. Maximum likelihood (ML) parameter estimates for each major  
223 lineage for the Ornstein-Uhlenbeck models. See table S5 for the parameters of the poorly fitting BM models. Models include the single  
224 evolutionary optimum (OU1) and the multiple optima models for different traits (OUM). Up to three different multi-rate models are  
225 possible for each lineage base on plant traits: life-history (annual, intermediate, and perennial), woodiness (woody, non-woody), and  
226 growth form (tree, shrub, vine, forb, and graminoid). Estimates are median parameter values of the ML optima value across 1000  
227 phylogenetic trees. Values in parentheses are median 95% confidence intervals that were calculated for each tree and thus incorporate  
228 both phylogenetic uncertainty and uncertainty in the maximum likelihood estimates. Parameters include the rate of stochastic evolution  
229 ' $\sigma^2$ ', the strength of stabilizing selection ' $\alpha$ ', and the ML evolutionary optimum ' $\theta$ ', which is a phylogenetically informed estimate of the  
230 rate of herbivory for each group [43, 44].

231

232

233

234

235

236

237

238

**Table S4**

| lineage                  | OU1                  |                      |                      | OUM Life-History    |                     |                      |                     |                     |
|--------------------------|----------------------|----------------------|----------------------|---------------------|---------------------|----------------------|---------------------|---------------------|
|                          | $\alpha$             | $\sigma^2$           | $\theta$             | $\alpha$            | $\sigma^2$          | $\theta$ -Annuals    | $\theta$ – Interm.  | $\theta$ – Per.     |
| <b>Ferns</b>             | 1.13<br>(1.13-1.18)  | 1.7<br>(0.82-2.64)   | 5.83<br>(4.01-8.3)   |                     |                     |                      |                     |                     |
| <b>Gymnosperms</b>       | 0.14<br>(-0.07-0.36) | 0.13<br>(-0.06-0.33) | 0.87<br>(0.42-1.47)  |                     |                     |                      |                     |                     |
| <b>Magnoliids</b>        | 0.09<br>(-0.05-0.25) | 0.12<br>(-0.04-0.32) | 8.44<br>(5.47-12.18) |                     |                     |                      |                     |                     |
| <b>Monocots</b>          | 1.05<br>(0.03-2.64)  | 3<br>(0.07-7.2)      | 3.11<br>(2.25-4.01)  | 1.12<br>(0.03-2.64) | 3.37<br>(0.07-7.14) | 1.85<br>(-0.19-5.26) |                     | 3.17<br>(2.3-4.14)  |
| <b>Rosids</b>            | 2.99<br>(2.99 – 3)   | 4.58<br>(4.03-5.2)   | 8.16<br>(7.5-8.86)   | 2.99<br>(2.99-3)    | 4.57<br>(4.02-5.2)  | 6.61<br>(3.87-10.8)  | 5.43<br>(2.3-11.4)  | 8.25<br>(7.57-8.97) |
| <b>Asterids</b>          | 3.21<br>(3.2-3.25)   | 5.35<br>(4.38-6.52)  | 4.31<br>(3.73-4.97)  | 3.2<br>(3.2-3.25)   | 5.31<br>(4.33-6.51) | 3.09<br>(1.48-5.71)  | 3.75<br>(2.1-6.3)   | 4.44<br>(3.8-5.16)  |
| <b>Other Angiosperms</b> | 2.04<br>(2.04-2.06)  | 3.19<br>(2.13-4.44)  | 6.16<br>(4.8-7.81)   | 2.03<br>(2.03-2.06) | 3.09<br>(2.07-4.26) | 8.9<br>(1.94-2.29)   | 2.05<br>(-0.15-9.3) | 6.27<br>(4.87-7.98) |

241 **Table S4** continued

| lineage                  | OUM Woodiness |            |                     |                 | OUM Growth Form |            |                 |                |                |                |                     |        |
|--------------------------|---------------|------------|---------------------|-----------------|-----------------|------------|-----------------|----------------|----------------|----------------|---------------------|--------|
|                          | $\alpha$      | $\sigma^2$ | $\theta$ -Non-Woody | $\theta$ -Woody | $\alpha$        | $\sigma^2$ | $\theta$ -Shrub | $\theta$ -Tree | $\theta$ -Forb | $\theta$ -Vine | $\theta$ -Graminoid |        |
| <b>Ferns</b>             |               |            |                     |                 |                 |            |                 |                |                |                |                     |        |
| <b>Gymnosperms</b>       |               |            |                     |                 |                 |            |                 |                |                |                |                     |        |
| <b>Magnoliids</b>        |               |            |                     |                 | 0.16            | 0.2 (-     | 12.12           | 7.58           |                |                |                     |        |
|                          |               |            |                     |                 | (-0.12-         | 0.13-      | (5.75-          | (4.77-         |                |                |                     |        |
|                          |               |            |                     |                 | 0.5)            | 0.6)       | 23.38)          | 11.05)         |                |                |                     |        |
| <b>Monocots</b>          |               | 1.2        | 3.51                | 2.99            | 3.77            | 1.25       | 2.95            | 2.43           | 5.21           | 5.03           | 3.07                | 1.52   |
|                          |               | (0.03-     | (0.07-              | (2.12-          | (1.75-          | (0.04-     | (0.08-          | (0.53-         | (2.08-         | (3.5-          | (0.99-              | (0.86- |
|                          |               | 2.64)      | 7.17)               | 3.94)           | 6.93)           | 2.65)      | 6.24)           | 6.61)          | 11.64)         | 6.94)          | 6.71)               | 2.46)  |
| <b>Rosids</b>            |               | 2.99       | 4.49                | 5.48            | 8.63            | 2.99       | 4.54            | 8.63           | 8.49           | 5.97           | 7.43                |        |
|                          |               | (2.99-     | (3.95-              | (4.28-          | (7.9-           | (2.99-     | (3.99-          | (6.82-         | (7.7-          | (4.58-         | (4.92-              |        |
|                          |               | 3)         | 5.08)               | 6.94)           | 9.42)           | 3)         | 5.17)           | 10.85)         | 9.35)          | 7.7)           | 10.94)              |        |
| <b>Asterids</b>          |               | 3.21       | 5.02                | 3.08            | 5.55            | 3.21       | 4.99            | 5.02           | 5.94           | 3.02           | 4.3                 |        |
|                          |               | (3.21-     | (4.11-              | (2.45-          | (4.63-          | (3.21-     | (4.07-          | (3.75-         | (4.671-        | (2.36-         | (2.3-               |        |
|                          |               | 3.25)      | 6.14)               | 3.83)           | 6.61)           | 3.24)      | 6.07)           | 6.59)          | 7.468)         | 3.79)          | 7.44)               |        |
| <b>Other Angiosperms</b> |               | 2.04       | 3.01                | 4.76            | 7.72            | 2.04       | 3.01            | 7.23           | 8.21           | 4.71           | 8.16                |        |
|                          |               | (2.04-     | (2.01-              | (3.29-          | (5.55-          | (2.04-     | (2.01-          | (4.56-         | (4.79-         | (3.23-         | (2.94-              |        |
|                          |               | 2.06)      | 4.35)               | 6.7)            | 10.55)          | 2.06)      | 4.33)           | 11.09)         | 13.42)         | 6.67)          | 20.4)               |        |

242 **Table S5.** Parameter estimates for the stochastic evolution models: Maximum likelihood parameter estimates for each major lineage for the  
243 Brownian Motion models of stochastic evolution with either a single rate of evolution (BM1) or multiple rates for different traits (BMS). Up to three  
244 different multi-optima models are possible for each lineage base on plant traits: life-history (annual, intermediate, and perennial), woodiness  
245 (woody, non-woody), and growth form (tree, shrub, vine, forb, and graminoid). Estimates are median parameter values of the ML optima value  
246 across 1000 phylogenetic trees. Values in parentheses are median 95% confidence intervals that were calculated for each tree and thus incorporate  
247 both phylogenetic uncertainty and uncertainty in the maximum likelihood estimates. Parameters include the rate of stochastic evolution ' $\sigma^2$ ' and the  
248 ML evolutionary optimum ' $\theta$ ', which is a phylogenetically informed estimate of the rate of herbivory for each group [43, 44].  
249

250 **Table S5**

| lineage                      | BM1                 |                        | BMS Life-History        |                               |                            |                        |
|------------------------------|---------------------|------------------------|-------------------------|-------------------------------|----------------------------|------------------------|
|                              | $\sigma^2$          | $\theta$               | $\sigma^{2-}$<br>Annual | $\sigma^{2-}$<br>Intermediate | $\sigma^{2-}$<br>Perennial | $\theta$               |
| <b>Ferns</b>                 | 0.03<br>(0.01-0.04) | 5.52<br>(-0.74-131.24) |                         |                               |                            |                        |
| <b>Gymnosperms</b>           | 0.03<br>(0.01-0.05) | 0.71<br>(-0.97-107.03) |                         |                               |                            |                        |
| <b>Magnoliids</b>            | 0.04<br>(0.02-0.05) | 8.78<br>(0.58-55.47)   |                         |                               |                            |                        |
| <b>Monocots</b>              | 0.12<br>(0.09-0.15) | 3.61<br>(-0.78-85.84)  | 0.07<br>(-0.06-0.22)    |                               | 0.11<br>(0.08-0.14)        | 3.62<br>(-0.77-81.7)   |
| <b>Rosids</b>                | 0.28<br>(0.24-0.31) | 6.71<br>(-0.82-301.21) | 0.16 (0.02-<br>0.3)     | 0.05<br>(-0.05-0.17)          | 0.27<br>(0.24-0.3)         | 6.76<br>(-0.8-270.7)   |
| <b>Asterids</b>              | 0.23<br>(0.19-0.27) | 4.18<br>(-0.8-107.64)  | 0.29<br>(-0.04-0.7)     | 0.4<br>(0-0.85)               | 0.17<br>(0.13-0.2)         | 4.17<br>(-0.69-67.2)   |
| <b>Other<br/>Angiosperms</b> | 0.2<br>(0.14-0.27)  | 6.38<br>(-0.97-1451.3) | 0.001<br>(-0.002-0.005) | 0.22<br>(-0.28-0.76)          | 0.18<br>(0.12-0.25)        | 6.42<br>(-0.96-1138.1) |

*Table continues on the next page*251  
252



253 **Table S5** continued

| lineage                      | BMS Woodiness                  |                         |                          | BMS Growth Form          |                          |                         |                          |                            |                            |
|------------------------------|--------------------------------|-------------------------|--------------------------|--------------------------|--------------------------|-------------------------|--------------------------|----------------------------|----------------------------|
|                              | $\sigma^{2-}$<br>Non-<br>Woody | $\sigma^{2-}$<br>Woody  | $\theta$                 | $\sigma^{2-}$<br>Shrub   | $\sigma^{2-}$<br>Tree    | $\sigma^{2-}$<br>Forb   | $\sigma^{2-}$<br>Vine    | $\sigma^{2-}$<br>Graminoid | $\theta$                   |
| <b>Ferns</b>                 |                                |                         |                          |                          |                          |                         |                          |                            |                            |
| <b>Gymnosperms</b>           |                                |                         |                          |                          |                          |                         |                          |                            |                            |
| <b>Magnoliids</b>            |                                |                         |                          | 0.02<br>(-0.01-<br>0.06) | 0.04<br>(0.02-<br>0.06)  |                         |                          |                            | 8.89<br>(0.76-<br>52.07)   |
| <b>Monocots</b>              | 0.1<br>(0.07-<br>0.12)         | 0.11<br>(0.03-<br>0.19) | 3.62<br>(-0.69-<br>66.6) | 0.03<br>(-0.01-<br>0.09) | 0.14<br>(0.01-<br>0.27)  | 0.06<br>(0.03-<br>0.08) | 0.1<br>(-0.01-<br>0.2)   | 0.1<br>(0.06-<br>0.14)     | 3.63<br>(-0.47-<br>32.37)  |
| <b>Rosids</b>                | 0.11<br>(0.07-<br>0.15)        | 0.28<br>(0.25-<br>0.32) | 6.58<br>(-0.79 -<br>247) | 0.25<br>(0.13-0.38)      | 0.27<br>(0.23-0.3)       | 0.11<br>(0.07-<br>0.16) | 0.09<br>(0.02-<br>0.17)  |                            | 6.76<br>(-0.68-<br>190.27) |
| <b>Asterids</b>              | 0.23<br>(0.17-<br>0.3)         | 0.16<br>(0.12-<br>0.2)  | 4.19<br>(-0.67-<br>68.1) | 0.04<br>(0.02-0.06)      | 0.17<br>(0.12-<br>0.22)  | 0.23<br>(0.16-<br>0.29) | 0.16<br>(0.03-<br>0.3)   |                            | 3.96<br>(-0.23-<br>26.56)  |
| <b>Other<br/>Angiosperms</b> | 0.21<br>(0.11-<br>0.31)        | 0.15<br>(0.08-<br>0.21) | 6.4<br>(-0.94-<br>850)   | 0.26<br>(0.1-0.42)       | 0.01<br>(-0.00-<br>0.01) | 0.2<br>(0.11-<br>0.29)  | 0.04<br>(-0.01-<br>0.09) |                            | 6.2<br>(-0.63-<br>128.8)   |

254 **Supplemental figures**

255 **Supplemental figure legends**

256 **Figure S1.** Evolutionary parameters for the best fitting model. Comparison of the evolutionary  
257 parameters estimated from the best fitting macroevolutionary model for each major plant lineage.  
258 ‘ $\alpha$ ’ represents the strength of stabilizing selection and ‘ $\sigma^2$ ’ is the rate of stochastic evolution [43].  
259 Values represent median estimates and median 95% confidence intervals over the distribution of  
260 1000 phylogenies.

261  
262 **Figure S2.** Relationship between herbivory and life-history variation. Percent leaf herbivory for  
263 lineages that vary in life-history strategy, which represent the evolutionary optima from the  
264 stabilizing selection model (OUM – Life-History). Values represent median percent leaf herbivory  
265 and median 95% confidence intervals over the distribution of 1000 phylogenies. Number of  
266 species for each group is found within data points. Annual ‘other angiosperms’ were poorly  
267 sampled and has a wide 95% confidence interval (1.9% – 32.3%) that extended beyond the bounds  
268 of the figure.

269

270

271 **Figure S1**

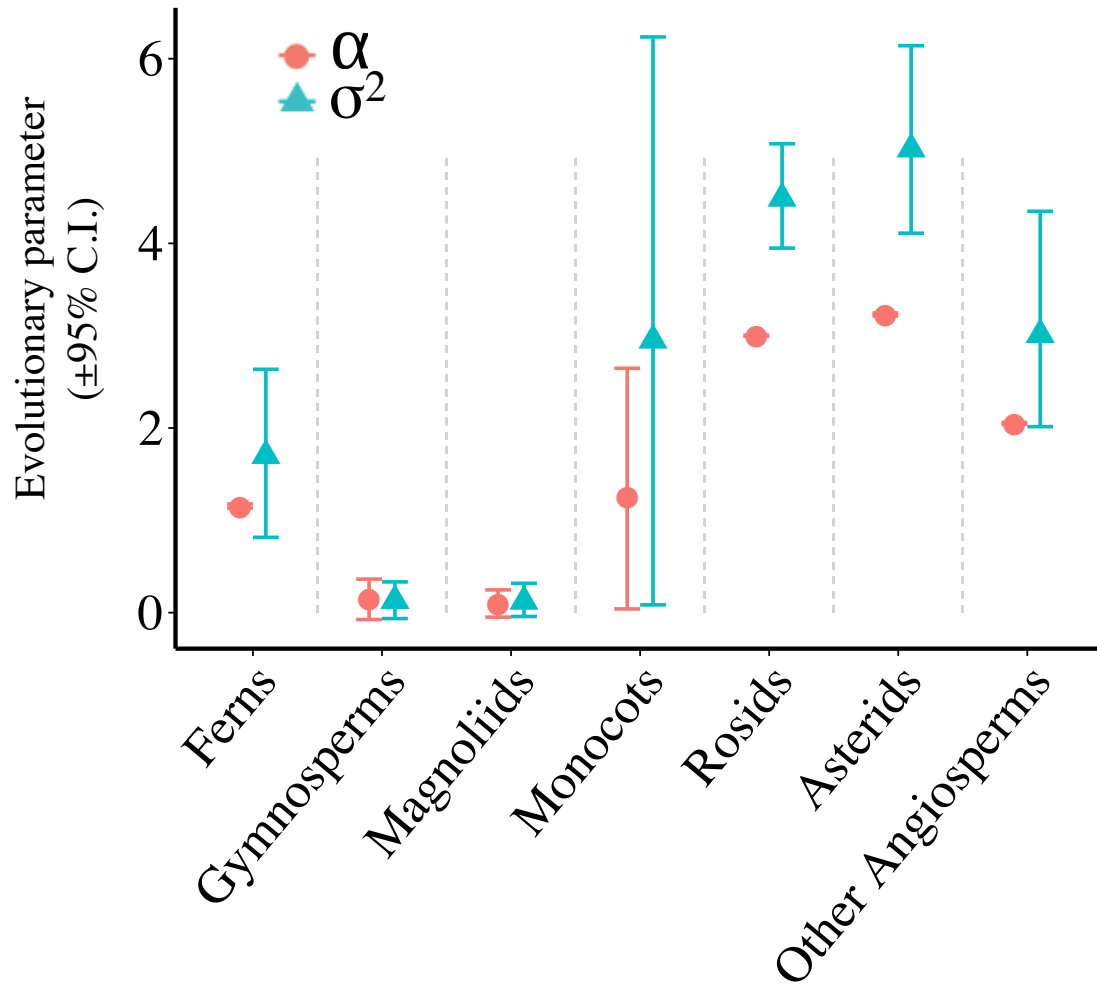

272

273 Figure S2

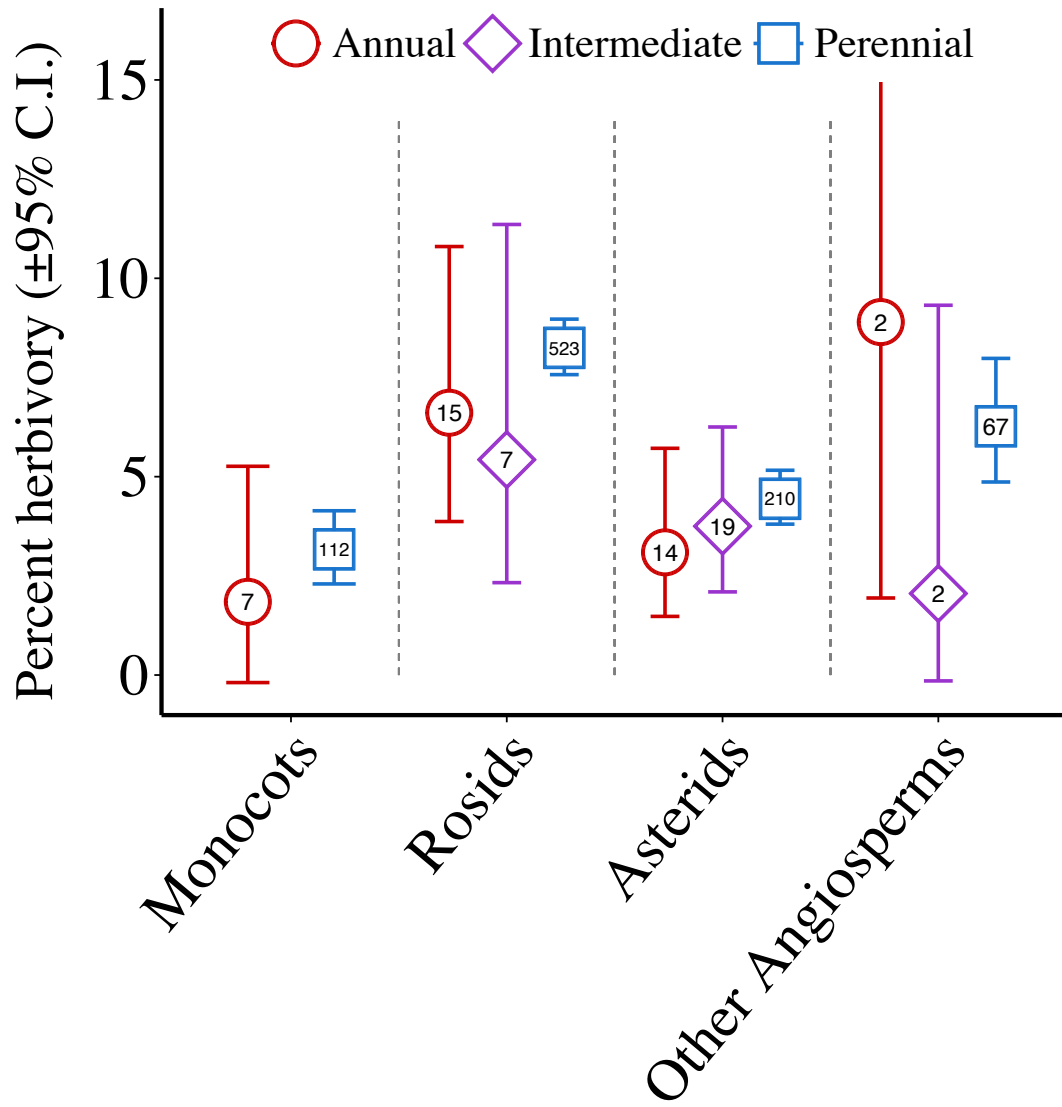

274

275 **Supplemental References**

- 276 [1] Crawley, MJ. 1989 Insect herbivores and plant population dynamics. *Annu. Rev. Entomol.* **34**,  
277 531-562. (doi:doi:10.1146/annurev.en.34.010189.002531).
- 278 [2] McNaughton, SJ, Oesterheld, M, Frank, DA & Williams, KJ. 1989 Ecosystem-level patterns  
279 of primary productivity and herbivory in terrestrial habitats. *Nature* **341**, 142-144.
- 280 [3] Maron, JL & Crone, E. 2006 Herbivory: effects on plant abundance, distribution and  
281 population growth. *Proc. R. Soc. B* **273**, 2575-2584. (doi:10.1098/rspb.2006.3587).
- 282 [4] Clark, DB & Clark, DA. 1985 Seedling dynamics of a tropical tree: Impacts of herbivory and  
283 meristem damage. *Ecology* **66**, 1884-1892.
- 284 [5] Marquis, RJ. 1992 A bite is a bite is a bite? Constraints on response to folivory in *Piper*  
285 *ariefianum* (Piperaceae). *Ecology* **73**, 143-152.
- 286 [6] Hawkes, CV & Sullivan, JJ. 2001 The impact of herbivory on plants in different resource  
287 conditions: a meta-analysis. *Ecology* **82**, 2045-2058.
- 288 [7] Bigger, DS & Marvier, MA. 1998 How different would a world without herbivory be?: A  
289 search for generality in ecology. *Integr. Biol.* **1**, 60-67.
- 290 [8] Turley, NE, Odell, WC, Schaefer, H, Everwand, G, Crawley, MJ & Johnson, MTJ. 2013  
291 Contemporary evolution of plant growth rate following experimental removal of herbivores. *Am.*  
292 *Nat.* **181**, S21-S34. (doi:10.1086/668075).

- 293 [9] Stenberg, JA, Witzell, J & Ericson, L. 2006 Tall herb herbivory resistance reflects historic  
294 exposure to leaf beetles in a boreal archipelago age-gradient. *Oecologia* **148**, 414-425.  
295 (doi:10.1007/s00442-006-0390-7).
- 296 [10] Prasad, KVSK, Song, BH, Olson-Manning, C, Anderson, JT, Lee, CR, Schranz, ME,  
297 Windsor, AJ, Clauss, MJ, Manzaneda, AJ, Naqvi, I, et al. 2012 A gain-of-function polymorphism  
298 controlling complex traits and fitness in nature. *Science* **337**, 1081-1084.  
299 (doi:10.1126/science.1221636).
- 300 [11] Fine, PVA, Mesones, I & Coley, PD. 2004 Herbivores promote habitat specialization by  
301 trees in amazonian forests. *Science* **305**, 663-665. (doi:10.1126/science.1098982).
- 302 [12] Chapin, SFI, Matson, PA & Vitousek, PM. 2011 *Principles of Terrestrial Ecosystem*  
303 *Ecology*. New York, Springer; 529 p.
- 304 [13] Belovsky, GE & Slade, JB. 2000 Insect herbivory accelerates nutrient cycling and increases  
305 plant production. *Proc. Natl. Acad. Sci. U.S.A.* **97**, 14412-14417. (doi:10.1073/pnas.250483797).
- 306 [14] Schmitz, OJ. 2008 Herbivory from individuals to ecosystems. *Annu. Rev. Ecol. Evol. Syst.*  
307 **39**, 133-152. (doi:10.1146/annurev.ecolsys.39.110707.173418).
- 308 [15] Schowalter, TD. 2011 *Insect ecology: an ecosystem approach*. 3rd ed. London, Academic  
309 Press; 633 p.
- 310 [16] Zvereva, EL, Lanta, V & Kozlov, MV. 2010 Effects of sap-feeding insect herbivores on  
311 growth and reproduction of woody plants: a meta-analysis of experimental studies. *Oecologia* **163**,  
312 949-960. (doi:10.1007/s00442-010-1633-1).

- 313 [17] McCall, AC & Irwin, RE. 2006 Florivory: The intersection of pollination and herbivory.  
314 *Ecol. Lett.* **9**, 1351-1365. (doi:10.1111/j.1461-0248.2006.00975.x).
- 315 [18] Rasmann, S & Agrawal, AA. 2008 In defense of roots: a research agenda for studying plant  
316 resistance to belowground herbivory. *Plant Physiol.* **146**, 875-880.
- 317 [19] Zangerl, AR & Rutledge, CE. 1996 The probability of attack and patterns of constitutive and  
318 induced defense: A test of optimal defense theory. *Am. Nat.* **147**, 599-608.
- 319 [20] Landsberg, J. 1989 A comparison of methods for assessing defoliation, tested on eucalypt  
320 trees. *Aust. J. Ecol.* **14**, 423-440.
- 321 [21] Coley, PD & Barone, JA. 1996 Herbivory and plant defenses in tropical forests. *Annu. Rev.*  
322 *Ecol. Syst.* **27**, 305-335.
- 323 [22] Coley, PD. 1982 Rates of herbivory on different tropical trees. In *The ecology of a tropical*  
324 *forest: seasonal rhythms and long-term changes* (eds. J. Leigh E.G, A.S. Rand & D.M. Windsor),  
325 pp. 123-132. Washington, Smithsonian Press.
- 326 [23] Brown, BJ & Ewel, JJ. 1987 Herbivory in complex and simple tropical successional  
327 ecosystems. *Ecology* **68**, 108-116.
- 328 [24] Lamarre, GP, Baraloto, C, Fortunel, C, Dávila, N, Mesones, I, Grandez Ríos, J, Ríos, M,  
329 Valderrama, E, Vasquez Pilco, M & Fine, PVA. 2012 Herbivory, growth strategies and habitat  
330 specialization in tropical tree lineages: implications for Amazon beta-diversity. *Ecology* **93**, S195–  
331 S210. (doi:10.1890/11-0397.1).

- 332 [25] Lowman, MD. 1984 An assessment of techniques for measuring herbivory: is rainforest  
333 defoliation more intense than we thought? *Biotropica* **16**, 264-268.
- 334 [26] Filip, V, Dirzo, R, Maass, JM & Sarukhan, J. 1995 Within- and among-year variation in the  
335 levels of herbivory on the foliage of trees from a Mexican tropical deciduous forest. *Biotropica* **27**,  
336 78-86.
- 337 [27] Dirzo, R & Boege, K. 2008 Patterns of herbivory and defense in tropical dry and rain  
338 forests. In *Tropical forest community ecology* (eds. W.P. Carson & S.A. Schnitzer), pp. 63-78.  
339 Chichester, Wiley-Blackwell.
- 340 [28] Shaw, DC, Ernest, KA, Rinker, HB & Lowman, MD. 2006 Stand-level herbivory in an old-  
341 growth conifer forest canopy. *West. N. Am. Nat.* **66**, 473-481. (doi:10.3398/1527-  
342 0904(2006)66[473:shiaoc]2.0.co;2).
- 343 [29] Cahill Jr, JF, Castelli, JP & Casper, BB. 2001 The herbivory uncertainty principle: visiting  
344 plants can alter herbivory. *Ecology* **82**, 307-312. (doi:10.1890/0012-  
345 9658(2001)082[0307:THUPVP]2.0.CO;2).
- 346 [30] Hik, DS, Brown, M, Dabros, A, Weir, J & Cahill Jr, JF. 2003 Prevalence and predictability  
347 of handling effects in field studies: results from field experiments and a meta-analysis. *Am. J. Bot.*  
348 **90**, 270-277. (doi:10.3732/ajb.90.2.270).
- 349 [31] Lowman, MD. 1985 Temporal and spatial variability in insect grazing of the canopies of 5  
350 Australian rainforest tree species. *Aust. J. Ecol.* **10**, 7-24.



351 [32] Massey, FP, Massey, K, Press, MC & Hartley, SE. 2006 Neighbourhood composition  
352 determines growth, architecture and herbivory in tropical rain forest tree seedlings. *J. Ecol.* **94**,  
353 646-655. (doi:10.1111/j.1365-2745.2006.01127.x).

354 [33] Brenes-Arguedas, T, Coley, PD & Kursar, TA. 2009 Pests vs. drought as determinants of  
355 plant distribution along a tropical rainfall gradient. *Ecology* **90**, 1751-1761. (doi:10.1890/08-  
356 1271.1).

357 [34] Turcotte, MM, Thomsen, CJM, Broadhead, GT, Fine, PVA, Godfrey, RM, Lamarre, GPA,  
358 Meyer, ST, Richards, LA & Johnson, MTJ. 2014 Percent leaf herbivory across vascular plant  
359 species. *Ecology* **95**, 788. (doi:10.1890/13-1741.1).

360 [35] Webb, CO & Donoghue, MJ. 2005 Phylomatic: tree assembly for applied phylogenetics.  
361 *Mol. Ecol. Notes* **5**, 181-183. (doi:10.1111/j.1471-8286.2004.00829.x).

362 [36] The angiosperm phylogeny group. 2009 An update of the Angiosperm Phylogeny Group  
363 classification for the orders and families of flowering plants: APG III. *Bot. J. Linn. Soc.* **161**, 105-  
364 121. (doi:10.1111/j.1095-8339.2009.00996.x).

365 [37] Hall, TA. 1999 BioEdit: A user-friendly biological sequence alignment editor and analysis  
366 program for Windows 95/98/NT. *Nucleic Acids Symp. Ser.* **41**, 95–98.

367 [38] Stamatakis, A, Hoover, P & Rougemont, J. 2008 A rapid bootstrap algorithm for the  
368 RAxML web servers. *Syst. Biol.* **57**, 758-771. (doi:10.1080/10635150802429642).

369 [39] Stamatakis, A. 2006 RAxML-VI-HPC: Maximum likelihood-based phylogenetic analyses  
370 with thousands of taxa and mixed models. *Bioinformatics* **22**, 2688-2690.  
371 (doi:10.1093/bioinformatics/btl446).

- 372 [40] Drummond, AJ, Suchard, MA, Xie, D & Rambaut, A. 2012 Bayesian phylogenetics with  
373 BEAUti and the BEAST 1.7. *Mol. Biol. Evol.* **29**, 1969-1973. (doi:10.1093/molbev/mss075).
- 374 [41] Posada, D. 2008 jModelTest: Phylogenetic model averaging. *Mol. Biol. Evol.* **25**, 1253-  
375 1256. (doi:10.1093/molbev/msn083).
- 376 [42] Kuhn, TS, Mooers, AØ & Thomas, GH. 2011 A simple polytomy resolver for dated  
377 phylogenies. *Methods Ecol. Evol.* **2**, 427-436. (doi:10.1111/j.2041-210X.2011.00103.x).
- 378 [43] Butler, MA & King, AA. 2004 Phylogenetic comparative analysis: A modeling approach for  
379 adaptive evolution. *Am. Nat.* **164**, 683-695. (doi:10.1086/426002).
- 380 [44] Beaulieu, JM, Jhwueng, D-C, Boettiger, C & O'Meara, BC. 2012 Modeling stabilizing  
381 selection: expanding the Ornstein–Uhlenbeck model of adaptive evolution. *Evolution* **66**, 2369-  
382 2383. (doi:10.1111/j.1558-5646.2012.01619.x).
- 383 [45] Hansen, TF. 1997 Stabilizing selection and the comparative analysis of adaptation.  
384 *Evolution* **51**, 1341-1351.
- 385 [46] Martins, EP & Hansen, TF. 1997 Phylogenies and the comparative method: A general  
386 approach to incorporating phylogenetic information into the analysis of interspecific data. *Am.*  
387 *Nat.* **149**, 646-667.
- 388 [47] Burnham, KP & Anderson, DR. 2002 *Model selection and multimodel inference: a practical*  
389 *information-theoretic approach*. 2nd ed. New York, Springer-Verlag.
- 390 [48] Revell, LJ. 2011 phytools: An R package for phylogenetic comparative biology (and other  
391 things). *Methods Ecol. Evol.* **3**, 217-223. (doi:10.1111/j.2041-210X.2011.00169.x).

392 [49] R Core Team, 2013 R: a language and environment for statistical computing. 3.0.2. Vienna,  
393 Austria, R Foundation for Statistical Computing.

394 [50] Wikstrom, N, Savolainen, V & Chase, MW. 2001 Evolution of the angiosperms: calibrating  
395 the family tree. *Proc. R. Soc. B* **268**, 2211-2220. (doi:10.1098/rspb.2001.1782).

396 [51] Pryer, KM, Schuettpelz, E, Wolf, PG, Schneider, H, Smith, AR & Cranfill, R. 2004  
397 Phylogeny and evolution of ferns (monilophytes) with a focus on the early leptosporangiate  
398 divergences. *Am. J. Bot.* **91**, 1582-1598. (doi:10.3732/ajb.91.10.1582).

399

400
