# Supplementary material
Source: PubMed Central journal article supplement (PMC4071545)
Supplement: rspb20140555supp2.pdf [file rspb20140555supp2.pdf]

1 **Table S6:** Table presents each species used in analysis with its taxonomic information, trait data, mean annual percent leaf tissue  
2 consumed, and sources of data. Woodiness traits include: woody (W) and non-woody (NW). Plant growth forms include: forb  
3 (F), shrub (S), tree (T), vine (V), and graminoid (G). Life-history traits include: annual (A), intermediate (I), and perennial (P).  
4 ‘Other angiosperms’ represent a paraphyletic group of species that were not contained within monophyletic angiosperm lineages  
5 and include basal angiosperms, basal eudicots, and basal coreeudicots. Bibliography is found below the table.  
6

|    | species                      | synonym                  | major taxonomic lineage | woodiness | growth form | life-history | mean percent leaf damage | sources of data  |
|----|------------------------------|--------------------------|-------------------------|-----------|-------------|--------------|--------------------------|------------------|
| 1  | <i>Abies balsamea</i>        | <i>Abies balsamifera</i> | Gymnosperms             | W         | T           | P            | 3.40                     | [1]              |
| 2  | <i>Abies grandis</i>         |                          | Gymnosperms             | W         | T           | P            | 0.22                     | [2, 3]           |
| 3  | <i>Abuta panamensis</i>      |                          | Other Angiosperms       | W         | V           | P            | 13.00                    | [4]              |
| 4  | <i>Abutilon theophrasti</i>  |                          | Rosids                  | NW        | F           | A            | 1.00                     | [5]              |
| 5  | <i>Acacia falcata</i>        |                          | Rosids                  | W         | S           | P            | 15.89                    | [6]              |
| 6  | <i>Acacia floribunda</i>     |                          | Rosids                  | W         | S           | P            | 55.47                    | [7]              |
| 7  | <i>Acacia terminalis</i>     |                          | Rosids                  | W         | S           | P            | 29.06                    | [7]              |
| 8  | <i>Acalypha diversifolia</i> |                          | Rosids                  | W         | S           | P            | 11.69                    | [8]              |
| 9  | <i>Acalypha skutchii</i>     |                          | Rosids                  | W         | S           | P            | 24.00                    | [4]              |
| 10 | <i>Acanthus ilicifolius</i>  |                          | Asterids                | W         | S           | P            | 7.90                     | [9]              |
| 11 | <i>Acer glabrum</i>          |                          | Rosids                  | W         | T           | P            | 5.00                     | [10]             |
| 12 | <i>Acer negundo</i>          |                          | Rosids                  | W         | T           | P            | 41.00                    | [11]             |
| 13 | <i>Acer oblongum</i>         |                          | Rosids                  | W         | T           | P            | 4.52                     | [12]             |
| 14 | <i>Acer pensylvanicum</i>    |                          | Rosids                  | W         | T           | P            | 3.27                     | [13]             |
| 15 | <i>Acer platanoides</i>      |                          | Rosids                  | W         | T           | P            | 3.77                     | [10, 14, 15]     |
| 16 | <i>Acer pseudoplatanus</i>   |                          | Rosids                  | W         | T           | P            | 9.39                     | [15-18]          |
| 17 | <i>Acer rubrum</i>           |                          | Rosids                  | W         | T           | P            | 4.87                     | [19-24]          |
| 18 | <i>Acer saccharinum</i>      |                          | Rosids                  | W         | T           | P            | 1.49                     | [25]             |
| 19 | <i>Acer saccharum</i>        |                          | Rosids                  | W         | T           | P            | 8.41                     | [10, 20, 26, 27] |
| 20 | <i>Achatocarpus gracilis</i> |                          | Other Angiosperms       | W         | S           | P            | 12.17                    | [28, 29]         |

|    | species                        | synonym                    | major taxonomic lineage | woodiness | growth form | life-history | mean percent leaf damage | sources of data |
|----|--------------------------------|----------------------------|-------------------------|-----------|-------------|--------------|--------------------------|-----------------|
| 21 | <i>Achillea millefolium</i>    |                            | Asterids                | NW        | F           | P            | 0.73                     | [30, 31]        |
| 22 | <i>Acrostichum speciosum</i>   |                            | Ferns                   | NW        | F           | P            | 3.50                     | [9]             |
| 23 | <i>Actinodaphne</i> spp.       |                            | Magnoliids              | W         | T           | P            | 10.60                    | [32]            |
| 24 | <i>Adiantum obliquum</i>       |                            | Ferns                   | NW        | F           | P            | 7.30                     | [33]            |
| 25 | <i>Aegialitis annulata</i>     |                            | Other Angiosperms       | W         | T           | P            | 5.20                     | [9, 34]         |
| 26 | <i>Aegiceras corniculatum</i>  |                            | Asterids                | W         | T           | P            | 12.00                    | [9, 34]         |
| 27 | <i>Aegopodium podagraria</i>   |                            | Asterids                | NW        | F           | P            | 14.70                    | [10]            |
| 28 | <i>Aextoxicon punctatum</i>    |                            | Other Angiosperms       | W         | T           | P            | 7.45                     | [35]            |
| 29 | <i>Aframomum</i> cf.           |                            | Monocots                | NW        | F           | P            | 2.50                     | [36]            |
| 30 | <i>Aframomum mildbraedii</i>   |                            | Monocots                | NW        | F           | P            | 3.40                     | [36]            |
| 31 | <i>Agastache urticifolia</i>   |                            | Asterids                | NW        | S           | P            | 7.60                     | [10]            |
| 32 | <i>Ageratina riparia</i>       |                            | Asterids                | W         | S           | P            | 1.05                     | [37]            |
| 33 | <i>Aglaiia mackiana</i>        |                            | Rosids                  | W         | T           | P            | 14.50                    | [38]            |
| 34 | <i>Agropyron trachycaulum</i>  | <i>Elymus trachycaulus</i> | Monocots                | NW        | G           | P            | 1.44                     | [39, 40]        |
| 35 | <i>Alchemilla vulgaris</i>     |                            | Rosids                  | NW        | F           | P            | 2.70                     | [41]            |
| 36 | <i>Alchornea costaricensis</i> |                            | Rosids                  | W         | T           | P            | 68.67                    | [8]             |
| 37 | <i>Alliaria petiolata</i>      |                            | Rosids                  | NW        | F           | I            | 2.90                     | [10, 42]        |
| 38 | <i>Allophylus campostachys</i> |                            | Rosids                  | W         | T           | P            | 8.20                     | [4]             |
| 39 | <i>Alnus incana</i>            |                            | Rosids                  | W         | T           | P            | 2.90                     | [10]            |
| 40 | <i>Alocasia brisbanensis</i>   |                            | Monocots                | NW        | F           | P            | 2.00                     | [36]            |
| 41 | <i>Alopecurus pratensis</i>    |                            | Monocots                | NW        | G           | P            | 1.38                     | [31]            |
| 42 | <i>Alpinia arctiflora</i>      |                            | Monocots                | NW        | F           | P            | 2.10                     | [36]            |
| 43 | <i>Alpinia caerulea</i>        |                            | Monocots                | NW        | F           | P            | 2.10                     | [36]            |

|    | species                           | synonym | major taxonomic lineage | woodiness | growth form | life-history | mean percent leaf damage | sources of data |
|----|-----------------------------------|---------|-------------------------|-----------|-------------|--------------|--------------------------|-----------------|
| 44 | <i>Alpinia modesta</i>            |         | Monocots                | NW        | F           | P            | 0.25                     | [36]            |
| 45 | <i>Alseis blackiana</i>           |         | Asterids                | W         | T           | P            | 39.37                    | [8]             |
| 46 | <i>Amaranthus hypochondriacus</i> |         | Other Angiosperms       | NW        | F           | P            | 9.80                     | [43]            |
| 47 | <i>Ambrosia artemisiifolia</i>    |         | Asterids                | NW        | F           | A            | 2.29                     | [5, 44, 45]     |
| 48 | <i>Ampelocera hottlei</i>         |         | Rosids                  | W         | T           | P            | 9.11                     | [4]             |
| 49 | <i>Anacardium excelsum</i>        |         | Rosids                  | W         | T           | P            | 4.18                     | [46, 47]        |
| 50 | <i>Anaxagorea dolichocarpa</i>    |         | Magnoliids              | W         | T           | P            | 6.20                     | [48]            |
| 51 | <i>Andropogon bladhii</i>         |         | Monocots                | NW        | G           | P            | 6.70                     | [49]            |
| 52 | <i>Andropogon gerardii</i>        |         | Monocots                | NW        | G           | P            | 16.24                    | [49]            |
| 53 | <i>Anemone cylindrica</i>         |         | Other Angiosperms       | NW        | F           | P            | 3.08                     | [23]            |
| 54 | <i>Angophora floribunda</i>       |         | Rosids                  | W         | T           | P            | 17.00                    | [50]            |
| 55 | <i>Angophora hispida</i>          |         | Rosids                  | W         | T           | P            | 90.02                    | [7]             |
| 56 | <i>Anisoptera thurifera</i>       |         | Rosids                  | W         | T           | P            | 7.45                     | [51]            |
| 57 | <i>Annona spraguei</i>            |         | Magnoliids              | W         | T           | P            | 36.03                    | [8]             |
| 58 | <i>Anthoxanthum odoratum</i>      |         | Monocots                | NW        | G           | P            | 1.14                     | [31]            |
| 59 | <i>Anthriscus sylvestris</i>      |         | Asterids                | NW        | F           | I            | 0.51                     | [31]            |
| 60 | <i>Aphelandra aurantiaca</i>      |         | Asterids                | W         | T           | P            | 6.16                     | [4]             |
| 61 | <i>Apocynum cannabinum</i>        |         | Asterids                | NW        | F           | P            | 12.12                    | [52]            |
| 62 | <i>Aquilegia canadensis</i>       |         | Other Angiosperms       | NW        | F           | P            | 1.43                     | [5]             |
| 63 | <i>Aquilegia coerulea</i>         |         | Other Angiosperms       | NW        | F           | P            | 8.05                     | [53]            |
| 64 | <i>Arabidopsis lyrata</i>         |         | Rosids                  | NW        | F           | P            | 3.79                     | [54]            |
| 65 | <i>Arabidopsis thaliana</i>       |         | Rosids                  | NW        | F           | A            | 8.45                     | [55, 56]        |
| 66 | <i>Arctostaphylos uva-ursi</i>    |         | Asterids                | W         | S           | P            | 1.21                     | [30]            |

|    | species                         | synonym | major taxonomic lineage | woodiness | growth form | life-history | mean percent leaf damage | sources of data |
|----|---------------------------------|---------|-------------------------|-----------|-------------|--------------|--------------------------|-----------------|
| 67 | <i>Ardisia crenata</i>          |         | Asterids                | W         | S           | P            | 2.91                     | [57, 58]        |
| 68 | <i>Ardisia spp.</i>             |         | Asterids                | W         | T           | P            | 1.90                     | [32]            |
| 69 | <i>Argyroxiphium kauense</i>    |         | Asterids                | NW        | F           | P            | 0.00                     | [37]            |
| 70 | <i>Aristotelia chilensis</i>    |         | Rosids                  | W         | T           | P            | 9.01                     | [59]            |
| 71 | <i>Arnica montana</i>           |         | Asterids                | NW        | F           | P            | 2.75                     | [60]            |
| 72 | <i>Arrabidaea candicans</i>     |         | Asterids                | W         | V           | P            | 0.71                     | [61]            |
| 73 | <i>Arrabidaea patellifera</i>   |         | Asterids                | W         | V           | P            | 3.49                     | [61]            |
| 74 | <i>Arrhenatherum elatius</i>    |         | Monocots                | NW        | G           | P            | 0.76                     | [31]            |
| 75 | <i>Artemisia biennis</i>        |         | Asterids                | NW        | F           | I            | 4.17                     | [39, 40]        |
| 76 | <i>Artemisia campestris</i>     |         | Asterids                | NW        | F           | I            | 6.03                     | [39, 40]        |
| 77 | <i>Artemisia ludoviciana</i>    |         | Asterids                | NW        | F           | P            | 0.93                     | [30]            |
| 78 | <i>Artemisia norvegica</i>      |         | Asterids                | NW        | F           | P            | 0.38                     | [30]            |
| 79 | <i>Artocarpus heterophyllus</i> |         | Rosids                  | W         | T           | P            | 5.99                     | [12]            |
| 80 | <i>Asarum canadense</i>         |         | Magnoliids              | NW        | F           | P            | 10.90                    | [10]            |
| 81 | <i>Asclepias curassavica</i>    |         | Asterids                | NW        | S           | P            | 0.80                     | [62]            |
| 82 | <i>Asclepias incarnata</i>      |         | Asterids                | NW        | F           | P            | 0.69                     | [5]             |
| 83 | <i>Asclepias syriaca</i>        |         | Asterids                | NW        | F           | P            | 9.66                     | [5, 10, 39, 40] |
| 84 | <i>Asimina incana</i>           |         | Magnoliids              | W         | S           | P            | 25.09                    | [63]            |
| 85 | <i>Aspidosperma tomentosum</i>  |         | Asterids                | W         | T           | P            | 8.86                     | [64]            |
| 86 | <i>Asplenium nidus</i>          |         | Ferns                   | NW        | F           | P            | 6.20                     | [65]            |
| 87 | <i>Asplenium platyneuron</i>    |         | Ferns                   | NW        | F           | P            | 2.28                     | [1]             |
| 88 | <i>Asplundia uncinata</i>       |         | Monocots                | NW        | F           | P            | 3.50                     | [36]            |
| 89 | <i>Astelia menziesiana</i>      |         | Monocots                | NW        | F           | P            | 1.24                     | [37]            |
| 90 | <i>Aster novae-angliae</i>      |         | Asterids                | NW        | F           | P            | 8.40                     | [10]            |

|     | species                          | synonym                         | major taxonomic lineage | woodiness | growth form | life-history | mean percent leaf damage | sources of data |
|-----|----------------------------------|---------------------------------|-------------------------|-----------|-------------|--------------|--------------------------|-----------------|
| 91  | <i>Astrocaryum mexicanum</i>     |                                 | Monocots                | W         | T           | P            | 13.50                    | [4]             |
| 92  | <i>Avicennia germinans</i>       |                                 | Asterids                | W         | T           | P            | 0.50                     | [66]            |
| 93  | <i>Avicennia marina</i>          |                                 | Asterids                | W         | T           | P            | 9.48                     | [9, 34, 67]     |
| 94  | <i>Avicennia officinalis</i>     |                                 | Asterids                | W         | T           | P            | 6.90                     | [34]            |
| 95  | <i>Avicennia rumphiana</i>       |                                 | Asterids                | W         | T           | P            | 5.90                     | [34]            |
| 96  | <i>Baccharis halimifolia</i>     |                                 | Asterids                | W         | S           | P            | 5.41                     | [68]            |
| 97  | <i>Baccharis pilularis</i>       |                                 | Asterids                | W         | S           | P            | 6.28                     | [69]            |
| 98  | <i>Banisteriopsis campestris</i> |                                 | Rosids                  | NW        | F           | P            | 14.55                    | [64]            |
| 99  | <i>Banksia ericifolia</i>        |                                 | Other Angiosperms       | W         | S           | P            | 16.00                    | [7]             |
| 100 | <i>Banksia oblongifolia</i>      |                                 | Other Angiosperms       | W         | S           | P            | 1.50                     | [7]             |
| 101 | <i>Banksia serrata</i>           |                                 | Other Angiosperms       | W         | S           | P            | 1.82                     | [7]             |
| 102 | <i>Barjonia erecta</i>           |                                 | Asterids                | NW        | F           | P            | 0.65                     | [64]            |
| 103 | <i>Begonia spp.1</i>             |                                 | Rosids                  | NW        | F           | P            | 5.00                     | [70]            |
| 104 | <i>Begonia spp.2</i>             |                                 | Rosids                  | NW        | F           | P            | 7.00                     | [70]            |
| 105 | <i>Bellis perennis</i>           |                                 | Asterids                | NW        | F           | P            | 2.30                     | [31]            |
| 106 | <i>Berberis repens</i>           | <i>Mahonia repens</i>           | Other Angiosperms       | W         | S           | P            | 9.00                     | [10]            |
| 107 | <i>Berberis thunbergii</i>       |                                 | Other Angiosperms       | W         | S           | P            | 2.60                     | [10]            |
| 108 | <i>Betonica officinalis</i>      | <i>Stachys officinalis</i>      | Asterids                | NW        | F           | P            | 2.38                     | [71]            |
| 109 | <i>Betula papyrifera</i>         |                                 | Rosids                  | W         | T           | P            | 10.50                    | [10]            |
| 110 | <i>Betula pendula</i>            |                                 | Rosids                  | W         | T           | P            | 26.28                    | [72, 73]        |
| 111 | <i>Betula pubescens</i>          |                                 | Rosids                  | W         | T           | P            | 2.87                     | [73]            |
| 112 | <i>Bidens pilosa</i>             |                                 | Asterids                | NW        | F           | A            | 0.40                     | [62]            |
| 113 | <i>Blechnum varians</i>          |                                 | Ferns                   | NW        | F           | P            | 10.65                    | [70, 74]        |
| 114 | <i>Bonafousia undulata</i>       | <i>Tabernaemontana undulata</i> | Asterids                | W         | T           | P            | 1.40                     | [48]            |

|     | species                         | synonym | major taxonomic lineage | woodiness | growth form | life-history | mean percent leaf damage | sources of data  |
|-----|---------------------------------|---------|-------------------------|-----------|-------------|--------------|--------------------------|------------------|
| 115 | <i>Bonamia maripoides</i>       |         | Asterids                | W         | V           | P            | 5.46                     | [61]             |
| 116 | <i>Boronia ledifolia</i>        |         | Rosids                  | W         | S           | P            | 8.02                     | [7]              |
| 117 | <i>Borreria spp.</i>            |         | Asterids                | NW        | F           | P            | 6.99                     | [64]             |
| 118 | <i>Borrichia frutescens</i>     |         | Asterids                | W         | S           | P            | 0.54                     | [5]              |
| 119 | <i>Brachychiton acerifolius</i> |         | Rosids                  | W         | T           | P            | 22.80                    | [65]             |
| 120 | <i>Brachypodium sylvaticum</i>  |         | Monocots                | NW        | G           | P            | 5.54                     | [75]             |
| 121 | <i>Brasenia schreberi</i>       |         | Other Angiosperms       | NW        | F           | P            | 2.36                     | [1]              |
| 122 | <i>Brassica oleracea</i>        |         | Rosids                  | NW        | F           | P            | 14.01                    | [76-80]          |
| 123 | <i>Bridelia ferruginea</i>      |         | Rosids                  | W         | T           | P            | 6.60                     | [81]             |
| 124 | <i>Bromus erectus</i>           |         | Monocots                | NW        | G           | P            | 0.92                     | [31]             |
| 125 | <i>Bromus hordeaceus</i>        |         | Monocots                | NW        | G           | A            | 2.23                     | [31]             |
| 126 | <i>Bromus inermis</i>           |         | Monocots                | NW        | G           | P            | 2.59                     | [10, 39, 40, 49] |
| 127 | <i>Bromus kalmii</i>            |         | Monocots                | NW        | G           | P            | 0.87                     | [39, 40]         |
| 128 | <i>Brosimum alicastrum</i>      |         | Rosids                  | W         | T           | P            | 9.23                     | [4, 29]          |
| 129 | <i>Brosimum utile</i>           |         | Rosids                  | W         | T           | P            | 4.90                     | [82]             |
| 130 | <i>Bruguiera cylindrica</i>     |         | Rosids                  | W         | T           | P            | 6.60                     | [34]             |
| 131 | <i>Bruguiera exaristata</i>     |         | Rosids                  | W         | T           | P            | 5.20                     | [9, 34]          |
| 132 | <i>Bruguiera gymnorhiza</i>     |         | Rosids                  | W         | T           | P            | 3.31                     | [9, 34]          |
| 133 | <i>Bruguiera parviflora</i>     |         | Rosids                  | W         | T           | P            | 3.30                     | [9]              |
| 134 | <i>Bunchosia lindeniana</i>     |         | Rosids                  | W         | T           | P            | 18.80                    | [4]              |
| 135 | <i>Burkea africana</i>          |         | Rosids                  | W         | T           | P            | 3.40                     | [81]             |
| 136 | <i>Bursera excelsa</i>          |         | Rosids                  | W         | T           | P            | 12.16                    | [29]             |
| 137 | <i>Bursera heteresthes</i>      |         | Rosids                  | W         | T           | P            | 2.65                     | [83]             |
| 138 | <i>Bursera instabilis</i>       |         | Rosids                  | W         | T           | P            | 8.51                     | [29, 84]         |
| 139 | <i>Bursera simaruba</i>         |         | Rosids                  | W         | T           | P            | 2.05                     | [4, 85]          |

|     | species                         | synonym              | major taxonomic lineage | woodiness | growth form | life-history | mean percent leaf damage | sources of data |
|-----|---------------------------------|----------------------|-------------------------|-----------|-------------|--------------|--------------------------|-----------------|
| 140 | <i>Byrsonima coccolobifolia</i> |                      | Rosids                  | W         | T           | P            | 6.91                     | [64]            |
| 141 | <i>Byrsonima crassa</i>         |                      | Rosids                  | W         | T           | P            | 9.11                     | [64]            |
| 142 | <i>Byrsonima verbascifolia</i>  |                      | Rosids                  | W         | T           | P            | 3.74                     | [64]            |
| 143 | <i>Caesalpinia caladenia</i>    |                      | Rosids                  | W         | S           | P            | 36.03                    | [29]            |
| 144 | <i>Calamus australis</i>        |                      | Monocots                | NW        | V           | P            | 1.20                     | [36]            |
| 145 | <i>Calamus caryotoides</i>      |                      | Monocots                | NW        | V           | P            | 2.20                     | [36]            |
| 146 | <i>Calamus muelleri</i>         |                      | Monocots                | NW        | V           | P            | 7.70                     | [65]            |
| 147 | <i>Calathea cleistantha</i>     |                      | Monocots                | NW        | F           | P            | 2.60                     | [36]            |
| 148 | <i>Calathea latifolia</i>       |                      | Monocots                | NW        | F           | P            | 12.70                    | [36]            |
| 149 | <i>Calathea ovandensis</i>      |                      | Monocots                | NW        | F           | P            | 3.65                     | [86]            |
| 150 | <i>Caldchuvia nymanii</i>       |                      | Rosids                  | NW        | F           | P            | 7.00                     | [32]            |
| 151 | <i>Callicoma serratifolia</i>   |                      | Rosids                  | W         | S           | P            | 12.91                    | [7, 65]         |
| 152 | <i>Calophyllum brasiliense</i>  |                      | Rosids                  | W         | T           | P            | 4.07                     | [4]             |
| 153 | <i>Calycophyllum spruceanum</i> |                      | Asterids                | W         | T           | P            | 11.50                    | [48]            |
| 154 | <i>Camellia fraterna</i>        |                      | Asterids                | W         | S           | P            | 3.17                     | [57, 58]        |
| 155 | <i>Camellia sinensis</i>        |                      | Asterids                | W         | S           | P            | 4.25                     | [12]            |
| 156 | <i>Campanula americanum</i>     |                      | Asterids                | NW        | F           | A            | 6.73                     | [5, 87]         |
| 157 | <i>Campanula rapunculoides</i>  |                      | Asterids                | NW        | F           | P            | 3.99                     | [39, 40]        |
| 158 | <i>Campanula rotundifolia</i>   |                      | Asterids                | NW        | F           | P            | 0.79                     | [10, 39, 40]    |
| 159 | <i>Capsella bursa-pastoris</i>  |                      | Rosids                  | NW        | F           | A            | 0.10                     | [5]             |
| 160 | <i>Caraipa utilis</i>           | <i>Caraipa utile</i> | Rosids                  | W         | T           | P            | 3.90                     | [48]            |
| 161 | <i>Carduus nutans</i>           |                      | Asterids                | NW        | F           | P            | 6.79                     | [5]             |

|     | species                      | synonym                     | major taxonomic lineage | woodiness | growth form | life-history | mean percent leaf damage | sources of data |
|-----|------------------------------|-----------------------------|-------------------------|-----------|-------------|--------------|--------------------------|-----------------|
| 162 | <i>Carex consimilis</i>      | <i>Carex bigelowii</i>      | Monocots                | NW        | G           | P            | 0.24                     | [30]            |
| 163 | <i>Carex plantaginea</i>     |                             | Monocots                | NW        | G           | P            | 4.00                     | [10]            |
| 164 | <i>Carica papaya</i>         |                             | Rosids                  | W         | T           | P            | 5.05                     | [4, 88]         |
| 165 | <i>Carum carvi</i>           |                             | Asterids                | NW        | F           | I            | 0.67                     | [31]            |
| 166 | <i>Carya ovata</i>           |                             | Rosids                  | W         | T           | P            | 13.60                    | [10]            |
| 167 | <i>Cascabela ovata</i>       | <i>Thevetia ovata</i>       | Asterids                | W         | S           | P            | 7.80                     | [29]            |
| 168 | <i>Casearia arborea</i>      |                             | Rosids                  | W         | T           | P            | 0.31                     | [89]            |
| 169 | <i>Casearia NA</i>           |                             | Rosids                  | W         | T           | P            | 11.32                    | [83]            |
| 170 | <i>Casearia nitida</i>       |                             | Rosids                  | W         | T           | P            | 9.66                     | [90]            |
| 171 | <i>Cassia fasciculata</i>    |                             | Rosids                  | NW        | F           | A            | 3.19                     | [5]             |
| 172 | <i>Cassia fruticosa</i>      |                             | Rosids                  | W         | T           | P            | 5.00                     | [62]            |
| 173 | <i>Castanopsis carlesii</i>  |                             | Rosids                  | W         | T           | P            | 3.20                     | [58]            |
| 174 | <i>Castanopsis eyrei</i>     |                             | Rosids                  | W         | T           | P            | 6.31                     | [57, 58]        |
| 175 | <i>Castanopsis fargesii</i>  |                             | Rosids                  | W         | T           | P            | 5.30                     | [58]            |
| 176 | <i>Castanopsis tibetana</i>  |                             | Rosids                  | W         | T           | P            | 3.78                     | [58]            |
| 177 | <i>Castilla elastica</i>     |                             | Rosids                  | W         | T           | P            | 6.29                     | [12, 61]        |
| 178 | <i>Castilleja sulphurea</i>  |                             | Asterids                | NW        | S           | P            | 8.50                     | [10]            |
| 179 | <i>Catalpa speciosa</i>      |                             | Asterids                | W         | T           | P            | 10.30                    | [10]            |
| 180 | <i>Catopsis sessiliflora</i> |                             | Monocots                | NW        | F           | P            | 55.00                    | [91]            |
| 181 | <i>Cecropia insignis</i>     |                             | Rosids                  | W         | T           | P            | 37.40                    | [8]             |
| 182 | <i>Cecropia longipes</i>     |                             | Rosids                  | W         | T           | P            | 4.78                     | [61]            |
| 183 | <i>Cecropia peltata</i>      | <i>Cecropia obtusifolia</i> | Rosids                  | W         | T           | P            | 9.84                     | [4, 61, 89, 92] |
| 184 | <i>Cecropia schreberiana</i> |                             | Rosids                  | W         | T           | P            | 17.00                    | [93]            |
| 185 | <i>Cedrela odorata</i>       |                             | Rosids                  | W         | T           | P            | 5.00                     | [12]            |
| 186 | <i>Ceiba aesculifolia</i>    |                             | Rosids                  | W         | T           | P            | 10.58                    | [29]            |
| 187 | <i>Ceiba grandiflora</i>     |                             | Rosids                  | W         | T           | P            | 11.06                    | [29]            |



|     | species                            | synonym | major taxonomic lineage | woodiness | growth form | life-history | mean percent leaf damage | sources of data |
|-----|------------------------------------|---------|-------------------------|-----------|-------------|--------------|--------------------------|-----------------|
| 188 | <i>Ceiba pentandra</i>             |         | Rosids                  | W         | T           | P            | 9.15                     | [4]             |
| 189 | <i>Celaenodendron mexicanum</i>    |         | Rosids                  | W         | T           | P            | 9.86                     | [83]            |
| 190 | <i>Celastrus orbiculata</i>        |         | Rosids                  | W         | V           | P            | 5.30                     | [10]            |
| 191 | <i>Celtis africana</i>             |         | Rosids                  | W         | T           | P            | 4.00                     | [94]            |
| 192 | <i>Celtis durandii</i>             |         | Rosids                  | W         | T           | P            | 2.00                     | [94]            |
| 193 | <i>Celtis laevigata</i>            |         | Rosids                  | W         | T           | P            | 10.16                    | [95]            |
| 194 | <i>Centaurea jacea</i>             |         | Asterids                | NW        | F           | P            | 1.54                     | [31]            |
| 195 | <i>Cerastium arvense</i>           |         | Other Angiosperms       | NW        | F           | P            | 0.34                     | [39, 40]        |
| 196 | <i>Cerastium fontanum</i>          |         | Other Angiosperms       | NW        | F           | P            | 6.95                     | [39, 40]        |
| 197 | <i>Ceratopetalum apetalum</i>      |         | Rosids                  | W         | T           | P            | 22.45                    | [65]            |
| 198 | <i>Ceratopetalum gummiferum</i>    |         | Rosids                  | W         | T           | P            | 24.90                    | [7]             |
| 199 | <i>Cercis canadensis</i>           |         | Rosids                  | W         | T           | P            | 4.95                     | [19, 20]        |
| 200 | <i>Ceriops australis</i>           |         | Rosids                  | W         | T           | P            | 7.57                     | [9, 34]         |
| 201 | <i>Ceriops decandra</i>            |         | Rosids                  | W         | T           | P            | 6.40                     | [34]            |
| 202 | <i>Ceriops tagal</i>               |         | Rosids                  | W         | T           | P            | 8.60                     | [34]            |
| 203 | <i>Cestrum panamense</i>           |         | Asterids                | W         | S           | P            | 9.40                     | [88]            |
| 204 | <i>Chaetachme aristata</i>         |         | Rosids                  | W         | T           | P            | 4.00                     | [94]            |
| 205 | <i>Chamaecrista debilis</i>        |         | Rosids                  | W         | S           | P            | 77.64                    | [96]            |
| 206 | <i>Chamaecrista fasciculata</i>    |         | Rosids                  | NW        | F           | A            | 7.37                     | [97]            |
| 207 | <i>Chamaedorea alternans</i>       |         | Monocots                | W         | T           | P            | 15.08                    | [98]            |
| 208 | <i>Chamaedorea ernesti-augusti</i> |         | Monocots                | W         | T           | P            | 0.49                     | [98]            |
| 209 | <i>Chamaedorea pinnatifrons</i>    |         | Monocots                | W         | T           | P            | 2.14                     | [98]            |
| 210 | <i>Chamaedorea spp.</i>            |         | Monocots                | W         | T           | P            | 3.50                     | [4]             |

|     | species                        | synonym                        | major taxonomic lineage | woodiness | growth form | life-history | mean percent leaf damage | sources of data |
|-----|--------------------------------|--------------------------------|-------------------------|-----------|-------------|--------------|--------------------------|-----------------|
| 211 | <i>Chamerion angustifolium</i> | <i>Epilobium angustifolium</i> | Rosids                  | NW        | F           | P            | 12.17                    | [10, 30, 53]    |
| 212 | <i>Chenopodium album</i>       |                                | Other Angiosperms       | NW        | F           | A            | 10.47                    | [39]            |
| 213 | <i>Chenopodium simplex</i>     |                                | Other Angiosperms       | NW        | F           | A            | 7.54                     | [39]            |
| 214 | <i>Chomelia ribesioides</i>    |                                | Asterids                | W         | S           | P            | 9.43                     | [64]            |
| 215 | <i>Chrysophyllum cainito</i>   |                                | Asterids                | W         | T           | P            | 8.86                     | [61, 82]        |
| 216 | <i>Chrysophyllum pomiferum</i> |                                | Asterids                | W         | T           | P            | 26.48                    | [99]            |
| 217 | <i>Chrysophyllum spp.</i>      |                                | Asterids                | W         | T           | P            | 8.00                     | [94]            |
| 218 | <i>Chrysothemis pulchella</i>  |                                | Asterids                | NW        | F           | P            | 2.17                     | [62]            |
| 219 | <i>Chusquea simpliciflora</i>  |                                | Monocots                | NW        | V           | P            | 1.80                     | [36]            |
| 220 | <i>Cichorium intybus</i>       |                                | Asterids                | NW        | F           | I            | 22.30                    | [10]            |
| 221 | <i>Cinchona pubescens</i>      |                                | Asterids                | W         | T           | P            | 2.16                     | [12]            |
| 222 | <i>Cinnamomum camphora</i>     |                                | Magnoliids              | W         | T           | P            | 6.92                     | [12]            |
| 223 | <i>Cinnamomum spp.</i>         |                                | Magnoliids              | W         | T           | P            | 6.94                     | [51]            |
| 224 | <i>Cinnamomum subavenium</i>   |                                | Magnoliids              | W         | T           | P            | 4.86                     | [58]            |
| 225 | <i>Cinnamomum verum</i>        |                                | Magnoliids              | W         | T           | P            | 8.25                     | [12]            |
| 226 | <i>Cirsium arvense</i>         |                                | Asterids                | NW        | F           | P            | 13.46                    | [52]            |
| 227 | <i>Cirsium oleraceum</i>       |                                | Asterids                | NW        | F           | P            | 1.32                     | [31]            |
| 228 | <i>Cirsium parryi</i>          |                                | Asterids                | NW        | F           | P            | 16.70                    | [10]            |
| 229 | <i>Cissus hypoglauca</i>       |                                | Rosids                  | W         | V           | P            | 46.05                    | [7]             |
| 230 | <i>Citrus reticulata</i>       |                                | Rosids                  | W         | T           | P            | 38.80                    | [100]           |
| 231 | <i>Citrus sinensis</i>         |                                | Rosids                  | W         | T           | P            | 54.65                    | [100]           |
| 232 | <i>Clibadium sp.</i>           |                                | Asterids                | W         | S           | P            | 4.20                     | [88]            |
| 233 | <i>Clidemia hirta</i>          |                                | Rosids                  | W         | S           | P            | 4.68                     | [12]            |

|     | species                         | synonym | major taxonomic lineage | woodiness | growth form | life-history | mean percent leaf damage | sources of data         |
|-----|---------------------------------|---------|-------------------------|-----------|-------------|--------------|--------------------------|-------------------------|
| 234 | <i>Clusia fockeana</i>          |         | Rosids                  | W         | T           | P            | 4.70                     | [48]                    |
| 235 | <i>Cnestidium rufescens</i>     |         | Rosids                  | W         | V           | P            | 24.65                    | [82]                    |
| 236 | <i>Coccoloba barbadensis</i>    |         | Other Angiosperms       | W         | T           | P            | 17.65                    | [29]                    |
| 237 | <i>Coccoloba uvifera</i>        |         | Other Angiosperms       | W         | S           | P            | 0.79                     | [101]                   |
| 238 | <i>Cochlospermum vitifolium</i> |         | Rosids                  | W         | T           | P            | 4.18                     | [83]                    |
| 239 | <i>Coffea arabica</i>           |         | Asterids                | W         | T           | P            | 2.50                     | [88]                    |
| 240 | <i>Coffea canephora</i>         |         | Asterids                | W         | T           | P            | 5.57                     | [12]                    |
| 241 | <i>Cojoba rufescens</i>         |         | Rosids                  | W         | T           | P            | 32.05                    | [82]                    |
| 242 | <i>Cola nitida</i>              |         | Rosids                  | W         | T           | P            | 8.10                     | [12]                    |
| 243 | <i>Connarus panamensis</i>      |         | Rosids                  | W         | V           | P            | 10.50                    | [82]                    |
| 244 | <i>Connarus schultesii</i>      |         | Rosids                  | W         | V           | P            | 9.50                     | [4]                     |
| 245 | <i>Connarus turczaninowii</i>   |         | Rosids                  | W         | V           | P            | 9.61                     | [102]                   |
| 246 | <i>Conocarpus erectus</i>       |         | Rosids                  | W         | S           | P            | 8.96                     | [103]                   |
| 247 | <i>Conyza canadensis</i>        |         | Asterids                | NW        | F           | I            | 0.10                     | [37]                    |
| 248 | <i>Coprosma quadrifolia</i>     |         | Asterids                | W         | S           | P            | 1.00                     | [65]                    |
| 249 | <i>Cordia alliodora</i>         |         | Asterids                | W         | T           | P            | 7.34                     | [4, 12, 28, 29, 61, 83] |
| 250 | <i>Cordia elaeagnoides</i>      |         | Asterids                | W         | T           | P            | 3.49                     | [83]                    |
| 251 | <i>Cordyline cannifolia</i>     |         | Monocots                | W         | S           | P            | 1.50                     | [36]                    |
| 252 | <i>Cornus alternifolia</i>      |         | Asterids                | W         | T           | P            | 19.80                    | [10]                    |
| 253 | <i>Cornus florida</i>           |         | Asterids                | W         | T           | P            | 2.32                     | [24]                    |
| 254 | <i>Cornus sanguinea</i>         |         | Asterids                | W         | S           | P            | 3.32                     | [104]                   |
| 255 | <i>Corylus americana</i>        |         | Rosids                  | W         | S           | P            | 5.99                     | [23]                    |
| 256 | <i>Costus spicatus</i>          |         | Monocots                | NW        | F           | P            | 8.20                     | [4]                     |
| 257 | <i>Costus spp.</i>              |         | Monocots                | NW        | F           | P            | 9.20                     | [36]                    |

|     | species                       | synonym | major taxonomic lineage | woodiness | growth form | life-history | mean percent leaf damage | sources of data |
|-----|-------------------------------|---------|-------------------------|-----------|-------------|--------------|--------------------------|-----------------|
| 258 | <i>Costus villosissimus</i>   |         | Monocots                | NW        | F           | P            | 9.74                     | [4]             |
| 259 | <i>Couratari calycina</i>     |         | Asterids                | W         | T           | P            | 11.00                    | [48]            |
| 260 | <i>Coussarea curvigemma</i>   |         | Asterids                | W         | T           | P            | 4.40                     | [8]             |
| 261 | <i>Crataegus monogyna</i>     |         | Rosids                  | W         | S           | P            | 5.68                     | [104]           |
| 262 | <i>Crepis biennis</i>         |         | Asterids                | NW        | F           | P            | 4.33                     | [31]            |
| 263 | <i>Crocoshia pottsii</i>      |         | Monocots                | NW        | F           | P            | 0.78                     | [37]            |
| 264 | <i>Crossopteryx febrifuga</i> |         | Asterids                | W         | T           | P            | 6.10                     | [81]            |
| 265 | <i>Croton alamosanus</i>      |         | Rosids                  | W         | S           | P            | 12.84                    | [29]            |
| 266 | <i>Croton argyranthemus</i>   |         | Rosids                  | NW        | F           | P            | 7.27                     | [63]            |
| 267 | <i>Croton goyazensis</i>      |         | Rosids                  | W         | T           | P            | 7.80                     | [64]            |
| 268 | <i>Croton pseudoniveus</i>    |         | Rosids                  | W         | T           | P            | 13.89                    | [29, 83, 84]    |
| 269 | <i>Croton schiedeanus</i>     |         | Rosids                  | W         | T           | P            | 12.70                    | [4]             |
| 270 | <i>Croton suberosus</i>       |         | Rosids                  | W         | S           | P            | 11.93                    | [29]            |
| 271 | <i>Croton saligna</i>         |         | Rosids                  | W         | S           | P            | 38.90                    | [7]             |
| 272 | <i>Culcasia falcifolia</i>    |         | Monocots                | W         | V           | P            | 9.70                     | [36]            |
| 273 | <i>Cupania dentata</i>        |         | Rosids                  | W         | T           | P            | 13.10                    | [4]             |
| 274 | <i>Cuttsia viburnea</i>       |         | Asterids                | W         | S           | P            | 8.90                     | [65]            |
| 275 | <i>Cyclanthus bipartitus</i>  |         | Monocots                | NW        | F           | P            | 22.20                    | [36]            |
| 276 | <i>Cymbopetalum baillonii</i> |         | Magnoliids              | W         | T           | P            | 3.80                     | [4]             |
| 277 | <i>Cynometra iripa</i>        |         | Rosids                  | W         | T           | P            | 19.70                    | [9]             |
| 278 | <i>Cynometra oaxacana</i>     |         | Rosids                  | W         | T           | P            | 19.20                    | [29]            |
| 279 | <i>Cynometra retusa</i>       |         | Rosids                  | W         | T           | P            | 6.50                     | [4]             |
| 280 | <i>Cystopteris fragilis</i>   |         | Ferns                   | NW        | F           | P            | 6.90                     | [1]             |
| 281 | <i>Dacryodes excelsa</i>      |         | Rosids                  | W         | T           | P            | 0.68                     | [89]            |
| 282 | <i>Dactylis glomerata</i>     |         | Monocots                | NW        | G           | P            | 1.58                     | [31, 41]        |

|     | species                          | synonym                       | major taxonomic lineage | woodiness | growth form | life-history | mean percent leaf damage | sources of data |
|-----|----------------------------------|-------------------------------|-------------------------|-----------|-------------|--------------|--------------------------|-----------------|
| 283 | <i>Dalbergia retusa</i>          |                               | Rosids                  | W         | T           | P            | 1.86                     | [47]            |
| 284 | <i>Dalbergia spp.</i>            |                               | Rosids                  | W         | V           | P            | 2.01                     | [51]            |
| 285 | <i>Dalechampia caperonioides</i> |                               | Rosids                  | NW        | F           | P            | 2.68                     | [64]            |
| 286 | <i>Daphne laureola</i>           |                               | Rosids                  | W         | S           | P            | 4.30                     | [105]           |
| 287 | <i>Daphniphyllum oldhamii</i>    |                               | Other Angiosperms       | W         | T           | P            | 5.29                     | [58]            |
| 288 | <i>Darwinia fascicularis</i>     |                               | Rosids                  | W         | S           | P            | 36.11                    | [7]             |
| 289 | <i>Datura stramonium</i>         |                               | Asterids                | NW        | F           | A            | 0.24                     | [5]             |
| 290 | <i>Daucus carota</i>             |                               | Asterids                | NW        | F           | I            | 4.23                     | [10, 31]        |
| 291 | <i>Decodon verticillatus</i>     |                               | Rosids                  | W         | S           | P            | 1.08                     | [5]             |
| 292 | <i>Delphinium barbeyi</i>        |                               | Other Angiosperms       | NW        | F           | P            | 6.70                     | [10]            |
| 293 | <i>Delphinium nelsonii</i>       |                               | Other Angiosperms       | NW        | F           | P            | 16.20                    | [53]            |
| 294 | <i>Dendrocnide excelsa</i>       |                               | Rosids                  | W         | T           | P            | 32.50                    | [65]            |
| 295 | <i>Dendropanax umbellatus</i>    |                               | Asterids                | W         | T           | P            | 1.90                     | [48]            |
| 296 | <i>Deschampsia nubigena</i>      |                               | Monocots                | NW        | G           | P            | 0.10                     | [37]            |
| 297 | <i>Desmodium sandwicense</i>     |                               | Rosids                  | W         | S           | P            | 1.31                     | [37]            |
| 298 | <i>Desmoncus orthacanthos</i>    | <i>Desmoncus orthocanthos</i> | Monocots                | W         | V           | P            | 16.70                    | [36]            |
| 299 | <i>Detarium microcarpum</i>      |                               | Rosids                  | W         | T           | P            | 8.70                     | [81]            |
| 300 | <i>Dialium guianense</i>         |                               | Rosids                  | W         | T           | P            | 5.81                     | [106]           |
| 301 | <i>Dicksonia antarctica</i>      |                               | Ferns                   | NW        | T           | P            | 5.00                     | [65]            |
| 302 | <i>Didymocistus chrysadenius</i> |                               | Rosids                  | W         | T           | P            | 17.00                    | [48]            |
| 303 | <i>Diospyros abyssinica</i>      |                               | Asterids                | W         | T           | P            | 3.00                     | [94]            |
| 304 | <i>Diospyros virginiana</i>      |                               | Asterids                | W         | T           | P            | 12.36                    | [63]            |

|     | species                        | synonym | major taxonomic lineage | woodiness | growth form | life-history | mean percent leaf damage | sources of data |
|-----|--------------------------------|---------|-------------------------|-----------|-------------|--------------|--------------------------|-----------------|
| 305 | <i>Diplazium expansum</i>      |         | Ferns                   | NW        | F           | P            | 10.84                    | [74]            |
| 306 | <i>Dodonaea triquetra</i>      |         | Rosids                  | W         | S           | P            | 32.00                    | [7]             |
| 307 | <i>Dodonaea viscosa</i>        |         | Rosids                  | W         | S           | P            | 1.56                     | [37]            |
| 308 | <i>Doliocarpus major</i>       |         | Other Angiosperms       | W         | V           | P            | 1.23                     | [61]            |
| 309 | <i>Doryphora sassafras</i>     |         | Magnoliids              | W         | T           | P            | 16.47                    | [65]            |
| 310 | <i>Dracaena fragrans</i>       |         | Monocots                | W         | S           | P            | 5.10                     | [36]            |
| 311 | <i>Dracaena laxissima</i>      |         | Monocots                | W         | S           | P            | 8.70                     | [36]            |
| 312 | <i>Dryas octopetala</i>        |         | Rosids                  | NW        | S           | P            | 0.00                     | [30]            |
| 313 | <i>Dryobalanops lanceolata</i> |         | Rosids                  | W         | T           | P            | 2.97                     | [107-109]       |
| 314 | <i>Dubautia scabra</i>         |         | Asterids                | W         | S           | P            | 0.00                     | [37]            |
| 315 | <i>Dussia mexicana</i>         |         | Rosids                  | W         | T           | P            | 18.86                    | [4]             |
| 316 | <i>Elaeocarpus ptilanthus</i>  |         | Rosids                  | W         | T           | P            | 4.80                     | [32]            |
| 317 | <i>Elaeocarpus sayeri</i>      |         | Rosids                  | W         | T           | P            | 9.70                     | [32]            |
| 318 | <i>Elattostachys nervosa</i>   |         | Rosids                  | W         | T           | P            | 6.70                     | [65]            |
| 319 | <i>Elymus canadensis</i>       |         | Monocots                | NW        | G           | P            | 5.18                     | [49]            |
| 320 | <i>Elymus glaucus</i>          |         | Monocots                | NW        | G           | P            | 16.50                    | [10]            |
| 321 | <i>Elymus repens</i>           |         | Monocots                | NW        | G           | P            | 2.47                     | [39, 40]        |
| 322 | <i>Epacris tubiflora</i>       |         | Asterids                | W         | S           | P            | 63.30                    | [7]             |
| 323 | <i>Eperua grandiflora</i>      |         | Rosids                  | W         | T           | P            | 1.00                     | [48]            |
| 324 | <i>Eragrostis variabilis</i>   |         | Monocots                | NW        | G           | P            | 1.06                     | [37]            |
| 325 | <i>Erigeron annuus</i>         |         | Asterids                | NW        | F           | A            | 2.36                     | [5]             |
| 326 | <i>Erigeron speciosus</i>      |         | Asterids                | NW        | F           | P            | 3.95                     | [53]            |
| 327 | <i>Erigeron strigosus</i>      |         | Asterids                | NW        | F           | P            | 1.20                     | [44]            |
| 328 | <i>Eriogonum tomentosum</i>    |         | Other Angiosperms       | NW        | F           | P            | 13.82                    | [63]            |
| 329 | <i>Eriogonum umbellatum</i>    |         | Other Angiosperms       | W         | S           | P            | 0.60                     | [10]            |

|     | species                         | synonym | major taxonomic lineage | woodiness | growth form | life-history | mean percent leaf damage | sources of data |
|-----|---------------------------------|---------|-------------------------|-----------|-------------|--------------|--------------------------|-----------------|
| 330 | <i>Eriostemon australasius</i>  |         | Rosids                  | W         | S           | P            | 13.70                    | [7]             |
| 331 | <i>Eriotheca globosa</i>        |         | Rosids                  | W         | T           | P            | 3.10                     | [48]            |
| 332 | <i>Eriotheca longitubulosa</i>  |         | Rosids                  | W         | T           | P            | 7.60                     | [48]            |
| 333 | <i>Eriotheca sp.</i>            |         | Rosids                  | W         | T           | P            | 28.74                    | [110]           |
| 334 | <i>Erisma bicolor</i>           |         | Rosids                  | W         | T           | P            | 5.00                     | [48]            |
| 335 | <i>Erythrina abyssinica</i>     |         | Rosids                  | W         | T           | P            | 2.00                     | [94]            |
| 336 | <i>Erythrina poeppigiana</i>    |         | Rosids                  | W         | T           | P            | 5.50                     | [88]            |
| 337 | <i>Erythrina sandwicensis</i>   |         | Rosids                  | W         | T           | P            | 12.66                    | [37]            |
| 338 | <i>Erythroxylum campestre</i>   |         | Rosids                  | W         | S           | P            | 4.47                     | [64]            |
| 339 | <i>Erythroxylum deciduum</i>    |         | Rosids                  | W         | S           | P            | 6.91                     | [64]            |
| 340 | <i>Erythroxylum mexicanum</i>   |         | Rosids                  | W         | T           | P            | 8.00                     | [29]            |
| 341 | <i>Erythroxylum suberosum</i>   |         | Rosids                  | W         | T           | P            | 13.25                    | [64]            |
| 342 | <i>Erythroxylum tortuosum</i>   |         | Rosids                  | W         | T           | P            | 2.93                     | [64]            |
| 343 | <i>Eucalyptus accedens</i>      |         | Rosids                  | W         | T           | P            | 10.46                    | [111, 112]      |
| 344 | <i>Eucalyptus amplifolia</i>    |         | Rosids                  | W         | T           | P            | 16.00                    | [111]           |
| 345 | <i>Eucalyptus blakelyi</i>      |         | Rosids                  | W         | T           | P            | 17.50                    | [50, 111]       |
| 346 | <i>Eucalyptus botryoides</i>    |         | Rosids                  | W         | T           | P            | 13.87                    | [111, 113]      |
| 347 | <i>Eucalyptus bridgesiana</i>   |         | Rosids                  | W         | T           | P            | 21.00                    | [111]           |
| 348 | <i>Eucalyptus caliginosa</i>    |         | Rosids                  | W         | T           | P            | 22.90                    | [50]            |
| 349 | <i>Eucalyptus calophylla</i>    |         | Rosids                  | W         | T           | P            | 0.00                     | [114]           |
| 350 | <i>Eucalyptus camaldulensis</i> |         | Rosids                  | W         | T           | P            | 10.00                    | [111]           |

|     | species                         | synonym | major taxonomic lineage | woodiness | growth form | life-history | mean percent leaf damage | sources of data |
|-----|---------------------------------|---------|-------------------------|-----------|-------------|--------------|--------------------------|-----------------|
| 351 | <i>Eucalyptus campaspe</i>      |         | Rosids                  | W         | T           | P            | 15.00                    | [111]           |
| 352 | <i>Eucalyptus camphora</i>      |         | Rosids                  | W         | T           | P            | 40.00                    | [111]           |
| 353 | <i>Eucalyptus cinerea</i>       |         | Rosids                  | W         | T           | P            | 24.50                    | [111]           |
| 354 | <i>Eucalyptus crebra</i>        |         | Rosids                  | W         | T           | P            | 9.00                     | [111]           |
| 355 | <i>Eucalyptus dalrympleana</i>  |         | Rosids                  | W         | T           | P            | 22.80                    | [50, 111]       |
| 356 | <i>Eucalyptus decipiens</i>     |         | Rosids                  | W         | T           | P            | 0.25                     | [114]           |
| 357 | <i>Eucalyptus delegatensis</i>  |         | Rosids                  | W         | T           | P            | 4.03                     | [115]           |
| 358 | <i>Eucalyptus diversicolor</i>  |         | Rosids                  | W         | T           | P            | 0.95                     | [114]           |
| 359 | <i>Eucalyptus dives</i>         |         | Rosids                  | W         | T           | P            | 12.48                    | [111, 115]      |
| 360 | <i>Eucalyptus drummondii</i>    |         | Rosids                  | W         | T           | P            | 22.00                    | [111]           |
| 361 | <i>Eucalyptus elata</i>         |         | Rosids                  | W         | T           | P            | 13.00                    | [111]           |
| 362 | <i>Eucalyptus fastigata</i>     |         | Rosids                  | W         | T           | P            | 14.50                    | [111]           |
| 363 | <i>Eucalyptus fibrosa</i>       |         | Rosids                  | W         | T           | P            | 15.00                    | [111]           |
| 364 | <i>Eucalyptus foecunda</i>      |         | Rosids                  | W         | T           | P            | 9.00                     | [111]           |
| 365 | <i>Eucalyptus globulus</i>      |         | Rosids                  | W         | T           | P            | 24.73                    | [116]           |
| 366 | <i>Eucalyptus gomphocephala</i> |         | Rosids                  | W         | T           | P            | 6.70                     | [113]           |
| 367 | <i>Eucalyptus griffithsii</i>   |         | Rosids                  | W         | T           | P            | 15.00                    | [111]           |
| 368 | <i>Eucalyptus gullickii</i>     |         | Rosids                  | W         | T           | P            | 6.00                     | [111]           |
| 369 | <i>Eucalyptus gummifera</i>     |         | Rosids                  | W         | T           | P            | 9.67                     | [111]           |
| 370 | <i>Eucalyptus haemastoma</i>    |         | Rosids                  | W         | T           | P            | 56.80                    | [7]             |
| 371 | <i>Eucalyptus macrorhyncha</i>  |         | Rosids                  | W         | T           | P            | 16.00                    | [111]           |
| 372 | <i>Eucalyptus mannifera</i>     |         | Rosids                  | W         | T           | P            | 10.00                    | [111]           |
| 373 | <i>Eucalyptus marginata</i>     |         | Rosids                  | W         | T           | P            | 13.02                    | [112-114]       |



|     | species                        | synonym | major taxonomic lineage | woodiness | growth form | life-history | mean percent leaf damage | sources of data |
|-----|--------------------------------|---------|-------------------------|-----------|-------------|--------------|--------------------------|-----------------|
| 374 | <i>Eucalyptus megacarpa</i>    |         | Rosids                  | W         | T           | P            | 0.15                     | [114]           |
| 375 | <i>Eucalyptus melliodora</i>   |         | Rosids                  | W         | T           | P            | 22.60                    | [50, 111]       |
| 376 | <i>Eucalyptus microcorys</i>   |         | Rosids                  | W         | T           | P            | 9.00                     | [111]           |
| 377 | <i>Eucalyptus molluccana</i>   |         | Rosids                  | W         | T           | P            | 18.00                    | [111]           |
| 378 | <i>Eucalyptus nova-anglica</i> |         | Rosids                  | W         | T           | P            | 50.25                    | [50, 111]       |
| 379 | <i>Eucalyptus obliqua</i>      |         | Rosids                  | W         | T           | P            | 11.00                    | [111]           |
| 380 | <i>Eucalyptus obtusiflora</i>  |         | Rosids                  | W         | T           | P            | 8.00                     | [111]           |
| 381 | <i>Eucalyptus patens</i>       |         | Rosids                  | W         | T           | P            | 3.97                     | [114]           |
| 382 | <i>Eucalyptus pauciflora</i>   |         | Rosids                  | W         | T           | P            | 23.76                    | [111, 115]      |
| 383 | <i>Eucalyptus perriniana</i>   |         | Rosids                  | W         | T           | P            | 23.40                    | [111]           |
| 384 | <i>Eucalyptus pilularis</i>    |         | Rosids                  | W         | T           | P            | 13.00                    | [111]           |
| 385 | <i>Eucalyptus polyanthemos</i> |         | Rosids                  | W         | T           | P            | 36.00                    | [111]           |
| 386 | <i>Eucalyptus pulverulenta</i> |         | Rosids                  | W         | T           | P            | 28.00                    | [111]           |
| 387 | <i>Eucalyptus racemosa</i>     |         | Rosids                  | W         | T           | P            | 8.00                     | [111]           |
| 388 | <i>Eucalyptus radiata</i>      |         | Rosids                  | W         | T           | P            | 9.77                     | [50, 111]       |
| 389 | <i>Eucalyptus resinifera</i>   |         | Rosids                  | W         | T           | P            | 3.86                     | [112]           |
| 390 | <i>Eucalyptus rossii</i>       |         | Rosids                  | W         | T           | P            | 12.00                    | [111]           |
| 391 | <i>Eucalyptus rubida</i>       |         | Rosids                  | W         | T           | P            | 15.00                    | [111]           |
| 392 | <i>Eucalyptus rudis</i>        |         | Rosids                  | W         | T           | P            | 5.86                     | [114]           |
| 393 | <i>Eucalyptus sclerophylla</i> |         | Rosids                  | W         | T           | P            | 13.00                    | [111]           |
| 394 | <i>Eucalyptus sideroxylon</i>  |         | Rosids                  | W         | T           | P            | 8.00                     | [111]           |
| 395 | <i>Eucalyptus sieberi</i>      |         | Rosids                  | W         | T           | P            | 10.00                    | [111]           |
| 396 | <i>Eucalyptus st</i>           |         | Rosids                  | W         | T           | P            | 29.50                    | [111]           |

|     | species                        | synonym | major taxonomic lineage | woodiness | growth form | life-history | mean percent leaf damage | sources of data  |
|-----|--------------------------------|---------|-------------------------|-----------|-------------|--------------|--------------------------|------------------|
| 397 | <i>Eucalyptus stellulata</i>   |         | Rosids                  | W         | T           | P            | 40.82                    | [50, 111]        |
| 398 | <i>Eucalyptus tereticornis</i> |         | Rosids                  | W         | T           | P            | 17.00                    | [111]            |
| 399 | <i>Eucalyptus triflora</i>     |         | Rosids                  | W         | T           | P            | 12.00                    | [111]            |
| 400 | <i>Eucalyptus umbra</i>        |         | Rosids                  | W         | T           | P            | 46.31                    | [7]              |
| 401 | <i>Eucalyptus viminalis</i>    |         | Rosids                  | W         | T           | P            | 27.60                    | [50, 111]        |
| 402 | <i>Eucalyptus wandoo</i>       |         | Rosids                  | W         | T           | P            | 0.67                     | [114]            |
| 403 | <i>Eucalyptus youmanii</i>     |         | Rosids                  | W         | T           | P            | 14.30                    | [50]             |
| 404 | <i>Eugenia ochneocarpa</i>     |         | Rosids                  | W         | T           | P            | 5.16                     | [67]             |
| 405 | <i>Eugenia spp.</i>            |         | Rosids                  | W         | T           | P            | 10.60                    | [4, 12]          |
| 406 | <i>Euonymus alatus</i>         |         | Rosids                  | W         | S           | P            | 4.30                     | [10]             |
| 407 | <i>Euonymus europaeus</i>      |         | Rosids                  | W         | S           | P            | 16.67                    | [104]            |
| 408 | <i>Eurya muricata</i>          |         | Asterids                | W         | S           | P            | 4.31                     | [57, 58]         |
| 409 | <i>Eurya rubiginosa</i>        |         | Asterids                | W         | S           | P            | 2.84                     | [58]             |
| 410 | <i>Euthamia graminifolia</i>   |         | Asterids                | NW        | F           | P            | 1.90                     | [44]             |
| 411 | <i>Excoecaria agallocha</i>    |         | Rosids                  | W         | T           | P            | 0.95                     | [9, 34]          |
| 412 | <i>Fagus crenata</i>           |         | Rosids                  | W         | T           | P            | 1.93                     | [117]            |
| 413 | <i>Fagus grandifolia</i>       |         | Rosids                  | W         | T           | P            | 6.05                     | [10, 22, 26, 95] |
| 414 | <i>Fagus sylvatica</i>         |         | Rosids                  | W         | T           | P            | 4.83                     | [15, 118, 119]   |
| 415 | <i>Faramea occidentalis</i>    |         | Asterids                | W         | T           | P            | 16.70                    | [4, 8, 82]       |
| 416 | <i>Festuca altaica</i>         |         | Monocots                | NW        | G           | P            | 0.00                     | [30]             |
| 417 | <i>Festuca campestris</i>      |         | Monocots                | NW        | G           | P            | 0.54                     | [30]             |
| 418 | <i>Festuca pratensis</i>       |         | Monocots                | NW        | G           | P            | 1.31                     | [31]             |
| 419 | <i>Festuca rubra</i>           |         | Monocots                | NW        | G           | P            | 1.56                     | [31, 41]         |
| 420 | <i>Ficus cotinifolia</i>       |         | Rosids                  | W         | T           | P            | 12.50                    | [29]             |
| 421 | <i>Ficus insipida</i>          |         | Rosids                  | W         | T           | P            | 1.35                     | [61]             |

|     | species                          | synonym | major taxonomic lineage | woodiness | growth form | life-history | mean percent leaf damage | sources of data  |
|-----|----------------------------------|---------|-------------------------|-----------|-------------|--------------|--------------------------|------------------|
| 422 | <i>Fragaria ovalis</i>           |         | Rosids                  | NW        | F           | P            | 9.85                     | [53]             |
| 423 | <i>Fragaria virginiana</i>       |         | Rosids                  | NW        | F           | P            | 4.63                     | [10, 23]         |
| 424 | <i>Fraxinus pennsylvanica</i>    |         | Asterids                | W         | T           | P            | 5.00                     | [26]             |
| 425 | <i>Freycinetia excelsa</i>       |         | Monocots                | W         | V           | P            | 0.00                     | [36]             |
| 426 | <i>Freycinetia spp.</i>          |         | Monocots                | W         | V           | P            | 1.20                     | [51]             |
| 427 | <i>Funtumia latifolia</i>        |         | Asterids                | W         | T           | P            | 9.00                     | [94]             |
| 428 | <i>Galium biflorum</i>           |         | Asterids                | NW        | F           | P            | 2.40                     | [53]             |
| 429 | <i>Galium boreale</i>            |         | Asterids                | NW        | F           | P            | 4.91                     | [10, 30, 39, 40] |
| 430 | <i>Galium mollugo</i>            |         | Asterids                | NW        | F           | P            | 0.88                     | [31]             |
| 431 | <i>Galium verum</i>              |         | Asterids                | NW        | V           | P            | 0.55                     | [39, 40]         |
| 432 | <i>Garcinia edulis</i>           |         | Rosids                  | W         | T           | P            | 7.33                     | [4, 8]           |
| 433 | <i>Gentiana parryi</i>           |         | Asterids                | NW        | F           | P            | 1.80                     | [10]             |
| 434 | <i>Geonoma congesta</i>          |         | Monocots                | W         | S           | P            | 13.40                    | [36]             |
| 435 | <i>Geranium pratense</i>         |         | Rosids                  | NW        | F           | P            | 1.11                     | [31]             |
| 436 | <i>Geranium richardsonii</i>     |         | Rosids                  | NW        | F           | P            | 3.40                     | [10]             |
| 437 | <i>Geum aleppicum</i>            |         | Rosids                  | NW        | F           | P            | 12.04                    | [39, 40]         |
| 438 | <i>Geum urbanum</i>              |         | Rosids                  | NW        | F           | P            | 8.87                     | [39, 40]         |
| 439 | <i>Glechoma hederacea</i>        |         | Asterids                | NW        | F           | P            | 2.96                     | [31]             |
| 440 | <i>Gloeospermum equatoriense</i> |         | Rosids                  | W         | T           | P            | 5.60                     | [48]             |
| 441 | <i>Glycine max</i>               |         | Rosids                  | NW        | F           | A            | 44.05                    | [120, 121]       |
| 442 | <i>Glycine tabacina</i>          |         | Rosids                  | NW        | F           | P            | 66.15                    | [7]              |
| 443 | <i>Gmelina spp.</i>              |         | Asterids                | W         | T           | P            | 2.40                     | [51]             |
| 444 | <i>Gonystylus spp.</i>           |         | Rosids                  | W         | T           | P            | 1.74                     | [51]             |
| 445 | <i>Gossypium thurberi</i>        |         | Rosids                  | W         | S           | P            | 5.16                     | [122]            |
| 446 | <i>Gouania lupuloides</i>        |         | Rosids                  | NW        | V           | P            | 8.71                     | [61]             |

|     | species                           | synonym                                    | major taxonomic lineage | woodiness | growth form | life-history | mean percent leaf damage | sources of data |
|-----|-----------------------------------|--------------------------------------------|-------------------------|-----------|-------------|--------------|--------------------------|-----------------|
| 447 | <i>Grevillea buxifolia</i>        |                                            | Other Angiosperms       | W         | S           | P            | 5.67                     | [7]             |
| 448 | <i>Grevillea sericea</i>          |                                            | Other Angiosperms       | W         | S           | P            | 21.42                    | [7]             |
| 449 | <i>Grevillea speciosa</i>         |                                            | Other Angiosperms       | W         | S           | P            | 1.06                     | [7]             |
| 450 | <i>Guapira macrocarpa</i>         |                                            | Other Angiosperms       | W         | T           | P            | 10.67                    | [28, 29]        |
| 451 | <i>Guapira</i> spp.               |                                            | Other Angiosperms       | W         | T           | P            | 13.36                    | [83]            |
| 452 | <i>Guarea glabra</i>              |                                            | Rosids                  | W         | T           | P            | 18.30                    | [4]             |
| 453 | <i>Guatteria conspicua</i>        |                                            | Magnoliids              | W         | T           | P            | 2.80                     | [48]            |
| 454 | <i>Guettarda elliptica</i>        |                                            | Asterids                | W         | S           | P            | 10.52                    | [28, 29]        |
| 455 | <i>Gunnera mexicana</i>           |                                            | Other Angiosperms       | NW        | F           | P            | 4.00                     | [70]            |
| 456 | <i>Gymnocarpium dryopteris</i>    |                                            | Ferns                   | NW        | F           | P            | 4.85                     | [1]             |
| 457 | <i>Gyrocarpus jatrophifolius</i>  |                                            | Magnoliids              | W         | T           | P            | 73.68                    | [29]            |
| 458 | <i>Hakea dactyloides</i>          |                                            | Other Angiosperms       | W         | S           | P            | 22.20                    | [7]             |
| 459 | <i>Hakea gibbosa</i>              |                                            | Other Angiosperms       | W         | S           | P            | 13.67                    | [7]             |
| 460 | <i>Hakea teretifolia</i>          |                                            | Other Angiosperms       | W         | S           | P            | 39.30                    | [7]             |
| 461 | <i>Hamelia longipes</i>           |                                            | Asterids                | W         | T           | P            | 13.30                    | [4]             |
| 462 | <i>Hampea appendiculata</i>       |                                            | Rosids                  | W         | T           | P            | 23.28                    | [123]           |
| 463 | <i>Hanguana malayana</i>          |                                            | Monocots                | NW        | F           | P            | 0.51                     | [36]            |
| 464 | <i>Hardenbergia violacea</i>      |                                            | Rosids                  | W         | V           | P            | 86.05                    | [7]             |
| 465 | <i>Helianthella quinquenervis</i> |                                            | Asterids                | NW        | F           | P            | 12.47                    | [10, 53]        |
| 466 | <i>Heliconia catheta</i>          |                                            | Monocots                | NW        | F           | P            | 8.20                     | [36]            |
| 467 | <i>Heliconia irrasa</i>           |                                            | Monocots                | NW        | F           | P            | 6.50                     | [36]            |
| 468 | <i>Heliconia metallica</i>        |                                            | Monocots                | NW        | F           | P            | 2.80                     | [36]            |
| 469 | <i>Helictotrichon pubescens</i>   | <i>Avenula pubescens</i> ,<br><i>Avena</i> | Monocots                | NW        | G           | P            | 2.46                     | [31]            |

|     | species                           | synonym                     | major taxonomic lineage | woodiness | growth form | life-history | mean percent leaf damage | sources of data |
|-----|-----------------------------------|-----------------------------|-------------------------|-----------|-------------|--------------|--------------------------|-----------------|
|     |                                   | <i>pubescens</i>            |                         |           |             |              |                          |                 |
| 470 | <i>Heliocarpus appendiculatus</i> |                             | Rosids                  | W         | T           | P            | 51.87                    | [4, 92]         |
| 471 | <i>Heliocarpus pallidus</i>       |                             | Rosids                  | W         | T           | P            | 12.19                    | [29, 83, 124]   |
| 472 | <i>Henriettella caudata</i>       |                             | Rosids                  | W         | T           | P            | 7.98                     | [125]           |
| 473 | <i>Hepatica nobilis</i>           |                             | Other Angiosperms       | NW        | F           | P            | 7.60                     | [10]            |
| 474 | <i>Heracleum sphondylium</i>      |                             | Asterids                | NW        | F           | P            | 1.28                     | [31]            |
| 475 | <i>Heritiera littoralis</i>       |                             | Rosids                  | W         | T           | P            | 26.30                    | [9, 34]         |
| 476 | <i>Heteropogon contortus</i>      |                             | Monocots                | NW        | G           | P            | 0.00                     | [37]            |
| 477 | <i>Heuchera parvifolia</i>        |                             | Other Angiosperms       | NW        | F           | P            | 3.10                     | [10]            |
| 478 | <i>Hevea brasiliensis</i>         |                             | Rosids                  | W         | T           | P            | 1.23                     | [12]            |
| 479 | <i>Hevea guianensis</i>           | <i>Hevea guianense</i>      | Rosids                  | W         | T           | P            | 9.10                     | [110]           |
| 480 | <i>Hevea parviflora</i>           | <i>Hevea cf. parviflora</i> | Rosids                  | W         | T           | P            | 7.87                     | [110]           |
| 481 | <i>Hibbertia dentata</i>          |                             | Other Angiosperms       | W         | V           | P            | 29.60                    | [7]             |
| 482 | <i>Hibbertia linearis</i>         |                             | Other Angiosperms       | W         | S           | P            | 25.70                    | [7]             |
| 483 | <i>Hibbertia obtusifolia</i>      |                             | Other Angiosperms       | W         | S           | P            | 11.34                    | [7]             |
| 484 | <i>Hirtella racemosa</i>          |                             | Rosids                  | W         | T           | P            | 11.60                    | [48]            |
| 485 | <i>Holcus lanatus</i>             |                             | Monocots                | NW        | G           | P            | 0.57                     | [31, 37]        |
| 486 | <i>Hopea beccariana</i>           |                             | Rosids                  | W         | T           | P            | 5.04                     | [126]           |
| 487 | <i>Hopea nervosa</i>              |                             | Rosids                  | W         | T           | P            | 17.39                    | [109, 126]      |
| 488 | <i>Hordeum vulgare</i>            |                             | Monocots                | NW        | G           | A            | 0.00                     | [5]             |
| 489 | <i>Hura crepitans</i>             |                             | Rosids                  | W         | T           | P            | 4.33                     | [12]            |
| 490 | <i>Hybanthus prunifolius</i>      |                             | Rosids                  | W         | S           | P            | 14.51                    | [8]             |
| 491 | <i>Hydnocarpus pentandra</i>      |                             | Rosids                  | W         | T           | P            | 6.16                     | [12]            |
| 492 | <i>Hymenaea courbaril</i>         |                             | Rosids                  | W         | T           | P            | 15.35                    | [82]            |

|     | species                     | synonym                | major taxonomic lineage | woodiness | growth form | life-history | mean percent leaf damage | sources of data |
|-----|-----------------------------|------------------------|-------------------------|-----------|-------------|--------------|--------------------------|-----------------|
| 493 | <i>Hypericum perforatum</i> |                        | Rosids                  | NW        | F           | P            | 1.77                     | [5]             |
| 494 | <i>Hypochaeris radicata</i> |                        | Asterids                | NW        | F           | P            | 0.31                     | [37]            |
| 495 | <i>Hyptis saxatilis</i>     |                        | Asterids                | W         | S           | P            | 5.12                     | [64]            |
| 496 | <i>Ilex paraguariensis</i>  |                        | Asterids                | W         | T           | P            | 3.74                     | [12]            |
| 497 | <i>Impatiens capensis</i>   |                        | Asterids                | NW        | F           | A            | 2.01                     | [5]             |
| 498 | <i>Inga acuminata</i>       |                        | Rosids                  | W         | T           | P            | 23.30                    | [127]           |
| 499 | <i>Inga cocleensis</i>      |                        | Rosids                  | W         | T           | P            | 23.60                    | [127]           |
| 500 | <i>Inga goldmanii</i>       |                        | Rosids                  | W         | T           | P            | 22.80                    | [127, 128]      |
| 501 | <i>Inga heterophylla</i>    |                        | Rosids                  | W         | T           | P            | 5.00                     | [48]            |
| 502 | <i>Inga laurina</i>         |                        | Rosids                  | W         | T           | P            | 31.40                    | [127]           |
| 503 | <i>Inga marginata</i>       |                        | Rosids                  | W         | T           | P            | 30.07                    | [82, 127]       |
| 504 | <i>Inga multijuga</i>       |                        | Rosids                  | W         | T           | P            | 42.50                    | [127]           |
| 505 | <i>Inga nobilis</i>         |                        | Rosids                  | W         | T           | P            | 24.30                    | [127]           |
| 506 | <i>Inga pezizifera</i>      |                        | Rosids                  | W         | T           | P            | 18.30                    | [48, 127]       |
| 507 | <i>Inga sapindoides</i>     |                        | Rosids                  | W         | T           | P            | 22.40                    | [127]           |
| 508 | <i>Inga semialata</i>       |                        | Rosids                  | W         | T           | P            | 7.90                     | [48]            |
| 509 | <i>Inga spp.</i>            |                        | Rosids                  | W         | T           | P            | 8.15                     | [4, 48]         |
| 510 | <i>Inga stipularis</i>      |                        | Rosids                  | W         | T           | P            | 16.55                    | [48]            |
| 511 | <i>Inga thibaudiana</i>     |                        | Rosids                  | W         | T           | P            | 25.00                    | [48]            |
| 512 | <i>Inga umbellifera</i>     |                        | Rosids                  | W         | T           | P            | 17.60                    | [48, 127, 128]  |
| 513 | <i>Inga vera</i>            |                        | Rosids                  | W         | T           | P            | 26.20                    | [93, 127]       |
| 514 | <i>Ipomoea hederacea</i>    |                        | Asterids                | NW        | V           | A            | 11.35                    | [5]             |
| 515 | <i>Ipomoea purpurea</i>     |                        | Asterids                | NW        | V           | A            | 3.65                     | [5]             |
| 516 | <i>Ipomoea spp.</i>         |                        | Asterids                | W         | T           | P            | 10.10                    | [88]            |
| 517 | <i>Ipomoea wolcottiana</i>  |                        | Asterids                | W         | T           | P            | 27.70                    | [29, 83]        |
| 518 | <i>Ipomopsis aggregata</i>  | <i>Gilia aggregata</i> | Asterids                | NW        | F           | I            | 2.50                     | [10]            |

|     | species                         | synonym | major taxonomic lineage | woodiness | growth form | life-history | mean percent leaf damage | sources of data |
|-----|---------------------------------|---------|-------------------------|-----------|-------------|--------------|--------------------------|-----------------|
| 519 | <i>Iris missouriensis</i>       |         | Monocots                | NW        | F           | P            | 1.20                     | [10]            |
| 520 | <i>Isachne distichophylla</i>   |         | Monocots                | NW        | G           | P            | 0.58                     | [37]            |
| 521 | <i>Isopogon anethifolius</i>    |         | Other Angiosperms       | W         | S           | P            | 28.54                    | [7]             |
| 522 | <i>Iva frutescens</i>           |         | Asterids                | W         | S           | P            | 4.23                     | [68]            |
| 523 | <i>Jacquiniella leucomelana</i> |         | Monocots                | NW        | F           | P            | 52.00                    | [91]            |
| 524 | <i>Jacquiniella teretifolia</i> |         | Monocots                | NW        | F           | P            | 60.00                    | [91]            |
| 525 | <i>Jatropha malacophylla</i>    |         | Rosids                  | W         | T           | P            | 7.49                     | [29]            |
| 526 | <i>Jatropha standleyi</i>       |         | Rosids                  | W         | T           | P            | 25.18                    | [29, 83]        |
| 527 | <i>Juglans nigra</i>            |         | Rosids                  | W         | T           | P            | 7.85                     | [5]             |
| 528 | <i>Juncus gerardii</i>          |         | Monocots                | NW        | G           | P            | 0.72                     | [68]            |
| 529 | <i>Juncus mertensianus</i>      |         | Monocots                | NW        | G           | P            | 7.50                     | [10]            |
| 530 | <i>Juncus roemerianus</i>       |         | Monocots                | NW        | G           | P            | 1.41                     | [68]            |
| 531 | <i>Juniperus communis</i>       |         | Gymnosperms             | W         | T           | P            | 0.30                     | [1]             |
| 532 | <i>Kalmia latifolia</i>         |         | Asterids                | W         | S           | P            | 2.60                     | [5]             |
| 533 | <i>Kielmeyera coriacea</i>      |         | Rosids                  | W         | T           | P            | 4.63                     | [64]            |
| 534 | <i>Kielmeyera variabilis</i>    |         | Rosids                  | W         | S           | P            | 4.63                     | [64]            |
| 535 | <i>Knautia arvensis</i>         |         | Asterids                | NW        | F           | P            | 0.37                     | [31]            |
| 536 | <i>Lacmellea panamensis</i>     |         | Asterids                | W         | T           | P            | 14.45                    | [82]            |
| 537 | <i>Lactuca canadensis</i>       |         | Asterids                | NW        | F           | I            | 9.49                     | [39, 40]        |
| 538 | <i>Lactuca ludoviciana</i>      |         | Asterids                | NW        | F           | I            | 12.89                    | [49]            |
| 539 | <i>Lactuca serriola</i>         |         | Asterids                | NW        | F           | I            | 4.34                     | [39, 40, 49]    |
| 540 | <i>Lafoensia pacari</i>         |         | Rosids                  | W         | T           | P            | 9.08                     | [129]           |
| 541 | <i>Laguncularia racemosa</i>    |         | Rosids                  | W         | T           | P            | 0.39                     | [66]            |
| 542 | <i>Lantana camara</i>           |         | Asterids                | W         | V           | P            | 5.58                     | [62]            |
| 543 | <i>Larix americana</i>          |         | Gymnosperms             | W         | T           | P            | 6.52                     | [1]             |

|     | species                         | synonym                           | major taxonomic lineage | woodiness | growth form | life-history | mean percent leaf damage | sources of data |
|-----|---------------------------------|-----------------------------------|-------------------------|-----------|-------------|--------------|--------------------------|-----------------|
| 544 | <i>Larix laricina</i>           |                                   | Gymnosperms             | W         | T           | P            | 0.60                     | [130]           |
| 545 | <i>Lasiopetalum ferrugineum</i> |                                   | Rosids                  | W         | S           | P            | 50.50                    | [7]             |
| 546 | <i>Lathyrus latifolius</i>      |                                   | Rosids                  | NW        | V           | P            | 0.91                     | [5]             |
| 547 | <i>Lathyrus leucanthus</i>      |                                   | Rosids                  | NW        | F           | P            | 5.75                     | [53]            |
| 548 | <i>Lathyrus pratensis</i>       |                                   | Rosids                  | NW        | V           | P            | 2.69                     | [31]            |
| 549 | <i>Lathyrus venosus</i>         |                                   | Rosids                  | NW        | V           | P            | 1.60                     | [23]            |
| 550 | <i>Laurentia longiflora</i>     | <i>Hippobroma longiflora</i>      | Asterids                | NW        | F           | P            | 0.20                     | [62]            |
| 551 | <i>Lecythis poiteaui</i>        |                                   | Asterids                | W         | T           | P            | 0.60                     | [48]            |
| 552 | <i>Leonardoxa africana</i>      |                                   | Rosids                  | W         | T           | P            | 1.89                     | [131]           |
| 553 | <i>Leontodon autumnalis</i>     |                                   | Asterids                | NW        | F           | P            | 1.10                     | [31]            |
| 554 | <i>Lepidium campestre</i>       |                                   | Rosids                  | NW        | F           | A            | 28.25                    | [39, 40]        |
| 555 | <i>Lepidium densiflorum</i>     |                                   | Rosids                  | NW        | F           | A            | 32.92                    | [39, 40]        |
| 556 | <i>Leptaspis zeylanica</i>      |                                   | Monocots                | NW        | F           | P            | 4.20                     | [36]            |
| 557 | <i>Lespedeza capitata</i>       |                                   | Rosids                  | NW        | F           | P            | 8.91                     | [132]           |
| 558 | <i>Leucaena leucocephala</i>    |                                   | Rosids                  | W         | T           | P            | 2.10                     | [37]            |
| 559 | <i>Leucanthemum vulgare</i>     | <i>Chrysanthemum leucanthemum</i> | Asterids                | NW        | F           | P            | 1.15                     | [44]            |
| 560 | <i>Leucanthemum vulgare</i>     |                                   | Asterids                | NW        | F           | P            | 1.30                     | [31]            |
| 561 | <i>Leucopogon esquamatus</i>    |                                   | Asterids                | W         | S           | P            | 44.00                    | [7]             |
| 562 | <i>Leucopogon microphyllus</i>  |                                   | Asterids                | W         | S           | P            | 8.57                     | [7]             |
| 563 | <i>Licania hypoleuca</i>        |                                   | Rosids                  | W         | T           | P            | 4.55                     | [82]            |
| 564 | <i>Licania incana</i>           |                                   | Rosids                  | W         | T           | P            | 1.50                     | [48]            |
| 565 | <i>Licania membranacea</i>      |                                   | Rosids                  | W         | T           | P            | 10.50                    | [48]            |
| 566 | <i>Licania michauxii</i>        |                                   | Rosids                  | W         | S           | P            | 12.00                    | [63]            |



|     | species                           | synonym                 | major taxonomic lineage | woodiness | growth form | life-history | mean percent leaf damage | sources of data  |
|-----|-----------------------------------|-------------------------|-------------------------|-----------|-------------|--------------|--------------------------|------------------|
| 567 | <i>Ligustrum vulgare</i>          |                         | Asterids                | W         | S           | P            | 1.40                     | [104]            |
| 568 | <i>Linaria vulgaris</i>           |                         | Asterids                | NW        | F           | P            | 2.22                     | [10, 52]         |
| 569 | <i>Lindera benzoin</i>            |                         | Magnoliids              | W         | T           | P            | 10.40                    | [10]             |
| 570 | <i>Linum lewisii</i>              |                         | Rosids                  | NW        | S           | P            | 6.90                     | [10]             |
| 571 | <i>Lippia graveolens</i>          |                         | Asterids                | W         | S           | P            | 4.21                     | [29]             |
| 572 | <i>Liquidambar styraciflua</i>    |                         | Other Angiosperms       | W         | T           | P            | 2.18                     | [19, 20, 22, 25] |
| 573 | <i>Liriodendron tulipifera</i>    |                         | Magnoliids              | W         | T           | P            | 2.74                     | [5, 20, 24, 133] |
| 574 | <i>Lithocarpus glaber</i>         |                         | Rosids                  | W         | T           | P            | 11.78                    | [57, 58]         |
| 575 | <i>Livistona australis</i>        |                         | Monocots                | W         | T           | P            | 10.00                    | [65]             |
| 576 | <i>Lobelia cardinalis</i>         |                         | Asterids                | NW        | F           | P            | 0.76                     | [5]              |
| 577 | <i>Lolium multiflorum</i>         |                         | Monocots                | NW        | G           | A            | 0.08                     | [5]              |
| 578 | <i>Lonchocarpus eriocarinalis</i> |                         | Rosids                  | W         | T           | P            | 6.34                     | [29, 83]         |
| 579 | <i>Lonchocarpus guatemalensis</i> |                         | Rosids                  | W         | T           | P            | 3.21                     | [4]              |
| 580 | <i>Lonchocarpus spp.</i>          |                         | Rosids                  | W         | S           | P            | 11.27                    | [29]             |
| 581 | <i>Lonicera involucrata</i>       |                         | Asterids                | W         | S           | P            | 2.90                     | [10]             |
| 582 | <i>Lonicera japonica</i>          |                         | Asterids                | W         | V           | P            | 8.00                     | [11]             |
| 583 | <i>Lonicera morrowi</i>           |                         | Asterids                | W         | S           | P            | 3.10                     | [10]             |
| 584 | <i>Lonicera xylosteum</i>         |                         | Asterids                | W         | S           | P            | 1.62                     | [104]            |
| 585 | <i>Lophopetalum spp.</i>          |                         | Rosids                  | W         | T           | P            | 5.83                     | [51]             |
| 586 | <i>Lorinseria areolata</i>        | <i>Wwardia areolata</i> | Ferns                   | NW        | F           | P            | 1.70                     | [5]              |
| 587 | <i>Loropetalum chinense</i>       |                         | Other Angiosperms       | W         | S           | P            | 5.37                     | [57, 58]         |
| 588 | <i>Lotus corniculatus</i>         |                         | Rosids                  | NW        | F           | P            | 1.38                     | [31]             |
| 589 | <i>Luehea seemanii</i>            |                         | Rosids                  | W         | T           | P            | 26.88                    | [8, 61]          |
| 590 | <i>Lumnitzera littorea</i>        |                         | Rosids                  | W         | T           | P            | 4.30                     | [9]              |

|     | species                          | synonym                  | major taxonomic lineage | woodiness | growth form | life-history | mean percent leaf damage | sources of data |
|-----|----------------------------------|--------------------------|-------------------------|-----------|-------------|--------------|--------------------------|-----------------|
| 591 | <i>Lumnitzera racemosa</i>       |                          | Rosids                  | W         | T           | P            | 5.60                     | [9, 34]         |
| 592 | <i>Lupinus argenteus</i>         |                          | Rosids                  | NW        | F           | P            | 5.87                     | [10, 53]        |
| 593 | <i>Lupinus nanus</i>             |                          | Rosids                  | W         | S           | A            | 19.69                    | [134]           |
| 594 | <i>Luzula campestris</i>         |                          | Monocots                | NW        | G           | P            | 1.21                     | [31]            |
| 595 | <i>Lycaste aromatica</i>         |                          | Monocots                | NW        | F           | P            | 40.00                    | [91]            |
| 596 | <i>Lythrum salicaria</i>         |                          | Rosids                  | NW        | S           | P            | 10.00                    | [10]            |
| 597 | <i>Mabea angularis</i>           |                          | Rosids                  | W         | T           | P            | 1.30                     | [48]            |
| 598 | <i>Mabea sessiliflorum</i>       |                          | Rosids                  | W         | T           | P            | 12.94                    | [110]           |
| 599 | <i>Mabea sp.</i>                 |                          | Rosids                  | W         | T           | P            | 6.18                     | [110]           |
| 600 | <i>Macaranga confera</i>         |                          | Rosids                  | W         | T           | P            | 5.29                     | [135]           |
| 601 | <i>Macaranga gigantea</i>        |                          | Rosids                  | W         | T           | P            | 5.17                     | [135]           |
| 602 | <i>Macaranga hosei</i>           |                          | Rosids                  | W         | T           | P            | 5.83                     | [135]           |
| 603 | <i>Macaranga hulletti</i>        |                          | Rosids                  | W         | T           | P            | 3.34                     | [135]           |
| 604 | <i>Macaranga hypoleuca</i>       |                          | Rosids                  | W         | T           | P            | 5.86                     | [135]           |
| 605 | <i>Macaranga tanarius</i>        |                          | Rosids                  | W         | T           | P            | 5.18                     | [135]           |
| 606 | <i>Macaranga tribola</i>         |                          | Rosids                  | W         | T           | P            | 12.18                    | [135]           |
| 607 | <i>Machaerium microphyllum</i>   |                          | Rosids                  | W         | V           | P            | 32.65                    | [82]            |
| 608 | <i>Machilus thunbergii</i>       | <i>Persea thunbergii</i> | Magnoliids              | W         | T           | P            | 6.11                     | [57, 58]        |
| 609 | <i>Maclura tinctoria</i>         |                          | Rosids                  | W         | T           | P            | 13.23                    | [29]            |
| 610 | <i>Macrolobium angustifolium</i> |                          | Rosids                  | W         | T           | P            | 24.86                    | [110]           |
| 611 | <i>Macrolobium limbatum</i>      |                          | Rosids                  | W         | T           | P            | 10.68                    | [110]           |
| 612 | <i>Macrolobium sp.</i>           |                          | Rosids                  | W         | T           | P            | 2.63                     | [110]           |
| 613 | <i>Maesopsis eminii</i>          |                          | Rosids                  | W         | T           | P            | 1.16                     | [12]            |
| 614 | <i>Maianthemum stellatum</i>     |                          | Monocots                | NW        | F           | P            | 1.40                     | [10]            |

|     | species                          | synonym                                                     | major taxonomic lineage | woodiness | growth form | life-history | mean percent leaf damage | sources of data |
|-----|----------------------------------|-------------------------------------------------------------|-------------------------|-----------|-------------|--------------|--------------------------|-----------------|
| 615 | <i>Maieta guianensis</i>         |                                                             | Rosids                  | W         | T           | P            | 5.05                     | [136]           |
| 616 | <i>Manihot glaziovii</i>         |                                                             | Rosids                  | W         | T           | P            | 4.08                     | [12]            |
| 617 | <i>Manihot spp.</i>              |                                                             | Rosids                  | W         | T           | P            | 5.53                     | [64]            |
| 618 | <i>Manilkara bidentata</i>       |                                                             | Asterids                | W         | T           | P            | 2.40                     | [82, 89]        |
| 619 | <i>Maprounea guianensis</i>      |                                                             | Rosids                  | W         | S           | P            | 3.98                     | [64]            |
| 620 | <i>Marantochloa leucantha</i>    |                                                             | Monocots                | W         | S           | P            | 0.29                     | [36]            |
| 621 | <i>Marattia laxa</i>             |                                                             | Ferns                   | NW        | F           | P            | 14.81                    | [74]            |
| 622 | <i>Markhamia platycalyx</i>      |                                                             | Asterids                | W         | T           | P            | 9.00                     | [94]            |
| 623 | <i>Medicago lupulina</i>         |                                                             | Rosids                  | NW        | F           | I            | 3.98                     | [31]            |
| 624 | <i>Medicago varia</i>            | <i>Bonte luzerne,</i><br><i>Medicago x.</i><br><i>varia</i> | Rosids                  | NW        | F           | P            | 3.71                     | [31]            |
| 625 | <i>Melilotus officinalis</i>     |                                                             | Rosids                  | NW        | F           | I            | 9.85                     | [49]            |
| 626 | <i>Melinis repens</i>            |                                                             | Monocots                | NW        | G           | I            | 0.85                     | [37]            |
| 627 | <i>Meliosma oldhamii</i>         |                                                             | Other Angiosperms       | W         | T           | P            | 2.63                     | [58]            |
| 628 | <i>Mertensia ciliata</i>         |                                                             | Asterids                | NW        | F           | P            | 3.90                     | [10]            |
| 629 | <i>Mertensia paniculata</i>      |                                                             | Asterids                | NW        | S           | P            | 5.97                     | [30]            |
| 630 | <i>Metrosideros polymorpha</i>   |                                                             | Rosids                  | W         | T           | P            | 6.61                     | [37]            |
| 631 | <i>Miconia argentea</i>          |                                                             | Rosids                  | W         | T           | P            | 43.45                    | [8]             |
| 632 | <i>Microlaena stipoides</i>      | <i>Ehrharta stipoides</i>                                   | Monocots                | NW        | G           | P            | 0.16                     | [37]            |
| 633 | <i>Micropholis brochidodroma</i> |                                                             | Asterids                | W         | T           | P            | 8.20                     | [48]            |
| 634 | <i>Micropholis cayennensis</i>   |                                                             | Asterids                | W         | T           | P            | 0.60                     | [48]            |
| 635 | <i>Micropholis egensis</i>       |                                                             | Asterids                | W         | T           | P            | 6.30                     | [48]            |
| 636 | <i>Micropholis guyanensis</i>    |                                                             | Asterids                | W         | T           | P            | 8.17                     | [48]            |

|     | species                        | synonym             | major taxonomic lineage | woodiness | growth form | life-history | mean percent leaf damage | sources of data |
|-----|--------------------------------|---------------------|-------------------------|-----------|-------------|--------------|--------------------------|-----------------|
| 637 | <i>Micropholis trunciflora</i> |                     | Asterids                | W         | T           | P            | 4.60                     | [48]            |
| 638 | <i>Micropholis venulosa</i>    |                     | Asterids                | W         | T           | P            | 14.82                    | [99]            |
| 639 | <i>Microstegium vimineum</i>   |                     | Monocots                | NW        | G           | A            | 2.50                     | [11]            |
| 640 | <i>Mikania leiostachya</i>     |                     | Asterids                | W         | V           | P            | 1.33                     | [61]            |
| 641 | <i>Mimosa pudica</i>           |                     | Rosids                  | NW        | F           | I            | 2.27                     | [62]            |
| 642 | <i>Mimulus ringens</i>         |                     | Asterids                | NW        | F           | P            | 1.55                     | [5]             |
| 643 | <i>Mimusops bagshawei</i>      |                     | Asterids                | W         | T           | P            | 5.00                     | [94]            |
| 644 | <i>Mischocarpus spp.</i>       |                     | Rosids                  | W         | T           | P            | 4.00                     | [32]            |
| 645 | <i>Mitragyna inermis</i>       |                     | Asterids                | W         | T           | P            | 2.30                     | [81]            |
| 646 | <i>Molineria latifolia</i>     |                     | Monocots                | NW        | F           | P            | 1.50                     | [36]            |
| 647 | <i>Monarda fistulosa</i>       |                     | Asterids                | NW        | F           | P            | 2.88                     | [23]            |
| 648 | <i>Monotes kerstingii</i>      |                     | Rosids                  | W         | T           | P            | 4.50                     | [81]            |
| 649 | <i>Morella rubra</i>           | <i>Myrica rubra</i> | Rosids                  | W         | T           | P            | 3.27                     | [58]            |
| 650 | <i>Mouriri myrtilloides</i>    |                     | Rosids                  | W         | S           | P            | 17.53                    | [8]             |
| 651 | <i>Musa paradisiaca</i>        |                     | Monocots                | W         | T           | P            | 8.10                     | [88]            |
| 652 | <i>Myroxylon peruiferum</i>    |                     | Rosids                  | W         | T           | P            | 11.33                    | [12]            |
| 653 | <i>Nectandra ambigens</i>      |                     | Magnoliids              | W         | T           | P            | 12.90                    | [4, 137]        |
| 654 | <i>Neoboutonia macrocalyx</i>  |                     | Rosids                  | W         | T           | P            | 6.00                     | [94]            |
| 655 | <i>Neolitsea aurata</i>        |                     | Magnoliids              | W         | T           | P            | 6.53                     | [57, 58]        |
| 656 | <i>Nephrolepis cordifolia</i>  |                     | Ferns                   | NW        | F           | P            | 0.16                     | [37]            |
| 657 | <i>Nephrolepis multiflora</i>  |                     | Ferns                   | NW        | F           | P            | 0.09                     | [37]            |
| 658 | <i>Nestegis sandwicensis</i>   |                     | Asterids                | W         | T           | P            | 5.77                     | [37]            |
| 659 | <i>Nicotiana glauca</i>        |                     | Asterids                | W         | T           | P            | 0.48                     | [37]            |
| 660 | <i>Nothoecstrum brevifolia</i> |                     | Asterids                | W         | T           | P            | 1.11                     | [37]            |

|     | species                           | synonym              | major taxonomic lineage | woodiness | growth form | life-history | mean percent leaf damage | sources of data |
|-----|-----------------------------------|----------------------|-------------------------|-----------|-------------|--------------|--------------------------|-----------------|
| 661 | <i>Nothofagus moorei</i>          |                      | Rosids                  | W         | T           | P            | 33.85                    | [65]            |
| 662 | <i>Nothofagus pumilio</i>         |                      | Rosids                  | W         | T           | P            | 8.61                     | [138, 139]      |
| 663 | <i>Nuphar lutea</i>               | <i>Nuphar luteum</i> | Other Angiosperms       | NW        | F           | P            | 17.40                    | [140]           |
| 664 | <i>Nuphar variegatum</i>          |                      | Other Angiosperms       | NW        | F           | P            | 6.03                     | [1]             |
| 665 | <i>Nymphaea odorata</i>           |                      | Other Angiosperms       | NW        | F           | P            | 9.77                     | [1]             |
| 666 | <i>Oenothera biennis</i>          |                      | Rosids                  | NW        | F           | I            | 6.87                     | [5]             |
| 667 | <i>Oenothera humifusa</i>         |                      | Rosids                  | NW        | F           | P            | 0.46                     | [5]             |
| 668 | <i>Oenothera laciniata</i>        |                      | Rosids                  | NW        | F           | A            | 1.10                     | [5]             |
| 669 | <i>Olea europaea</i>              |                      | Asterids                | W         | T           | P            | 0.20                     | [37]            |
| 670 | <i>Olea welwitschii</i>           |                      | Asterids                | W         | T           | P            | 7.00                     | [94]            |
| 671 | <i>Omphalea oleifera</i>          |                      | Rosids                  | W         | T           | P            | 19.80                    | [4]             |
| 672 | <i>Onobrychis viciifolia</i>      |                      | Rosids                  | NW        | F           | P            | 0.78                     | [31]            |
| 673 | <i>Oreocallis sp.</i>             |                      | Other Angiosperms       | W         | T           | P            | 2.70                     | [65]            |
| 674 | <i>Ormosia macrocalyx</i>         |                      | Rosids                  | W         | T           | P            | 9.85                     | [82]            |
| 675 | <i>Orthion ob lanceolatum</i>     |                      | Rosids                  | W         | T           | P            | 6.42                     | [4]             |
| 676 | <i>Osbornia octodonta</i>         |                      | Rosids                  | W         | T           | P            | 6.05                     | [9, 34]         |
| 677 | <i>Osmunda claytoniana</i>        |                      | Ferns                   | NW        | F           | P            | 1.30                     | [1]             |
| 678 | <i>Osteomeles anthyllidifolia</i> |                      | Rosids                  | W         | S           | P            | 0.39                     | [37]            |
| 679 | <i>Otoba glycyarpa</i>            |                      | Magnoliids              | W         | T           | P            | 3.30                     | [48]            |
| 680 | <i>Oxandra asbeckii</i>           |                      | Magnoliids              | W         | T           | P            | 7.60                     | [48]            |
| 681 | <i>Oxandra panamensis</i>         |                      | Magnoliids              | W         | T           | P            | 1.20                     | [82]            |
| 682 | <i>Pachira aquatica</i>           |                      | Rosids                  | W         | T           | P            | 22.30                    | [48]            |
| 683 | <i>Pachira brevipes</i>           |                      | Rosids                  | W         | T           | P            | 14.24                    | [48, 110]       |
| 684 | <i>Pachira flaviflora</i>         |                      | Rosids                  | W         | T           | P            | 8.00                     | [48]            |
| 685 | <i>Pachira insignis</i>           |                      | Rosids                  | W         | T           | P            | 10.60                    | [48]            |

|     | species                        | synonym | major taxonomic lineage | woodiness | growth form | life-history | mean percent leaf damage | sources of data |
|-----|--------------------------------|---------|-------------------------|-----------|-------------|--------------|--------------------------|-----------------|
| 686 | <i>Pachira quinata</i>         |         | Rosids                  | W         | T           | P            | 1.49                     | [47]            |
| 687 | <i>Palicourea rigida</i>       |         | Asterids                | W         | T           | P            | 5.04                     | [64]            |
| 688 | <i>Palisota mannii</i>         |         | Monocots                | NW        | F           | P            | 3.70                     | [36]            |
| 689 | <i>Pandorea pandorana</i>      |         | Asterids                | W         | V           | P            | 55.32                    | [7]             |
| 690 | <i>Panicum capillare</i>       |         | Monocots                | NW        | F           | A            | 1.20                     | [44]            |
| 691 | <i>Panicum lanuginosum</i>     |         | Monocots                | NW        | G           | A            | 2.70                     | [44]            |
| 692 | <i>Parashorea malaanonan</i>   |         | Rosids                  | W         | T           | P            | 3.55                     | [109]           |
| 693 | <i>Parashorea spp.</i>         |         | Rosids                  | W         | T           | P            | 6.06                     | [107]           |
| 694 | <i>Parashorea tomentella</i>   |         | Rosids                  | W         | T           | P            | 12.11                    | [126]           |
| 695 | <i>Parinari excelsa</i>        |         | Rosids                  | W         | T           | P            | 3.00                     | [94]            |
| 696 | <i>Paspalum urvillei</i>       |         | Monocots                | NW        | G           | P            | 0.03                     | [37]            |
| 697 | <i>Pastinaca sativa</i>        |         | Asterids                | NW        | F           | I            | 0.45                     | [31]            |
| 698 | <i>Paullinia cururu</i>        |         | Rosids                  | W         | T           | P            | 15.30                    | [29]            |
| 699 | <i>Paullinia sessiliflora</i>  |         | Rosids                  | W         | T           | P            | 12.50                    | [29]            |
| 700 | <i>Paullinia spp.</i>          |         | Rosids                  | W         | V           | P            | 10.44                    | [4]             |
| 701 | <i>Pavonia rosa-campestris</i> |         | Rosids                  | W         | S           | P            | 10.24                    | [64]            |
| 702 | <i>Paxistima myrsinites</i>    |         | Rosids                  | W         | S           | P            | 0.20                     | [10]            |
| 703 | <i>Peixotoa goiana</i>         |         | Rosids                  | W         | S           | P            | 5.04                     | [64]            |
| 704 | <i>Peritassa pruinosa</i>      |         | Rosids                  | W         | V           | P            | 8.50                     | [82]            |
| 705 | <i>Persea americana</i>        |         | Magnoliids              | W         | T           | P            | 26.00                    | [141]           |
| 706 | <i>Pharus latifolius</i>       |         | Monocots                | NW        | G           | P            | 6.10                     | [36]            |
| 707 | <i>Phaseolus vulgaris</i>      |         | Rosids                  | NW        | V           | A            | 1.70                     | [88]            |
| 708 | <i>Phegopteris connectilis</i> |         | Ferns                   | NW        | F           | P            | 11.55                    | [1]             |
| 709 | <i>Phegopteris dryopteris</i>  |         | Ferns                   | NW        | F           | P            | 1.97                     | [1]             |
| 710 | <i>Philothea salsolifolia</i>  |         | Rosids                  | W         | S           | P            | 0.48                     | [7]             |

|     | species                        | synonym                    | major taxonomic lineage | woodiness | growth form | life-history | mean percent leaf damage | sources of data |
|-----|--------------------------------|----------------------------|-------------------------|-----------|-------------|--------------|--------------------------|-----------------|
| 711 | <i>Phleum pratense</i>         |                            | Monocots                | NW        | G           | P            | 0.88                     | [10, 31]        |
| 712 | <i>Phlox drummondii</i>        |                            | Asterids                | NW        | F           | A            | 0.07                     | [5]             |
| 713 | <i>Phoebe cinnamomifolia</i>   |                            | Magnoliids              | W         | T           | P            | 8.73                     | [61]            |
| 714 | <i>Phragmites australis</i>    |                            | Monocots                | NW        | G           | P            | 1.90                     | [10]            |
| 715 | <i>Phryganocydia corymbosa</i> |                            | Asterids                | W         | V           | P            | 1.24                     | [61]            |
| 716 | <i>Phyllanthus choristylus</i> |                            | Rosids                  | NW        | F           | P            | 6.00                     | [32]            |
| 717 | <i>Phytolacca americana</i>    |                            | Other Angiosperms       | NW        | F           | P            | 1.50                     | [10]            |
| 718 | <i>Phytolacca rivinoides</i>   |                            | Other Angiosperms       | NW        | F           | P            | 10.70                    | [88]            |
| 719 | <i>Picea abies</i>             |                            | Gymnosperms             | W         | T           | P            | 0.06                     | [130]           |
| 720 | <i>Picea glauca</i>            |                            | Gymnosperms             | W         | T           | P            | 2.03                     | [1]             |
| 721 | <i>Picea mariana</i>           |                            | Gymnosperms             | W         | T           | P            | 0.00                     | [1]             |
| 722 | <i>Picea rubens</i>            |                            | Gymnosperms             | W         | T           | P            | 0.00                     | [5]             |
| 723 | <i>Piliostigma thonningii</i>  | <i>Bauhinia thonningii</i> | Rosids                  | W         | T           | P            | 8.70                     | [81]            |
| 724 | <i>Pimelea linifolia</i>       |                            | Rosids                  | W         | S           | P            | 2.43                     | [7]             |
| 725 | <i>Pimenta racemosa</i>        |                            | Rosids                  | W         | T           | P            | 0.93                     | [12]            |
| 726 | <i>Pimpinella saxifraga</i>    | <i>Pimpinella major</i>    | Asterids                | NW        | F           | P            | 0.19                     | [31]            |
| 727 | <i>Pinguicula moranensis</i>   |                            | Asterids                | NW        | F           | P            | 1.61                     | [142]           |
| 728 | <i>Pinus banksiana</i>         |                            | Gymnosperms             | W         | T           | P            | 0.60                     | [1]             |
| 729 | <i>Pinus resinosa</i>          |                            | Gymnosperms             | W         | T           | P            | 4.27                     | [1]             |
| 730 | <i>Pinus strobus</i>           |                            | Gymnosperms             | W         | T           | P            | 0.28                     | [130]           |
| 731 | <i>Piper aduncum</i>           |                            | Magnoliids              | W         | T           | P            | 4.63                     | [12]            |
| 732 | <i>Piper arieianum</i>         |                            | Magnoliids              | W         | S           | P            | 13.55                    | [143]           |
| 733 | <i>Piper cenocladum</i>        |                            | Magnoliids              | W         | S           | P            | 18.53                    | [144]           |
| 734 | <i>Piper reticulatum</i>       |                            | Magnoliids              | W         | S           | P            | 25.30                    | [82]            |

|     | species                           | synonym | major taxonomic lineage | woodiness | growth form | life-history | mean percent leaf damage | sources of data  |
|-----|-----------------------------------|---------|-------------------------|-----------|-------------|--------------|--------------------------|------------------|
| 735 | <i>Piper stipulaceum</i>          |         | Magnoliids              | W         | S           | P            | 12.27                    | [84]             |
| 736 | <i>Pithecellobium dulce</i>       |         | Rosids                  | W         | T           | P            | 4.57                     | [85]             |
| 737 | <i>Plantago hawaiiensis</i>       |         | Asterids                | NW        | F           | P            | 0.95                     | [37]             |
| 738 | <i>Plantago lanceolata</i>        |         | Asterids                | NW        | F           | I            | 2.83                     | [31, 37, 41]     |
| 739 | <i>Plantago major</i>             |         | Asterids                | NW        | F           | P            | 20.19                    | [10, 39, 40, 44] |
| 740 | <i>Plantago media</i>             |         | Asterids                | NW        | F           | P            | 0.52                     | [31]             |
| 741 | <i>Plantago rugellii</i>          |         | Asterids                | NW        | F           | A            | 20.47                    | [39, 40]         |
| 742 | <i>Platanus occidentalis</i>      |         | Other Angiosperms       | W         | T           | P            | 3.20                     | [25]             |
| 743 | <i>Pleiostachya pruinosa</i>      |         | Monocots                | NW        | F           | P            | 0.76                     | [36]             |
| 744 | <i>Pleopeltis crassinervata</i>   |         | Ferns                   | NW        | F           | P            | 11.61                    | [91, 145]        |
| 745 | <i>Pleopeltis plebeium</i>        |         | Ferns                   | NW        | F           | P            | 16.97                    | [91]             |
| 746 | <i>Pleopeltis polypodioides</i>   |         | Ferns                   | NW        | V           | P            | 8.07                     | [91]             |
| 747 | <i>Pleopeltis rhodopleuron</i>    |         | Ferns                   | NW        | F           | P            | 7.71                     | [91]             |
| 748 | <i>Pleuranthodium racemigerum</i> |         | Monocots                | NW        | F           | P            | 0.50                     | [36]             |
| 749 | <i>Plumeria rubra</i>             |         | Asterids                | W         | T           | P            | 6.68                     | [83]             |
| 750 | <i>Poa pratensis</i>              |         | Monocots                | NW        | G           | P            | 2.53                     | [31, 52]         |
| 751 | <i>Poa trivialis</i>              |         | Monocots                | NW        | G           | P            | 1.97                     | [31]             |
| 752 | <i>Polemonium foliosissimum</i>   |         | Asterids                | NW        | F           | P            | 3.60                     | [10]             |
| 753 | <i>Pollia condensata</i>          |         | Monocots                | NW        | F           | P            | 14.50                    | [36]             |
| 754 | <i>Polybotrya cervina</i>         |         | Ferns                   | NW        | F           | P            | 9.90                     | [33]             |
| 755 | <i>Polygonum cuspidatum</i>       |         | Other Angiosperms       | NW        | S           | P            | 6.60                     | [10]             |
| 756 | <i>Polygonum viviparum</i>        |         | Other Angiosperms       | NW        | F           | P            | 0.97                     | [30]             |
| 757 | <i>Polyosma</i>                   |         | Asterids                | W         | T           | P            | 15.60                    | [65]             |



|     | species                           | synonym | major taxonomic lineage | woodiness | growth form | life-history | mean percent leaf damage | sources of data  |
|-----|-----------------------------------|---------|-------------------------|-----------|-------------|--------------|--------------------------|------------------|
|     | <i>cunninghamii</i>               |         |                         |           |             |              |                          |                  |
| 758 | <i>Polypodium furfuraceum</i>     |         | Ferns                   | NW        | F           | P            | 8.52                     | [91, 145]        |
| 759 | <i>Polypodium plebeium</i>        |         | Ferns                   | NW        | F           | P            | 21.60                    | [145]            |
| 760 | <i>Polypodium polypodioides</i>   |         | Ferns                   | NW        | F           | P            | 12.56                    | [145]            |
| 761 | <i>Polypodium rhodopleuron</i>    |         | Ferns                   | NW        | F           | P            | 9.50                     | [145]            |
| 762 | <i>Polypodium virginianum</i>     |         | Ferns                   | NW        | F           | P            | 0.74                     | [1]              |
| 763 | <i>Polyscias fulva</i>            |         | Asterids                | W         | T           | P            | 5.00                     | [94]             |
| 764 | <i>Polyscias murrayi</i>          |         | Asterids                | W         | T           | P            | 8.60                     | [65]             |
| 765 | <i>Polystichum acrostichoides</i> |         | Ferns                   | NW        | F           | P            | 2.31                     | [5]              |
| 766 | <i>Polystichum muricatum</i>      |         | Ferns                   | NW        | F           | P            | 16.00                    | [70]             |
| 767 | <i>Pomaderris ferruginea</i>      |         | Rosids                  | W         | S           | P            | 45.78                    | [7]              |
| 768 | <i>Pomaderris lanigera</i>        |         | Rosids                  | W         | S           | P            | 12.00                    | [7]              |
| 769 | <i>Pontederia cordata</i>         |         | Monocots                | NW        | F           | P            | 1.88                     | [130]            |
| 770 | <i>Populus deltoides</i>          |         | Rosids                  | W         | T           | P            | 5.80                     | [10]             |
| 771 | <i>Populus tremuloides</i>        |         | Rosids                  | W         | T           | P            | 7.44                     | [10, 23, 146]    |
| 772 | <i>Posidonia oceanica</i>         |         | Monocots                | NW        | F           | P            | 1.74                     | [147]            |
| 773 | <i>Potentilla arguta</i>          |         | Rosids                  | NW        | S           | P            | 3.43                     | [39, 40]         |
| 774 | <i>Potentilla recta</i>           |         | Rosids                  | NW        | F           | P            | 10.12                    | [23, 39, 40, 52] |
| 775 | <i>Pothos longipes</i>            |         | Monocots                | NW        | V           | P            | 3.30                     | [36]             |
| 776 | <i>Poulsenia armata</i>           |         | Rosids                  | W         | T           | P            | 1.78                     | [4]              |
| 777 | <i>Pouteria caimito</i>           |         | Asterids                | W         | T           | P            | 28.01                    | [99]             |
| 778 | <i>Pouteria cuspidata</i>         |         | Asterids                | W         | T           | P            | 17.70                    | [48]             |
| 779 | <i>Pouteria firma</i>             |         | Asterids                | W         | T           | P            | 4.10                     | [32]             |

|     | species                         | synonym | major taxonomic lineage | woodiness | growth form | life-history | mean percent leaf damage | sources of data |
|-----|---------------------------------|---------|-------------------------|-----------|-------------|--------------|--------------------------|-----------------|
| 780 | <i>Pouteria peruviansis</i>     |         | Asterids                | W         | T           | P            | 7.86                     | [99]            |
| 781 | <i>Pouteria reticulata</i>      |         | Asterids                | W         | T           | P            | 2.90                     | [82]            |
| 782 | <i>Pouteria stipitata</i>       |         | Asterids                | W         | T           | P            | 14.99                    | [8]             |
| 783 | <i>Premna angolensis</i>        |         | Asterids                | W         | T           | P            | 8.00                     | [94]            |
| 784 | <i>Primula farinosa</i>         |         | Asterids                | NW        | F           | P            | 8.12                     | [148]           |
| 785 | <i>Primula veris</i>            |         | Asterids                | NW        | F           | P            | 0.37                     | [31]            |
| 786 | <i>Prosopis pallida</i>         |         | Rosids                  | W         | T           | P            | 1.31                     | [37]            |
| 787 | <i>Prosopis spp.</i>            |         | Rosids                  | W         | S           | P            | 13.90                    | [29]            |
| 788 | <i>Prostanthera denticulata</i> |         | Asterids                | W         | S           | P            | 49.30                    | [7]             |
| 789 | <i>Protium aracouchini</i>      |         | Rosids                  | W         | T           | P            | 4.95                     | [48]            |
| 790 | <i>Protium calanense</i>        |         | Rosids                  | W         | T           | P            | 64.18                    | [110]           |
| 791 | <i>Protium decandrum</i>        |         | Rosids                  | W         | T           | P            | 19.00                    | [48]            |
| 792 | <i>Protium gallosum</i>         |         | Rosids                  | W         | T           | P            | 20.19                    | [110]           |
| 793 | <i>Protium giganteum</i>        |         | Rosids                  | W         | T           | P            | 7.30                     | [48]            |
| 794 | <i>Protium hebetatum</i>        |         | Rosids                  | W         | T           | P            | 4.63                     | [48, 125]       |
| 795 | <i>Protium heptaphyllum</i>     |         | Rosids                  | W         | T           | P            | 13.49                    | [110]           |
| 796 | <i>Protium krukoffii</i>        |         | Rosids                  | W         | T           | P            | 61.06                    | [110]           |
| 797 | <i>Protium laxiflorum</i>       |         | Rosids                  | W         | T           | P            | 34.50                    | [48]            |
| 798 | <i>Protium nodulosum</i>        |         | Rosids                  | W         | T           | P            | 15.26                    | [110]           |
| 799 | <i>Protium opacum</i>           |         | Rosids                  | W         | T           | P            | 19.19                    | [48, 110]       |
| 800 | <i>Protium pallidum</i>         |         | Rosids                  | W         | T           | P            | 8.10                     | [48]            |
| 801 | <i>Protium paniculatum</i>      |         | Rosids                  | W         | T           | P            | 28.35                    | [110]           |
| 802 | <i>Protium sagotianum</i>       |         | Rosids                  | W         | T           | P            | 20.57                    | [48, 110]       |
| 803 | <i>Protium spruceanum</i>       |         | Rosids                  | W         | T           | P            | 17.11                    | [110]           |
| 804 | <i>Protium subserratum</i>      |         | Rosids                  | W         | T           | P            | 6.63                     | [48, 110]       |
| 805 | <i>Protium tenuifolium</i>      |         | Rosids                  | W         | T           | P            | 10.65                    | [8, 82]         |

|     | species                               | synonym                                             | major taxonomic lineage | woodiness | growth form | life-history | mean percent leaf damage | sources of data |
|-----|---------------------------------------|-----------------------------------------------------|-------------------------|-----------|-------------|--------------|--------------------------|-----------------|
| 806 | <i>Protium trifoliolatum</i>          |                                                     | Rosids                  | W         | T           | P            | 52.06                    | [110]           |
| 807 | <i>Prunella vulgaris</i>              |                                                     | Asterids                | NW        | F           | P            | 2.05                     | [31]            |
| 808 | <i>Prunus africana</i>                |                                                     | Rosids                  | W         | T           | P            | 8.00                     | [94]            |
| 809 | <i>Prunus pullei</i>                  |                                                     | Rosids                  | W         | T           | P            | 7.60                     | [32]            |
| 810 | <i>Prunus serotina</i>                |                                                     | Rosids                  | W         | T           | P            | 3.71                     | [20, 26]        |
| 811 | <i>Prunus spinosa</i>                 |                                                     | Rosids                  | W         | S           | P            | 18.46                    | [104]           |
| 812 | <i>Prunus virginiana</i>              |                                                     | Rosids                  | W         | T           | P            | 8.80                     | [26]            |
| 813 | <i>Pseudognaphalium sandwicensium</i> |                                                     | Asterids                | NW        | F           | P            | 0.41                     | [37]            |
| 814 | <i>Pseudolmedia oxyphyllaria</i>      |                                                     | Rosids                  | W         | T           | P            | 7.10                     | [4]             |
| 815 | <i>Pseudotsuga menziesii</i>          |                                                     | Gymnosperms             | W         | T           | P            | 1.20                     | [2, 3]          |
| 816 | <i>Psidium cattleianum</i>            |                                                     | Rosids                  | W         | T           | P            | 3.25                     | [12, 37]        |
| 817 | <i>Psidium guajava</i>                |                                                     | Rosids                  | W         | T           | P            | 3.23                     | [12]            |
| 818 | <i>Psidium sartorianum</i>            |                                                     | Rosids                  | W         | T           | P            | 2.94                     | [83]            |
| 819 | <i>Psiguria umbrosa</i>               | <i>Anguria umbrosa;</i><br><i>Citrullus umbrosa</i> | Rosids                  | W         | V           | P            | 0.67                     | [62]            |
| 820 | <i>Psoralea tenuiflora</i>            |                                                     | Rosids                  | NW        | F           | P            | 11.42                    | [49]            |
| 821 | <i>Psychotria acuminata</i>           |                                                     | Asterids                | W         | T           | P            | 3.51                     | [8]             |
| 822 | <i>Psychotria faxlucens</i>           |                                                     | Asterids                | W         | T           | P            | 3.76                     | [4]             |
| 823 | <i>Psychotria furcata</i>             |                                                     | Asterids                | W         | S           | P            | 15.51                    | [8]             |
| 824 | <i>Psychotria glomerulata</i>         |                                                     | Asterids                | W         | S           | P            | 7.10                     | [82]            |
| 825 | <i>Psychotria horizontalis</i>        |                                                     | Asterids                | W         | S           | P            | 26.47                    | [8]             |
| 826 | <i>Psychotria marginata</i>           |                                                     | Asterids                | W         | S           | P            | 18.06                    | [8]             |
| 827 | <i>Psychotria simiarum</i>            |                                                     | Asterids                | W         | T           | P            | 0.97                     | [4]             |

|     | species                        | synonym                                                               | major taxonomic lineage | woodiness | growth form | life-history | mean percent leaf damage | sources of data       |
|-----|--------------------------------|-----------------------------------------------------------------------|-------------------------|-----------|-------------|--------------|--------------------------|-----------------------|
| 828 | <i>Pterocarpus rohrii</i>      |                                                                       | Rosids                  | W         | T           | P            | 29.40                    | [4, 82]               |
| 829 | <i>Pultenaea daphnoides</i>    |                                                                       | Rosids                  | W         | S           | P            | 11.84                    | [7]                   |
| 830 | <i>Pultenaea elliptica</i>     |                                                                       | Rosids                  | W         | S           | P            | 15.60                    | [7]                   |
| 831 | <i>Pultenaea flexillis</i>     |                                                                       | Rosids                  | W         | S           | P            | 24.42                    | [7]                   |
| 832 | <i>Pyracantha angustifolia</i> |                                                                       | Rosids                  | W         | S           | P            | 0.57                     | [37]                  |
| 833 | <i>Qualea grandiflora</i>      |                                                                       | Rosids                  | W         | T           | P            | 7.15                     | [64]                  |
| 834 | <i>Qualea parviflora</i>       |                                                                       | Rosids                  | W         | T           | P            | 9.24                     | [64, 149]             |
| 835 | <i>Quercus alba</i>            |                                                                       | Rosids                  | W         | T           | P            | 10.79                    | [20, 22, 26, 150-152] |
| 836 | <i>Quercus ellipsoidalis</i>   |                                                                       | Rosids                  | W         | T           | P            | 8.04                     | [23]                  |
| 837 | <i>Quercus glauca</i>          | <i>Cyclobalanopsis glauca</i>                                         | Rosids                  | W         | T           | P            | 15.52                    | [57, 58]              |
| 838 | <i>Quercus ilex</i>            |                                                                       | Rosids                  | W         | T           | P            | 10.11                    | [72]                  |
| 839 | <i>Quercus laevis</i>          |                                                                       | Rosids                  | W         | T           | P            | 22.55                    | [63]                  |
| 840 | <i>Quercus myrsinifolia</i>    | <i>Quercus myrsinaefolia</i> ,<br><i>Cyclobalanopsis myrsinifolia</i> | Rosids                  | W         | T           | P            | 11.07                    | [58]                  |
| 841 | <i>Quercus phellos</i>         |                                                                       | Rosids                  | W         | T           | P            | 4.53                     | [20]                  |
| 842 | <i>Quercus prinus</i>          |                                                                       | Rosids                  | W         | T           | P            | 14.07                    | [153]                 |
| 843 | <i>Quercus robur</i>           |                                                                       | Rosids                  | W         | T           | P            | 24.38                    | [72]                  |
| 844 | <i>Quercus rubra</i>           |                                                                       | Rosids                  | W         | T           | P            | 21.90                    | [10, 20, 21, 153-155] |
| 845 | <i>Quercus serrata</i>         |                                                                       | Rosids                  | W         | T           | P            | 11.22                    | [58]                  |
| 846 | <i>Quercus velutina</i>        |                                                                       | Rosids                  | W         | T           | P            | 6.74                     | [20, 26]              |
| 847 | <i>Quintinia sieberi</i>       |                                                                       | Asterids                | W         | S           | P            | 7.00                     | [65]                  |
| 848 | <i>Randia spinosa</i>          |                                                                       | Asterids                | W         | S           | P            | 26.16                    | [29]                  |
| 849 | <i>Ranunculus acris</i>        |                                                                       | Other Angiosperms       | NW        | F           | P            | 0.80                     | [31]                  |

|     | species                           | synonym | major taxonomic lineage | woodiness | growth form | life-history | mean percent leaf damage | sources of data      |
|-----|-----------------------------------|---------|-------------------------|-----------|-------------|--------------|--------------------------|----------------------|
| 850 | <i>Ranunculus repens</i>          |         | Other Angiosperms       | NW        | F           | P            | 2.16                     | [31]                 |
| 851 | <i>Raphanus raphanistrum</i>      |         | Rosids                  | NW        | F           | A            | 12.21                    | [156]                |
| 852 | <i>Raphanus sativus</i>           |         | Rosids                  | NW        | F           | A            | 39.80                    | [156]                |
| 853 | <i>Recchia mexicana</i>           |         | Rosids                  | W         | S           | P            | 9.60                     | [29]                 |
| 854 | <i>Renealmia pluriplicata</i>     |         | Monocots                | NW        | F           | P            | 3.10                     | [36]                 |
| 855 | <i>Rhamnus cathartica</i>         |         | Rosids                  | W         | T           | P            | 5.60                     | [10]                 |
| 856 | <i>Rhipidocladum racemiflorum</i> |         | Monocots                | NW        | G           | P            | 0.14                     | [36]                 |
| 857 | <i>Rhizophora apiculata</i>       |         | Rosids                  | W         | T           | P            | 6.10                     | [9, 34]              |
| 858 | <i>Rhizophora lamarckii</i>       |         | Rosids                  | W         | T           | P            | 5.40                     | [34]                 |
| 859 | <i>Rhizophora mangle</i>          |         | Rosids                  | W         | T           | P            | 7.64                     | [66]                 |
| 860 | <i>Rhizophora mucronata</i>       |         | Rosids                  | W         | T           | P            | 1.65                     | [9, 34, 157, 158]    |
| 861 | <i>Rhizophora stylosa</i>         |         | Rosids                  | W         | T           | P            | 6.30                     | [9, 34]              |
| 862 | <i>Rhizophora x</i>               |         | Rosids                  | W         | T           | P            | 1.40                     | [9]                  |
| 863 | <i>Rhus glabra</i>                |         | Rosids                  | W         | S           | P            | 4.98                     | [5]                  |
| 864 | <i>Rhus radicans</i>              |         | Rosids                  | W         | V           | P            | 2.50                     | [10]                 |
| 865 | <i>Rhus typhina</i>               |         | Rosids                  | W         | S           | P            | 7.52                     | [5, 10]              |
| 866 | <i>Rhynchosia reniformis</i>      |         | Rosids                  | NW        | F           | P            | 8.18                     | [63]                 |
| 867 | <i>Ribes cereum</i>               |         | Other Angiosperms       | W         | S           | P            | 7.60                     | [10]                 |
| 868 | <i>Rinorea flavescens</i>         |         | Rosids                  | W         | T           | P            | 13.50                    | [48]                 |
| 869 | <i>Rinorea racemosa</i>           |         | Rosids                  | W         | T           | P            | 15.90                    | [48]                 |
| 870 | <i>Rinorea sylvatica</i>          |         | Rosids                  | W         | S           | P            | 13.18                    | [8]                  |
| 871 | <i>Robinia pseudoacacia</i>       |         | Rosids                  | W         | T           | P            | 9.95                     | [5, 10, 20, 24, 159] |
| 872 | <i>Robinsonella mirandae</i>      |         | Rosids                  | W         | T           | P            | 7.04                     | [4]                  |
| 873 | <i>Rosa arkansana</i>             |         | Rosids                  | W         | S           | P            | 2.68                     | [30]                 |

|     | species                        | synonym | major taxonomic lineage | woodiness | growth form | life-history | mean percent leaf damage | sources of data |
|-----|--------------------------------|---------|-------------------------|-----------|-------------|--------------|--------------------------|-----------------|
| 874 | <i>Rosa canina</i>             |         | Rosids                  | W         | V           | P            | 17.49                    | [104]           |
| 875 | <i>Rubus allegheniensis</i>    |         | Rosids                  | NW        | F           | P            | 2.73                     | [23]            |
| 876 | <i>Rubus chamaemorus</i>       |         | Rosids                  | NW        | F           | P            | 1.92                     | [160]           |
| 877 | <i>Rubus ellipticus</i>        |         | Rosids                  | W         | S           | P            | 10.87                    | [37]            |
| 878 | <i>Rubus hawaiiensis</i>       |         | Rosids                  | W         | S           | P            | 16.07                    | [37]            |
| 879 | <i>Rubus spp.</i>              |         | Rosids                  | W         | S           | P            | 32.00                    | [11]            |
| 880 | <i>Rumex acetosa</i>           |         | Other Angiosperms       | NW        | F           | P            | 3.68                     | [31, 161]       |
| 881 | <i>Rumex acetosella</i>        |         | Other Angiosperms       | NW        | F           | P            | 2.19                     | [5, 44]         |
| 882 | <i>Rumex densiflorus</i>       |         | Other Angiosperms       | NW        | F           | P            | 40.50                    | [10]            |
| 883 | <i>Rumex hastatulus</i>        |         | Other Angiosperms       | NW        | F           | P            | 1.82                     | [5]             |
| 884 | <i>Ruprechtia fusca</i>        |         | Other Angiosperms       | W         | T           | P            | 14.36                    | [28, 29]        |
| 885 | <i>Sabatia angularis</i>       |         | Asterids                | NW        | F           | A            | 4.26                     | [5]             |
| 886 | <i>Sabicea brasiliensis</i>    |         | Asterids                | W         | S           | P            | 12.03                    | [64]            |
| 887 | <i>Sagittaria latifolia</i>    |         | Monocots                | NW        | F           | P            | 1.01                     | [130]           |
| 888 | <i>Salacia cordata</i>         |         | Rosids                  | W         | V           | P            | 9.80                     | [4]             |
| 889 | <i>Salix eriocarpa</i>         |         | Rosids                  | W         | T           | P            | 10.76                    | [162]           |
| 890 | <i>Salix gilgiana</i>          |         | Rosids                  | W         | T           | P            | 10.85                    | [162]           |
| 891 | <i>Salix miyabeana</i>         |         | Rosids                  | W         | T           | P            | 11.48                    | [163]           |
| 892 | <i>Salix myrsinifolia</i>      |         | Rosids                  | W         | T           | P            | 1.85                     | [164, 165]      |
| 893 | <i>Salix phlycifolia</i>       |         | Rosids                  | W         | T           | P            | 4.69                     | [164, 165]      |
| 894 | <i>Salix reticulata</i>        |         | Rosids                  | W         | S           | P            | 2.01                     | [30]            |
| 895 | <i>Salix triandra</i>          |         | Rosids                  | W         | T           | P            | 9.16                     | [166]           |
| 896 | <i>Sanguinaria canadensis</i>  |         | Other Angiosperms       | NW        | F           | P            | 6.40                     | [10]            |
| 897 | <i>Sanguisorba officinalis</i> |         | Rosids                  | NW        | F           | P            | 0.65                     | [31]            |
| 898 | <i>Sarcocephalus latifolia</i> |         | Asterids                | W         | S           | P            | 6.90                     | [81]            |
| 899 | <i>Schaueria</i>               |         | Asterids                | W         | S           | P            | 14.20                    | [4]             |

|     | species                           | synonym                   | major taxonomic lineage | woodiness | growth form | life-history | mean percent leaf damage | sources of data |
|-----|-----------------------------------|---------------------------|-------------------------|-----------|-------------|--------------|--------------------------|-----------------|
|     | <i>calycobracea</i>               |                           |                         |           |             |              |                          |                 |
| 900 | <i>Schima superba</i>             |                           | Asterids                | W         | T           | P            | 6.84                     | [57, 58]        |
| 901 | <i>Schinus terebinthifolius</i>   |                           | Rosids                  | W         | S           | P            | 2.76                     | [37]            |
| 902 | <i>Schismatoglottis wallichii</i> |                           | Monocots                | NW        | F           | P            | 1.10                     | [36]            |
| 903 | <i>Schizomeria spp.</i>           |                           | Rosids                  | W         | T           | P            | 36.70                    | [32]            |
| 904 | <i>Scorzoneroides autumnalis</i>  | <i>Leontodon hispidus</i> | Asterids                | NW        | F           | P            | 0.10                     | [31]            |
| 905 | <i>Scyphiphora hydrophyllacea</i> |                           | Asterids                | W         | S           | P            | 0.70                     | [9]             |
| 906 | <i>Securigera varia</i>           | <i>Coronilla varia</i>    | Rosids                  | NW        | V           | P            | 7.92                     | [49]            |
| 907 | <i>Senecio ovatus</i>             |                           | Asterids                | NW        | F           | P            | 20.60                    | [167]           |
| 908 | <i>Senecio pauperculus</i>        |                           | Asterids                | NW        | F           | P            | 4.49                     | [39]            |
| 909 | <i>Senecio vulgaris</i>           |                           | Asterids                | NW        | F           | A            | 5.01                     | [5, 39]         |
| 910 | <i>Senegalia gaumeri</i>          | <i>Acacia gaumeri</i>     | Rosids                  | W         | T           | P            | 2.45                     | [85]            |
| 911 | <i>Senna multijuga</i>            |                           | Rosids                  | W         | T           | P            | 6.50                     | [12]            |
| 912 | <i>Sesbania tomentosa</i>         |                           | Rosids                  | W         | S           | P            | 0.78                     | [37]            |
| 913 | <i>Shepherdia canadensis</i>      |                           | Rosids                  | W         | S           | P            | 1.80                     | [10]            |
| 914 | <i>Shorea acuminatissima</i>      |                           | Rosids                  | W         | T           | P            | 2.52                     | [107]           |
| 915 | <i>Shorea fallax</i>              |                           | Rosids                  | W         | T           | P            | 15.94                    | [126]           |
| 916 | <i>Shorea gibbosa</i>             |                           | Rosids                  | W         | T           | P            | 6.84                     | [109]           |
| 917 | <i>Shorea glaucescens</i>         |                           | Rosids                  | W         | T           | P            | 1.33                     | [107]           |
| 918 | <i>Shorea johorensis</i>          |                           | Rosids                  | W         | T           | P            | 7.93                     | [107]           |
| 919 | <i>Shorea leprosula</i>           |                           | Rosids                  | W         | T           | P            | 16.97                    | [108, 109]      |
| 920 | <i>Shorea multiflora</i>          |                           | Rosids                  | W         | T           | P            | 6.06                     | [126]           |
| 921 | <i>Shorea parvifolia</i>          |                           | Rosids                  | W         | T           | P            | 6.59                     | [107]           |
| 922 | <i>Shorea spp.</i>                |                           | Rosids                  | W         | T           | P            | 12.75                    | [67]            |

|     | species                          | synonym                   | major taxonomic lineage | woodiness | growth form | life-history | mean percent leaf damage | sources of data |
|-----|----------------------------------|---------------------------|-------------------------|-----------|-------------|--------------|--------------------------|-----------------|
| 923 | <i>Silene antirrhina</i>         |                           | Other Angiosperms       | NW        | F           | I            | 0.42                     | [39, 40]        |
| 924 | <i>Silene latifolia</i>          |                           | Other Angiosperms       | NW        | F           | I            | 5.90                     | [10]            |
| 925 | <i>Silene vulgaris</i>           |                           | Other Angiosperms       | NW        | F           | P            | 0.86                     | [39, 40]        |
| 926 | <i>Sloanea australis</i>         |                           | Rosids                  | W         | T           | P            | 6.00                     | [65]            |
| 927 | <i>Sloanea berteriana</i>        | <i>Sloanea berteriana</i> | Rosids                  | W         | T           | P            | 4.13                     | [89]            |
| 928 | <i>Solanum carolinense</i>       |                           | Asterids                | NW        | F           | P            | 20.10                    | [5, 52]         |
| 929 | <i>Solanum dulcamara</i>         |                           | Asterids                | NW        | V           | P            | 10.00                    | [10]            |
| 930 | <i>Solanum ptychanthum</i>       |                           | Asterids                | NW        | F           | A            | 7.88                     | [5]             |
| 931 | <i>Solanum spp.</i>              |                           | Asterids                | NW        | F           | P            | 9.18                     | [4]             |
| 932 | <i>Solanum umbellatum</i>        |                           | Asterids                | W         | T           | P            | 7.50                     | [88]            |
| 933 | <i>Solidago altissima</i>        |                           | Asterids                | NW        | F           | P            | 4.13                     | [44]            |
| 934 | <i>Solidago canadensis</i>       |                           | Asterids                | NW        | F           | I            | 27.65                    | [10, 11]        |
| 935 | <i>Solidago gigantea</i>         |                           | Asterids                | NW        | F           | P            | 2.04                     | [23]            |
| 936 | <i>Solidago missouriensis</i>    |                           | Asterids                | NW        | F           | P            | 3.03                     | [23]            |
| 937 | <i>Solidago rigida</i>           |                           | Asterids                | NW        | F           | P            | 4.69                     | [23]            |
| 938 | <i>Solidago sempervirens</i>     |                           | Asterids                | NW        | F           | P            | 7.70                     | [5, 68]         |
| 939 | <i>Sonneratia alba</i>           |                           | Rosids                  | W         | T           | P            | 8.50                     | [9, 34, 67]     |
| 940 | <i>Sonneratia caseolaris</i>     |                           | Rosids                  | W         | T           | P            | 9.90                     | [9]             |
| 941 | <i>Sonneratia x</i>              |                           | Rosids                  | W         | T           | P            | 7.80                     | [9]             |
| 942 | <i>Sophora chrysophylla</i>      |                           | Rosids                  | W         | T           | P            | 5.26                     | [37]            |
| 943 | <i>Sorghum bicolor</i>           |                           | Monocots                | NW        | G           | A            | 16.40                    | [88]            |
| 944 | <i>Sorocea spp.</i>              |                           | Rosids                  | W         | T           | P            | 6.50                     | [48]            |
| 945 | <i>Spartina alterniflora</i>     |                           | Monocots                | NW        | G           | P            | 1.02                     | [5, 68]         |
| 946 | <i>Spathiphyllum fulvovirens</i> |                           | Monocots                | NW        | F           | P            | 22.10                    | [36]            |
| 947 | <i>Spathodea campanulata</i>     |                           | Asterids                | W         | T           | P            | 3.00                     | [94]            |



|     | species                           | synonym | major taxonomic lineage | woodiness | growth form | life-history | mean percent leaf damage | sources of data |
|-----|-----------------------------------|---------|-------------------------|-----------|-------------|--------------|--------------------------|-----------------|
| 948 | <i>Spermacoce assurgens</i>       |         | Asterids                | NW        | S           | I            | 2.20                     | [62]            |
| 949 | <i>Sphenostemon papuanum</i>      |         | Asterids                | W         | T           | P            | 14.20                    | [32]            |
| 950 | <i>Spondias mombin</i>            |         | Rosids                  | W         | T           | P            | 83.35                    | [8]             |
| 951 | <i>Spondias radlkoferi</i>        |         | Rosids                  | W         | T           | P            | 6.00                     | [4]             |
| 952 | <i>Stachyphrynium griffithii</i>  |         | Monocots                | NW        | F           | P            | 1.00                     | [36]            |
| 953 | <i>Stachytarpheta jamaicensis</i> |         | Asterids                | NW        | F           | I            | 8.33                     | [62]            |
| 954 | <i>Stemmadenia donnellsmithii</i> |         | Asterids                | W         | T           | P            | 4.88                     | [4]             |
| 955 | <i>Stigmaphyllon hypargyreum</i>  |         | Rosids                  | W         | T           | P            | 3.64                     | [61]            |
| 956 | <i>Strombosia scheffleri</i>      |         | Other Angiosperms       | W         | T           | P            | 22.00                    | [94]            |
| 957 | <i>Strychnos mitis</i>            |         | Asterids                | W         | T           | P            | 2.00                     | [94]            |
| 958 | <i>Strychnos tabascana</i>        |         | Asterids                | W         | V           | P            | 8.60                     | [4]             |
| 959 | <i>Swartzia gracilis</i>          |         | Rosids                  | W         | T           | P            | 21.90                    | [48]            |
| 960 | <i>Swartzia grandifolia</i>       |         | Rosids                  | W         | T           | P            | 2.00                     | [48]            |
| 961 | <i>Swartzia simplex</i>           |         | Rosids                  | W         | T           | P            | 6.70                     | [48]            |
| 962 | <i>Swietenia macrophylla</i>      |         | Rosids                  | W         | T           | P            | 7.38                     | [168, 169]      |
| 963 | <i>Symplocos stellaris</i>        |         | Asterids                | W         | S           | P            | 1.46                     | [58]            |
| 964 | <i>Syncarpia glomulifera</i>      |         | Rosids                  | W         | T           | P            | 36.30                    | [7]             |
| 965 | <i>Synoum glandulosum</i>         |         | Rosids                  | W         | T           | P            | 19.71                    | [7]             |
| 966 | <i>Syzygium jambos</i>            |         | Rosids                  | W         | T           | P            | 3.31                     | [12]            |
| 967 | <i>Syzygium malaccense</i>        |         | Rosids                  | W         | T           | P            | 5.28                     | [12]            |
| 968 | <i>Syzygium spp.</i>              |         | Rosids                  | W         | T           | P            | 8.98                     | [32, 51]        |
| 969 | <i>Tabebuia rosea</i>             |         | Asterids                | W         | T           | P            | 6.37                     | [46, 47]        |
| 970 | <i>Tacca integrifolia</i>         |         | Monocots                | NW        | F           | P            | 2.90                     | [36]            |
| 971 | <i>Tachigali versicolor</i>       |         | Rosids                  | W         | T           | P            | 66.40                    | [8]             |

|     | species                           | synonym | major taxonomic lineage | woodiness | growth form | life-history | mean percent leaf damage | sources of data |
|-----|-----------------------------------|---------|-------------------------|-----------|-------------|--------------|--------------------------|-----------------|
| 972 | <i>Tapirira guianensis</i>        |         | Rosids                  | W         | T           | P            | 4.10                     | [82]            |
| 973 | <i>Taraxacum officinale</i>       |         | Asterids                | NW        | F           | A            | 2.08                     | [5, 31, 41]     |
| 974 | <i>Taxus brevifolia</i>           |         | Gymnosperms             | W         | T           | P            | 0.80                     | [2]             |
| 975 | <i>Taxus canadensis</i>           |         | Gymnosperms             | W         | S           | P            | 0.04                     | [1]             |
| 976 | <i>Tephrosia virginiana</i>       |         | Rosids                  | NW        | F           | P            | 14.00                    | [63]            |
| 977 | <i>Terminalia amazonia</i>        |         | Rosids                  | W         | T           | P            | 1.85                     | [47]            |
| 978 | <i>Terminalia macroptera</i>      |         | Rosids                  | W         | T           | P            | 5.30                     | [81]            |
| 979 | <i>Tetracera spp.</i>             |         | Other Angiosperms       | W         | V           | P            | 6.37                     | [51]            |
| 980 | <i>Tetragastris panamensis</i>    |         | Rosids                  | W         | T           | P            | 9.52                     | [8]             |
| 981 | <i>Tetradlea ericifolia</i>       |         | Rosids                  | W         | S           | P            | 23.14                    | [7]             |
| 982 | <i>Thalictrum dioicum</i>         |         | Other Angiosperms       | NW        | F           | P            | 6.90                     | [10]            |
| 983 | <i>Thalictrum fendleri</i>        |         | Other Angiosperms       | NW        | F           | P            | 9.55                     | [53]            |
| 984 | <i>Thelypteris cheilanthoides</i> |         | Ferns                   | NW        | F           | P            | 38.00                    | [70]            |
| 985 | <i>Thelypteris turrialbae</i>     |         | Ferns                   | NW        | F           | P            | 5.50                     | [33]            |
| 986 | <i>Theobroma cacao</i>            |         | Rosids                  | W         | T           | P            | 7.30                     | [88]            |
| 987 | <i>Thermopsis rhombifolia</i>     |         | Rosids                  | NW        | F           | P            | 70.18                    | [30]            |
| 988 | <i>Thinouia tomocarpa</i>         |         | Rosids                  | W         | V           | P            | 13.90                    | [4]             |
| 989 | <i>Thlaspi arvense</i>            |         | Rosids                  | NW        | F           | A            | 1.20                     | [10]            |
| 990 | <i>Thouinia paucidentata</i>      |         | Rosids                  | W         | T           | P            | 6.22                     | [83]            |
| 991 | <i>Thuja occidentalis</i>         |         | Gymnosperms             | W         | T           | P            | 1.91                     | [1]             |
| 992 | <i>Thuja plicata</i>              |         | Gymnosperms             | W         | T           | P            | 0.22                     | [2, 3]          |
| 993 | <i>Tilia americana</i>            |         | Rosids                  | W         | T           | P            | 5.20                     | [10]            |
| 994 | <i>Tilia cordata</i>              |         | Rosids                  | W         | T           | P            | 35.20                    | [170]           |
| 995 | <i>Tillandsia deppeana</i>        |         | Monocots                | NW        | F           | P            | 73.00                    | [91]            |

|      | species                       | synonym                 | major taxonomic lineage | woodiness | growth form | life-history | mean percent leaf damage | sources of data |
|------|-------------------------------|-------------------------|-------------------------|-----------|-------------|--------------|--------------------------|-----------------|
| 996  | <i>Tillandsia juncea</i>      |                         | Monocots                | NW        | F           | P            | 20.00                    | [91]            |
| 997  | <i>Tillandsia multicaulis</i> |                         | Monocots                | NW        | F           | P            | 41.00                    | [91]            |
| 998  | <i>Tillandsia punctulata</i>  |                         | Monocots                | NW        | F           | P            | 65.00                    | [91]            |
| 999  | <i>Tococa bullifera</i>       |                         | Rosids                  | W         | T           | P            | 11.05                    | [136]           |
| 1000 | <i>Tocoyena pittieri</i>      |                         | Asterids                | W         | T           | P            | 30.60                    | [82]            |
| 1001 | <i>Toona australis</i>        |                         | Rosids                  | W         | T           | P            | 4.60                     | [65]            |
| 1002 | <i>Toona ciliata</i>          |                         | Rosids                  | W         | T           | P            | 0.84                     | [12]            |
| 1003 | <i>Tragopogon dubius</i>      |                         | Asterids                | NW        | F           | I            | 5.69                     | [49]            |
| 1004 | <i>Tragopogon pratensis</i>   |                         | Asterids                | NW        | F           | I            | 2.19                     | [10, 31]        |
| 1005 | <i>Trema micrantha</i>        |                         | Rosids                  | W         | T           | P            | 3.17                     | [4]             |
| 1006 | <i>Triadica sebifera</i>      | <i>Sapium sebiferum</i> | Rosids                  | W         | T           | P            | 3.84                     | [25, 95]        |
| 1007 | <i>Trichilia trifolia</i>     |                         | Rosids                  | W         | T           | P            | 4.89                     | [83]            |
| 1008 | <i>Trifolium campestre</i>    |                         | Rosids                  | NW        | F           | I            | 6.49                     | [31]            |
| 1009 | <i>Trifolium dubium</i>       |                         | Rosids                  | NW        | F           | A            | 2.71                     | [31]            |
| 1010 | <i>Trifolium fragiferum</i>   |                         | Rosids                  | NW        | F           | P            | 10.21                    | [31]            |
| 1011 | <i>Trifolium hybridum</i>     |                         | Rosids                  | NW        | F           | P            | 6.01                     | [31, 44]        |
| 1012 | <i>Trifolium pratense</i>     |                         | Rosids                  | NW        | F           | I            | 11.21                    | [10, 31, 41]    |
| 1013 | <i>Trifolium repens</i>       |                         | Rosids                  | NW        | F           | P            | 6.34                     | [10, 31]        |
| 1014 | <i>Trilepisium phoberos</i>   |                         | Rosids                  | W         | T           | P            | 3.00                     | [94]            |
| 1015 | <i>Trillium erectum</i>       |                         | Monocots                | NW        | F           | P            | 5.14                     | [5, 10]         |
| 1016 | <i>Trillium grandiflorum</i>  |                         | Monocots                | NW        | F           | P            | 15.05                    | [5, 171]        |
| 1017 | <i>Trimezia martinicensis</i> |                         | Monocots                | NW        | F           | P            | 0.20                     | [62]            |
| 1018 | <i>Triplaris cumingiana</i>   |                         | Other Angiosperms       | W         | T           | P            | 24.10                    | [82]            |
| 1019 | <i>Trisetum flavescens</i>    |                         | Monocots                | NW        | G           | P            | 1.83                     | [31]            |
| 1020 | <i>Trophis mexicana</i>       |                         | Rosids                  | W         | T           | P            | 0.65                     | [4]             |
| 1021 | <i>Tsuga canadensis</i>       |                         | Gymnosperms             | W         | T           | P            | 0.88                     | [130]           |

|      | species                      | synonym                   | major taxonomic lineage | woodiness | growth form | life-history | mean percent leaf damage | sources of data |
|------|------------------------------|---------------------------|-------------------------|-----------|-------------|--------------|--------------------------|-----------------|
| 1022 | <i>Tsuga heterophylla</i>    |                           | Gymnosperms             | W         | T           | P            | 0.15                     | [2, 3]          |
| 1023 | <i>Tussilago farfara</i>     |                           | Asterids                | NW        | F           | P            | 16.60                    | [10]            |
| 1024 | <i>Ulmus alata</i>           |                           | Rosids                  | W         | T           | P            | 4.91                     | [19, 20]        |
| 1025 | <i>Ulmus spp.</i>            |                           | Rosids                  | W         | T           | P            | 22.00                    | [172]           |
| 1026 | <i>Urera caracasana</i>      |                           | Rosids                  | W         | T           | P            | 13.03                    | [4, 29, 61]     |
| 1027 | <i>Uvariopsis congensis</i>  |                           | Magnoliids              | W         | T           | P            | 3.00                     | [94]            |
| 1028 | <i>Vaccinium myrtillus</i>   |                           | Asterids                | W         | S           | P            | 0.10                     | [173]           |
| 1029 | <i>Vaccinium uliginosum</i>  |                           | Asterids                | W         | S           | P            | 0.54                     | [173]           |
| 1030 | <i>Vaccinium vitis-idaea</i> |                           | Asterids                | W         | S           | P            | 0.05                     | [173]           |
| 1031 | <i>Valeriana edulis</i>      |                           | Asterids                | NW        | F           | P            | 10.70                    | [10]            |
| 1032 | <i>Vatairea lundellii</i>    |                           | Rosids                  | W         | T           | P            | 13.50                    | [4]             |
| 1033 | <i>Verbascum thapsus</i>     |                           | Asterids                | NW        | F           | I            | 2.40                     | [10]            |
| 1034 | <i>Veronica chamaedrys</i>   |                           | Asterids                | NW        | F           | P            | 0.39                     | [31]            |
| 1035 | <i>Viburnum acerifolium</i>  |                           | Asterids                | W         | S           | P            | 12.60                    | [10]            |
| 1036 | <i>Viburnum lantana</i>      |                           | Asterids                | W         | S           | P            | 12.55                    | [104]           |
| 1037 | <i>Vicia americana</i>       |                           | Rosids                  | NW        | F           | P            | 5.55                     | [53]            |
| 1038 | <i>Vicia cracca</i>          |                           | Rosids                  | NW        | F           | P            | 3.68                     | [31]            |
| 1039 | <i>Viguiera multiflora</i>   |                           | Asterids                | NW        | F           | P            | 18.07                    | [10, 53]        |
| 1040 | <i>Vincetoxicum rossicum</i> | <i>Cynanchum rossicum</i> | Asterids                | NW        | V           | P            | 0.81                     | [39, 40]        |
| 1041 | <i>Viola nuttallii</i>       |                           | Rosids                  | NW        | F           | P            | 8.15                     | [53]            |
| 1042 | <i>Virola calophylla</i>     |                           | Magnoliids              | W         | T           | P            | 7.20                     | [48]            |
| 1043 | <i>Vitex hemsleyi</i>        |                           | Asterids                | W         | S           | P            | 16.10                    | [29]            |
| 1044 | <i>Vitis riparia</i>         |                           | Rosids                  | W         | V           | P            | 8.20                     | [10]            |
| 1045 | <i>Vitis tiliifolia</i>      |                           | Rosids                  | W         | V           | P            | 1.89                     | [61]            |
| 1046 | <i>Vouarana guianensis</i>   |                           | Rosids                  | W         | T           | P            | 3.80                     | [48]            |
| 1047 | <i>Vriesea sanguinolenta</i> |                           | Monocots                | NW        | F           | P            | 2.83                     | [174]           |

|      | species                         | synonym | major taxonomic lineage | woodiness | growth form | life-history | mean percent leaf damage | sources of data |
|------|---------------------------------|---------|-------------------------|-----------|-------------|--------------|--------------------------|-----------------|
| 1048 | <i>Welfia regia</i>             |         | Monocots                | W         | T           | P            | 3.50                     | [36]            |
| 1049 | <i>Wilkiea huegeliana</i>       |         | Magnoliids              | W         | S           | P            | 2.20                     | [65]            |
| 1050 | <i>Xanthosia pilosa</i>         |         | Asterids                | W         | S           | P            | 1.19                     | [7]             |
| 1051 | <i>Xylocarpus australasicus</i> |         | Rosids                  | W         | T           | P            | 5.17                     | [9, 34]         |
| 1052 | <i>Xylocarpus granatum</i>      |         | Rosids                  | W         | T           | P            | 8.45                     | [9]             |
| 1053 | <i>Xylocarpus mekongensis</i>   |         | Rosids                  | W         | T           | P            | 9.70                     | [34]            |
| 1054 | <i>Xylocarpus moluccensis</i>   |         | Rosids                  | W         | T           | P            | 0.24                     | [34]            |
| 1055 | <i>Xylomelum pyriforme</i>      |         | Other Angiosperms       | W         | T           | P            | 18.80                    | [7]             |
| 1056 | <i>Yucca filamentosa</i>        |         | Monocots                | W         | S           | P            | 0.11                     | [5]             |
| 1057 | <i>Zieria laevigata</i>         |         | Rosids                  | W         | S           | P            | 11.70                    | [7]             |
| 1058 | <i>Zieria pilosa</i>            |         | Rosids                  | W         | S           | P            | 41.47                    | [7]             |

7

8

## 9 **References for Table S6**

- 10
- 11 [1] Johnson, MTJ. Table S1.
- 12 [2] Shaw, DC, Ernest, KA, Rinker, HB & Lowman, MD. 2006 Stand-level herbivory in an old-growth conifer forest canopy.  
13 *West. N. Am. Nat.* **66**, 473-481. (doi:10.3398/1527-0904(2006)66[473:shiaoc]2.0.co;2).
- 14 [3] Schowalter, TD & Ganio, LM. 1998 Vertical and seasonal variation in canopy arthropod communities in an old-growth  
15 conifer forest in southwestern Washington, USA. *Bull. Entomol. Res.* **88**, 633-640.
- 16 [4] De La Cruz, M & Dirzo, R. 1987 A survey of the standing levels of herbivory in seedlings from a Mexican rain forest.  
17 *Biotropica* **19**, 98-106.
- 18 [5] Johnson, MTJ & Broadhead, GT. Table S1.
- 19 [6] Andrew, NR & Hughes, L. 2005 Herbivore damage along a latitudinal gradient: relative impacts of different feeding guilds.  
20 *Oikos* **108**, 176-182.
- 21 [7] Moles, AT & Westoby, M. 2000 Do small leaves expand faster than large leaves, and do shorter expansion times reduce  
22 herbivore damage? *Oikos* **90**, 517-524.

- 23 [8] Richards, LA & Coley, PD. 2007 Seasonal and habitat differences affect the impact of food and predation on herbivores: a  
24 comparison between gaps and understory of a tropical forest. *Oikos* **116**, 31-40. (doi:Doi 10.1111/J.2006.0030-  
25 1299.15043.X).
- 26 [9] Robertson, AI & Duke, NC. 1987 Insect herbivory on mangrove leaves in North Queensland. *Aust. J. Ecol.* **12**, 1-7.
- 27 [10] Ness, JH, Rollinson, EJ & Whitney, KD. 2011 Phylogenetic distance can predict susceptibility to attack by natural enemies.  
28 *Oikos* **120**, 1327-1334. (doi:10.1111/j.1600-0706.2011.19119.x).
- 29 [11] Sanders, NJ, Belote, RT & Weltzin, JF. 2004 Multitrophic effects of elevated atmospheric CO<sub>2</sub> on understory plant and  
30 arthropod communities. *Environ. Entomol.* **33**, 1609-1616.
- 31 [12] Dawson, W, Burslem, DFRP & Hulme, PE. 2009 Herbivory is related to taxonomic isolation, but not to invasiveness of  
32 tropical alien plants. *Divers. Distrib.* **15**, 141-147. (doi:10.1111/j.1472-4642.2008.00527.x).
- 33 [13] Marquis, RJ. 1988 Intra-crown variation in leaf herbivory and seed production in striped maple, *Acer pensylvanicum* L.  
34 (Aceraceae). *Oecologia* **77**, 51-55. (doi:10.1007/bf00380924).
- 35 [14] Adams, JM, Fang, W, Callaway, RM, Cipollini, D & Newell, E. 2009 A cross-continental test of the Enemy Release  
36 Hypothesis: leaf herbivory on *Acer platanoides* (L.) is three times lower in North America than in its native Europe. *Biol*  
37 *Invasions* **11**, 1005-1016. (doi:10.1007/s10530-008-9312-4).

- 38 [15] Sobek, S, Scherber, C, Steffan-Dewenter, I & Tschardtke, T. 2009 Sapling herbivory, invertebrate herbivores and predators  
39 across a natural tree diversity gradient in Germany's largest connected deciduous forest. *Oecologia* **160**, 279-288.  
40 (doi:10.1007/s00442-009-1304-2).
- 41 [16] Skinner, GJ & Whittaker, JB. 1981 An experimental investigation of inter-relationships between the wood-ant (*Formica*  
42 *rufa*) and some tree-canopy herbivores. *J. Anim. Ecol.* **50**, 313-326.
- 43 [17] Whittaker, JB & Warrington, S. 1985 An experimental field study of different levels of insect herbivory induced by  
44 *Formica rufa* predation on sycamore (*Acer pseudoplatanus*) III. Effects on tree growth. *J. Appl. Ecol.* **22**, 797-811.
- 45 [18] Fry, HRC, Quiring, DT, Ryall, KL & Dixon, PL. 2008 Relationships between elm spanworm, *Ennomos subsignaria*,  
46 juvenile density and defoliation on mature sycamore maple in an urban environment. *For. Ecol. Manage.* **255**, 2726-2732.  
47 (doi:10.1016/j.foreco.2008.01.039).
- 48 [19] Hamilton, JG, Zangerl, AR, Berenbaum, MR, Phippen, J, Aldea, M & DeLucia, EH. 2004 Insect herbivory in an intact forest  
49 understory under experimental CO2 enrichment. *Oecologia* **138**, 566-573. (doi:10.1007/s00442-003-1463-5).
- 50 [20] Knepp, RG, Hamilton, JG, Mohan, JE, Zangerl, AR, Berenbaum, MR & DeLucia, EH. 2005 Elevated CO2 reduces leaf  
51 damage by insect herbivores in a forest community. *New Phytol.* **167**, 207-218. (doi:10.1111/j.1469-8137.2005.01399.x).
- 52 [21] Reynolds, BC & Crossley Jr, DA. 1997 Spatial variation in herbivory by forest canopy arthropods along an elevation  
53 gradient. *Environ. Entomol.* **26**, 1232-1239.



- 54 [22] Adams, JM & Zhang, Y. 2009 Is there more insect folivory in warmer temperate climates? A latitudinal comparison of  
55 insect folivory in eastern North America. *J. Ecol.* **97**, 933-940. (doi:10.1111/j.1365-2745.2009.01523.x).
- 56 [23] Schnitzer, SA, Reich, PB, Bergner, B & Carson, WP. 2002 Herbivore and pathogen damage on grassland and woodland  
57 plants: a test of the herbivore uncertainty principle. *Ecol. Lett.* **5**, 531-539. (doi:10.1046/j.1461-0248.2002.00357.x).
- 58 [24] Shure, DJ & Wilson, LA. 1993 Patch-size effects on plant phenolics in successional openings of the Southern Appalachians.  
59 *Ecology* **74**, 55-67.
- 60 [25] Hartley, MK, Rogers, WE & Siemann, E. 2010 Comparisons of arthropod assemblages on an invasive and native trees:  
61 abundance, diversity and damage. *Arthropod-Plant Interactions* **4**, 237-245. (doi:10.1007/s11829-010-9105-4).
- 62 [26] Bray, JR. 1964 Primary consumption in three forest canopies. *Ecology* **45**, 165-167.
- 63 [27] Strong, AM, Sherry, TW & Holmes, RT. 2000 Bird predation on herbivorous insects: indirect effects on sugar maple  
64 saplings. *Oecologia* **125**, 370-379.
- 65 [28] Pascual-Alvarado, E, Cuevas-Reyes, P, Quesada, M & Oyama, K. 2008 Interactions between galling insects and leaf-  
66 feeding insects: the role of plant phenolic compounds and their possible interference with herbivores. *J. Trop. Ecol.* **24**, 329-  
67 336. (doi:10.1017/s0266467408005038).
- 68 [29] Cuevas-Reyes, P, Quesada, M & Oyama, K. 2006 Abundance and leaf damage caused by gall-inducing insects in a Mexican  
69 tropical dry forest. *Biotropica* **38**, 107-115. (doi:10.1111/j.1744-7429.2006.00115.x).

- 70 [30] Hik, DS, Brown, M, Dabros, A, Weir, J & Cahill Jr, JF. 2003 Prevalence and predictability of handling effects in field  
71 studies: results from field experiments and a meta-analysis. *Am. J. Bot.* **90**, 270-277.
- 72 [31] Loranger, H, Weisser, WW, Ebeling, A, Eggers, T, De Lucca, E, Loranger, J, Roscher, C & Meyer, ST. 2013 Invertebrate  
73 herbivory increases along an experimental gradient in grassland plant diversity. *Oecologia*, 1-11. (doi:DOI 10.1007/s00442-  
74 013-2741-5).
- 75 [32] Edwards, PJ. 1977 Studies of mineral cycling in a montane rain forest in New Guinea: II. The production and disappearance  
76 of litter. *J. Ecol.* **65**, 971-992.
- 77 [33] Hendrix, SD & Marquis, RJ. 1983 Herbivore damage to three tropical ferns. *Biotropica* **15**, 108-111.
- 78 [34] Johnstone, IM. 1981 Consumption of leaves by herbivores in mixed mangrove stands. *Biotropica* **13**, 252-259.
- 79 [35] del-Val, E & Armesto, JJ. 2010 Seedling mortality and herbivory damage in subtropical and temperate populations: testing  
80 the hypothesis of higher herbivore pressure toward the tropics. *Biotropica* **42**, 174-179. (doi:10.1111/j.1744-  
81 7429.2009.00554.x).
- 82 [36] Grubb, PJ, Jackson, RV, Barberis, IM, Bee, JN, Coomes, DA, Dominy, NJ, De la Fuente, MAS, Lucas, PW, Metcalfe, DJ,  
83 Svenning, JC, et al. 2008 Monocot leaves are eaten less than dicot leaves in tropical lowland rain forests: correlations with  
84 toughness and leaf presentation. *Ann. Bot.* **101**, 1379-1389. (doi:Doi 10.1093/Aob/Mcn047).

- 85 [37] Funk, JL & Throop, HL. 2010 Enemy release and plant invasion: patterns of defensive traits and leaf damage in Hawaii.  
86 *Oecologia* **162**, 815-823. (doi:10.1007/s00442-009-1497-4).
- 87 [38] Mack, AL, Ickes, K, Jessen, JH, Kennedy, B & Sinclair, JR. 1999 Ecology of *Aglaia mackiana* (Meliaceae) seedlings in a  
88 New Guinea rain forest. *Biotropica* **31**, 111-120.
- 89 [39] Agrawal, AA & Kotanen, PM. 2003 Herbivores and the success of exotic plants: a phylogenetically controlled experiment.  
90 *Ecol. Lett.* **6**, 712-715. (doi:10.1046/j.1461-0248.2003.00498.x).
- 91 [40] Agrawal, AA, Kotanen, PM, Mitchell, CE, Power, AG, Godsoe, W & Klironomos, J. 2005 Enemy release? An experiment  
92 with congeneric plant pairs and diverse above- and belowground enemies. *Ecology* **86**, 2979-2989.
- 93 [41] Unsicker, SB, Baer, N, Kahmen, A, Wagner, M, Buchmann, N & Weisser, WW. 2006 Invertebrate herbivory along a  
94 gradient of plant species diversity in extensively managed grasslands. *Oecologia* **150**, 233-246. (doi:10.1007/s00442-006-  
95 0511-3).
- 96 [42] Evans, JA & Landis, DA. 2007 Pre-release monitoring of *Alliaria petiolata* (garlic mustard) invasions and the impacts of  
97 extant natural enemies in southern Michigan forests. *Biol. Control* **42**, 300-307. (doi:10.1016/j.biocontrol.2007.05.018).
- 98 [43] Délano-Frier, JP, Martínez-Gallardo, NA, Martínez-De La Vega, O, Salas-Araiza, MD, Barbosa-Jaramillo, ER, Torres, A,  
99 Vargas, P & Borodanenko, A. 2004 The effect of exogenous jasmonic acid on induced resistance and productivity in

- 100        amaranth (*Amaranthus hypochondriacus*) is influenced by environmental conditions. *J. Chem. Ecol.* **30**, 1001-1034.  
101        (doi:10.1023/B:JOEC.0000028464.36353.bb).
- 102        [44] Carson, WP & Root, RB. 1999 Top-down effects of insect herbivores during early succession: influence on biomass and  
103        plant dominance. *Oecologia* **121**, 260-272. (doi:10.1007/s004420050928).
- 104        [45] MacKay, J & Kotanen, PM. 2008 Local escape of an invasive plant, common ragweed (*Ambrosia artemisiifolia* L.), from  
105        above-ground and below-ground enemies in its native area. *J. Ecol.* **96**, 1152-1161. (doi:10.1111/j.1365-2745.2008.01426.x).
- 106        [46] Plath, M, Mody, K, Potvin, C & Dorn, S. 2011 Establishment of native tropical timber trees in monoculture and mixed-  
107        species plantations: small-scale effects on tree performance and insect herbivory. *For. Ecol. Manage.* **261**, 741-750.  
108        (doi:10.1016/j.foreco.2010.12.004).
- 109        [47] Mingaleva, NA, Pestov, SV & Zagirova, SV. 2011 Health status and biological damage to tree leaves in green areas of  
110        Syktyvkar. *Contemp. Prob. Ecol.* **4**, 310-318. (doi:10.1134/s1995425511030106).
- 111        [48] Lamarre, GP, Baraloto, C, Fortunel, C, Dávila, N, Mesones, I, Grandez Ríos, J, Ríos, M, Valderrama, E, Vasquez Pilco, M  
112        & Fine, PVA. 2012 Herbivory, growth strategies and habitat specialization in tropical tree lineages: implications for Amazon  
113        beta-diversity. *Ecology* **93**, S195–S210. (doi:10.1890/11-0397.1).
- 114        [49] Han, X, Dendy, SP, Garrett, KA, Fang, L & Smith, MD. 2008 Comparison of damage to native and exotic tallgrass prairie  
115        plants by natural enemies. *Plant Ecol.* **198**, 197-210. (doi:10.1007/s11258-008-9395-0).

- 116 [50] Lowman, MD & Heatwole, H. 1992 Spatial and temporal variability in defoliation of Australian eucalypts. *Ecology* **73**, 129-  
117 142.
- 118 [51] Wint, GRW. 1983 Leaf damage in tropical rain forest canopies. In *Tropical rain forest: ecology and management* (eds. S.L.  
119 Sutton, T.C. Whitmore & A.C. Chadwick), pp. 229-239. Oxford, Springer.
- 120 [52] Cahill Jr, JF, Castelli, JP & Casper, BB. 2001 The herbivory uncertainty principle: visiting plants can alter herbivory.  
121 *Ecology* **82**, 307-312.
- 122 [53] Louda, SM, Dixon, PM & Huntly, NJ. 1987 Herbivory in sun versus shade at a natural meadow-woodland ecotone in the  
123 Rocky Mountains. *Vegetatio* **72**, 141-149. (doi:10.1007/bf00039835).
- 124 [54] Løe, G, Toräng, P, Gaudeul, M & Ågren, J. 2007 Trichome production and spatiotemporal variation in herbivory in the  
125 perennial herb *Arabidopsis lyrata*. *Oikos* **116**, 134-142. (doi:10.1111/j.2006.0030-1299.15022.x).
- 126 [55] Mauricio, R & Rausher, MD. 1997 Experimental manipulation of putative selective agents provides evidence for the role of  
127 natural enemies in the evolution of plant defense. *Evolution* **51**, 1435-1444.
- 128 [56] Akiyama, R & Agren, J. 2012 Magnitude and timing of leaf damage affect seed production in a natural population of  
129 *Arabidopsis thaliana* (Brassicaceae). *PLoS ONE* **7**, e30015. doi: 30010.31371/journal.pone.0030015.

- 130 [57] Schuldt, A, Baruffol, M, Böhnke, M, Bruelheide, H, Härdtle, W, Lang, AC, Nadrowski, K, von Oheimb, G, Voigt, W,  
131 Zhou, H, et al. 2010 Tree diversity promotes insect herbivory in subtropical forests of south-east China. *J. Ecol.* **98**, 917-926.  
132 (doi:10.1111/j.1365-2745.2010.01659.x).
- 133 [58] Schuldt, A, Bruelheide, H, Durka, W, Eichenberg, D, Fischer, M, Kröber, W, Härdtle, W, Ma, K, Michalski, SG, Palm, W-  
134 U, et al. 2012 Plant traits affecting herbivory on tree recruits in highly diverse subtropical forests. *Ecol. Lett.* **15**, 732-739.  
135 (doi:10.1111/j.1461-0248.2012.01792.x).
- 136 [59] Vásquez, PA, Grez, AA, Bustamante, RO & Simonetti, JA. 2007 Herbivory, foliar survival and shoot growth in fragmented  
137 populations of *Aristotelia chilensis*. *Acta Oecol.* **31**, 48-53. (doi:10.1016/j.actao.2006.03.006).
- 138 [60] Bruelheide, H & Scheidel, U. 1999 Slug herbivory as a limiting factor for the geographical range of *Arnica montana*. *J.*  
139 *Ecol.* **87**, 839-848. (doi:10.1046/j.1365-2745.1999.00403.x).
- 140 [61] Van Bael, SA, Aiello, A, Valderrama, A, Medianero, E, Samaniego, M & Wright, SJ. 2004 General herbivore outbreak  
141 following an El Niño-related drought in a lowland Panamanian forest. *J. Trop. Ecol.* **20**, 625-633.  
142 (doi:10.1017/s0266467404001725).
- 143 [62] Godfray, RM. Table S1.
- 144 [63] Knight, TM & Holt, RD. 2005 Fire generates spatial gradients in herbivory: an example from a Florida sandhill ecosystem.  
145 *Ecology* **86**, 587-593.

- 146 [64] Marquis, RJ, Diniz, IR & Morais, HC. 2001 Patterns and correlates of interspecific variation in foliar insect herbivory and  
147 pathogen attack in Brazilian cerrado. *J. Trop. Ecol.* **17**, 127-148.
- 148 [65] Lowman, MD. 1992 Herbivory in Australian rain forests, with particular reference to the canopies of *Doryphora sassafras*  
149 (Monimiaceae). *Biotropica* **24**, 263-272.
- 150 [66] Erickson, AA, Bell, SS & Dawes, CJ. 2004 Does mangrove leaf chemistry help explain crab herbivory patterns? *Biotropica*  
151 **36**, 333-343.
- 152 [67] Cooke, FP, Brown, JB & Mole, S. 1984 Herbivory, foliar enzyme inhibitors, nitrogen and leaf structure of young and  
153 mature leaves in a tropical forest. *Biotropica* **16**, 257-263.
- 154 [68] Pennings, SC, Ho, CK, Salgado, CS, Wieski, K, Dave, N, Kunza, AE & Wason, EL. 2009 Latitudinal variation in herbivore  
155 pressure in Atlantic Coast salt marshes. *Ecology* **90**, 183-195.
- 156 [69] Rudgers, JA & Whitney, KD. 2006 Interactions between insect herbivores and a plant architectural dimorphism. *J. Ecol.* **94**,  
157 1249-1260. (doi:10.1111/j.1365-2745.2006.01161.x).
- 158 [70] Balick, MJ, Furth, DG & Cooperdriver, G. 1978 Biochemical and evolutionary aspects of arthropod predation on ferns.  
159 *Oecologia* **35**, 55-89.
- 160 [71] Stoll, P, Dolt, C, Goverde, M & Baur, B. 2006 Experimental habitat fragmentation and invertebrate grazing in a herbaceous  
161 grassland species. *Basic Appl. Ecol.* **7**, 307-319. (doi:10.1016/j.baae.2005.09.001).

- 162 [72] Giffard, B, Corcket, E, Barbaro, L & Jactel, H. 2011 Bird predation enhances tree seedling resistance to insect herbivores in  
163 contrasting forest habitats. *Oecologia*, 1-10. (doi:10.1007/s00442-011-2089-7).
- 164 [73] Kozlov, MV. 2008 Losses of birch foliage due to insect herbivory along geographical gradients in Europe: a climate-driven  
165 pattern? *Clim. Change* **87**, 107-117. (doi:10.1007/s10584-007-9348-y).
- 166 [74] Mehlreter, K & Tolome, J. 2008 Herbivory on three tropical fern species of a Mexican cloud forest. In *Pteridology in the*  
167 *New Millenium* (eds. S. Chandra & M. Srivastava), pp. 375-381, Kluwer Academic Publishers.
- 168 [75] Roy, BA, Coulson, T, Blaser, W, Policha, T, Stewart, JL, Blaisdell, GK & GüSewell, S. 2011 Population regulation by  
169 enemies of the grass *Brachypodium sylvaticum*: demography in native and invaded ranges. *Ecology* **92**, 665-675.  
170 (doi:10.1890/09-2006.1).
- 171 [76] Bommarco, R, Miranda, F, Bylund, H & Björkman, C. 2011 Insecticides suppress natural enemies and increase pest damage  
172 in cabbage. *J. Econ. Entomol.* **104**, 782-791. (doi:10.1603/ec10444).
- 173 [77] Harvey, CT & Eubanks, MD. 2004 Effect of habitat complexity on biological control by the red imported fire ant  
174 (Hymenoptera: Formicidae) in collards. *Biol. Control* **29**, 348-358. (doi:10.1016/j.biocontrol.2003.08.006).
- 175 [78] Picoaga, A, Cartea, ME, Soengas, P, Monetti, L & Ordás, A. 2003 Resistance of kale populations to lepidopterous pests in  
176 northwestern Spain. *J. Econ. Entomol.* **96**, 143-147.



- 177 [79] Liu, TX. 2000 Population dynamics of *Bemisia argentifolii* (Homoptera: Aleyrodidae) on spring collard and relationship to  
178 yield in the Lower Rio Grande Valley of Texas. *J. Econ. Entomol.* **93**, 750-756.
- 179 [80] Moyes, CL, Collin, HA, Britton, G & Raybould, AF. 2000 Glucosinolates and differential herbivory in wild populations of  
180 *Brassica oleracea*. *J. Chem. Ecol.* **26**, 2625-2641. (doi:10.1023/a:1005549115751).
- 181 [81] Unsicker, SB & Mody, K. 2005 Influence of tree species and compass bearing on insect folivory of nine common tree  
182 species in the West African savanna. *J. Trop. Ecol.* **21**, 227-231. (doi:10.1017/s0266467404002196).
- 183 [82] Brenes-Arguedas, T, Coley, PD & Kursar, TA. 2009 Pests vs. drought as determinants of plant distribution along a tropical  
184 rainfall gradient. *Ecology* **90**, 1751-1761. (doi:10.1890/08-1271.1).
- 185 [83] Filip, V, Dirzo, R, Maass, JM & Sarukhan, J. 1995 Within- and among-year variation in the levels of herbivory on the  
186 foliage of trees from a Mexican tropical deciduous forest. *Biotropica* **27**, 78-86.
- 187 [84] Boege, K. 2004 Induced responses in three tropical dry forest plant species - direct and indirect effects on herbivory. *Oikos*  
188 **107**, 541-548. (doi:10.1111/j.0030-1299.2004.13272.x).
- 189 [85] Campo, J & Dirzo, R. 2003 Leaf quality and herbivory responses to soil nutrient addition in secondary tropical dry forests of  
190 Yucatán, Mexico. *J. Trop. Ecol.* **19**, 525-530. (doi:10.1017/s0266467403003572).
- 191 [86] Horvitz, CC & Schemske, DW. 2002 Effects of plant size, leaf herbivory, local competition and fruit production on  
192 survival, growth and future reproduction of a neotropical herb. *J. Ecol.* **90**, 279-290. (doi:10.1046/j.1365-2745.2001.00660.x).

- 193 [87] Yang, LH. 2008 Pulses of dead periodical cicadas increase herbivory of American bellflowers. *Ecology* **89**, 1497-1502.  
194 (doi:10.1890/07-1853.1).
- 195 [88] Ewel, J, Benedict, F, Berish, C, Brown, B, Gliessman, S, Amador, M, Bermúdez, R, Martínez, A, Miranda, R & Price, N.  
196 1982 Leaf area, light transmission, roots and leaf damage in nine tropical plant communities. *Agro-Ecosystems* **7**, 305-326.
- 197 [89] Schowalter, TD. 1994 Invertebrate community structure and herbivory in a tropical rain-forest canopy in Puerto-Rico  
198 following hurricane Hugo. *Biotropica* **26**, 312-319.
- 199 [90] Boege, K. 2005 Herbivore attack in *Casearia nitida* influenced by plant ontogenetic variation in foliage quality and plant  
200 architecture. *Oecologia* **143**, 117-125. (doi:10.1007/s00442-004-1779-9).
- 201 [91] Winkler, M, Hülber, K, Mehltreter, K, Franco, JG & Hietz, P. 2005 Herbivory in epiphytic bromeliads, orchids and ferns in  
202 a Mexican montane forest. *J. Trop. Ecol.* **21**, 147-154. (doi:10.1017/s0266467404002081).
- 203 [92] Nunez-Farfan, J & Dirzo, R. 1989 Leaf survival in relation to herbivory in two tropical pioneer species. *Oikos* **55**, 71-74.
- 204 [93] Myster, RW. 2002 Foliar pathogen and insect herbivore effects on two landslide tree species in Puerto Rico. *For. Ecol.*  
205 *Manage.* **169**, 231-242. (doi:10.1016/s0378-1127(01)00757-5).
- 206 [94] Burgess, MA & Chapman, CA. 2005 Tree leaf chemical characters: selective pressures by folivorous primates and  
207 invertebrates. *Afr. J. Ecol.* **43**, 242-250. (doi:10.1111/j.1365-2028.2005.00578.x).

- 208 [95] Siemann, E & Rogers, WE. 2003 Herbivory, disease, recruitment limitation, and success of alien and native tree species.  
209 *Ecology* **84**, 1489-1505.
- 210 [96] do Nascimento, EA & Del-Claro, K. 2010 Ant visitation to extrafloral nectaries decreases herbivory and increases fruit set  
211 in *Chamaecrista debilis* (Fabaceae) in a Neotropical savanna. *Flora: Morphology, Distribution, Functional Ecology of Plants*  
212 **205**, 754-756. (doi:10.1016/j.flora.2009.12.040).
- 213 [97] Abdala-Roberts, L & Marquis, RJ. 2007 Test of local adaptation to biotic interactions and soil abiotic conditions in the ant-  
214 tended *Chamaecrista fasciculata* (Fabaceae). *Oecologia* **154**, 315-326. (doi:10.1007/s00442-007-0831-y).
- 215 [98] Cepeda-Cornejo, V & Dirzo, R. 2010 Sex-related differences in reproductive allocation, growth, defense and herbivory in  
216 three dioecious neotropical palms. *PLoS ONE* **5**, e9824. doi:9810.1371/journal.pone.0009824. (doi:ARTN e9824  
217 DOI 10.1371/journal.pone.0009824).
- 218 [99] Benitez-Malvido, J & Kossmann-Ferraz, ID. 1999 Litter cover variability affects seedling performance and herbivory.  
219 *Biotropica* **31**, 598-606.
- 220 [100] Garcia-Marí, F, Granda, C, Zaragoza, S & Agustí, M. 2002 Impact of *Phyllocnistis citrella* (Lepidoptera: Gracillariidae) on  
221 leaf area development and yield of mature citrus trees in the Mediterranean area. *J. Econ. Entomol.* **95**, 966-974.
- 222 [101] Spiller, DA & Schooner, TW. 1997 Folivory on islands with and without insectivorous lizards: an eight-year study. *Oikos*  
223 **78**, 15-22.

- 224 [102] Aide, TM & Zimmerman, JK. 1990 Patterns of insect herbivory, growth, and survivorship in juveniles of a neotropical  
225 liana. *Ecology* **71**, 1412-1421.
- 226 [103] Spiller, DA & Agrawal, AA. 2003 Intense disturbance enhances plant susceptibility to herbivory: natural and experimental  
227 evidence. *Ecology* **84**, 890-897.
- 228 [104] Jackson, RV, Kollmann, J, Grubb, PJ & Bee, JN. 1999 Insect herbivory on European tall-shrub species: the need to  
229 distinguish leaves before and after unfolding or unrolling, and the advantage of longitudinal sampling. *Oikos* **87**, 561-570.
- 230 [105] Alonso, C & Herrera, CM. 1996 Variation in herbivory within and among plants of *Daphne laureola* (Thymelaeaceae):  
231 correlation with plant size and architecture. *J. Ecol.* **84**, 495-502.
- 232 [106] Boege, K & Dirzo, R. 2004 Intraspecific variation in growth, defense and herbivory in *Dialium guianense*  
233 (Caesalpinaceae) mediated by edaphic heterogeneity. *Plant Ecol.* **175**, 59-69. (doi:10.1023/B:VEGE.0000048092.82296.9a).
- 234 [107] Bebbier, DP, Brown, ND & Speight, MR. 2004 Dipterocarp seedling population dynamics in Bornean primary lowland  
235 forest during the 1997-8 El Niño-Southern Oscillation. *J. Trop. Ecol.* **20**, 11-19. (doi:10.1017/s0266467404006133).
- 236 [108] Howlett, BE & Davidson, DW. 2001 Herbivory on planted dipterocarp seedlings in secondary logged forests and primary  
237 forests of Sabah, Malaysia. *J. Trop. Ecol.* **17**, 285-302. (doi:10.1017/s0266467401001195).
- 238 [109] Massey, FP, Massey, K, Press, MC & Hartley, SE. 2006 Neighbourhood composition determines growth, architecture and  
239 herbivory in tropical rain forest tree seedlings. *J. Ecol.* **94**, 646-655. (doi:10.1111/j.1365-2745.2006.01127.x).

- 240 [110] Fine, PVA, Miller, ZJ, Mesones, I, Irazuzta, S, Appel, HM, Stevens, MHH, Saaksjarvi, I, Schultz, LC & Coley, PD. 2006  
241 The growth-defense trade-off and habitat specialization by plants in Amazonian forests. *Ecology* **87**, S150-S162.
- 242 [111] Fox, LR. 1983 Estimates of damage by herbivorous insects on *Eucalyptus* trees. *Aust. J. Ecol.* **8**, 139-147.
- 243 [112] Casotti, G & Bradley, JS. 1991 Leaf nitrogen and its effects on the rate of herbivory on selected eucalypts in the jarrah  
244 forest. *For. Ecol. Manage.* **41**, 167-177.
- 245 [113] Radho-Toly, S, Majer, JD & Yates, AC. 2001 Impact of fire on leaf nutrients, arthropod fauna and herbivory of native and  
246 exotic eucalypts in Kings Park, Perth, Western Australia. *Austral Ecol.* **26**, 500-506.
- 247 [114] Abbott, I, Van Heurck, P, Burbidge, T & Williams, M. 1993 Damage caused by insects and fungi to eucalypt foliage:  
248 spatial and temporal patterns in Mediterranean forest of Western Australia. *For. Ecol. Manage.* **58**, 85-110.
- 249 [115] Ohmart, CP, Stewart, LG & Thomas, JR. 1983 Leaf consumption by insects in three *Eucalyptus* forest types in  
250 southeastern Australia and their role in short-term nutrient cycling. *Oecologia* **59**, 322-330.
- 251 [116] Loch, AD & Matsuki, M. 2010 Effects of defoliation by *Eucalyptus* weevil, *Gonipterus scutellatus*, and chrysomelid  
252 beetles on growth of *Eucalyptus globulus* in southwestern Australia. *For. Ecol. Manage.* **260**, 1324-1332.  
253 (doi:10.1016/j.foreco.2010.07.025).
- 254 [117] Yamasaki, M & Kikuzawa, K. 2003 Temporal and spatial variations in leaf herbivory within a canopy of *Fagus crenata*.  
255 *Oecologia* **137**, 226-232. (doi:10.1007/s00442-003-1337-x).

- 256 [118] Nielsen, BO. 1978 Above ground food resources and herbivory in a beech forest ecosystem. *Oikos* **31**, 273-279.
- 257 [119] Phillipson, J & Thompson, DJ. 1983 Phenology and intensity of phyllophage attack on *Fagus sylvatica* in Wytham Woods,  
258 Oxford. *Ecol. Entomol.* **8**, 315-330.
- 259 [120] Herbert Jr, DA, Mack, TP, Backman, PA & Rodriguez-Kabana, R. 1992 Validation of a model for estimating leaf-feeding  
260 by insects in soybean. *Crop Protect.* **11**, 27-34.
- 261 [121] Rypstra, AL & Marshall, SD. 2005 Augmentation of soil detritus affects the spider community and herbivory in a soybean  
262 agroecosystem. *Entomol. Exp. Appl.* **116**, 149-157. (doi:10.1111/j.1570-7458.2005.00322.x).
- 263 [122] Rudgers, JA. 2004 Enemies of herbivores can shape plant traits: selection in a facultative ant-plant mutualism. *Ecology* **85**,  
264 192-205.
- 265 [123] Marquis, RJ & Clark, DB. 1989 Habitat and fertilization effects on leaf herbivory in *Hampea appendiculata* (Malvaceae):  
266 implications for tropical firewood systems. *Agric. Ecosyst. Environ.* **25**, 165-174.
- 267 [124] Cuevas-Reyes, P, Oyama, K, González-Rodríguez, A, Fernandes, GW & Mendoza-Cuenca, L. 2011 Contrasting herbivory  
268 patterns and leaf fluctuating asymmetry in *Heliocarpus pallidus* between different habitat types within a Mexican tropical dry  
269 forest. *J. Trop. Ecol.* **27**, 383-391. (doi:10.1017/s026646741100006x).
- 270 [125] Fáveri, SB, Vasconcelos, HL & Dirzo, R. 2008 Effects of Amazonian forest fragmentation on the interaction between  
271 plants, insect herbivores, and their natural enemies. *J. Trop. Ecol.* **24**, 57-64. (doi:10.1017/s0266467407004592).

- 272 [126] Eichhorn, MP, Compton, SG & Hartley, SE. 2006 Seedling species determines rates of leaf herbivory in a Malaysian rain  
273 forest. *J. Trop. Ecol.* **22**, 513-519. (doi:10.1017/s026646740600335x).
- 274 [127] Kursar, TA, Wolfe, BT, Epps, MJ & Coley, PD. 2006 Food quality, competition, and parasitism influence feeding  
275 preference in a neotropical lepidopteran. *Ecology* **87**, 3058-3069. (doi:10.1890/0012-9658(2006)87[3058:fqcapi]2.0.co;2).
- 276 [128] Coley, PD, Lokvam, J, Rudolph, K, Bromberg, K, Sackett, TE, Wright, L, Brenes-Arguedas, T, Dvoretz, D, Ring, S, Clark,  
277 A, et al. 2005 Divergent defensive strategies of young leaves in two species of *Inga*. *Ecology* **86**, 2633-2643.
- 278 [129] Korndörfer, AP & Del-Claro, K. 2006 Ant defense versus induced defense in *Lafoensia pacari* (Lythraceae), a  
279 myrmecophilous tree of the Brazilian Cerrado. *Biotropica* **38**, 786-788. (doi:10.1111/j.1744-7429.2006.00200.x).
- 280 [130] Thomsen, CJM. Table S1.
- 281 [131] Gaume, L, McKey, D & Anstett, MC. 1997 Benefits conferred by 'timid' ants: active anti-herbivore protection of the  
282 rainforest tree *Leonardoxa africana* by the minute ant *Petalomyrmex phylax*. *Oecologia* **112**, 209-216.  
283 (doi:10.1007/s004420050302).
- 284 [132] Lau, JA, Strengbom, J, Stone, LR, Reich, PB & Tiffin, P. 2008 Direct and indirect effects of CO<sub>2</sub>, nitrogen, and  
285 community diversity on plant-enemy interactions. *Ecology* **89**, 226-236. (doi:10.1890/07-0423.1).
- 286 [133] Reichle, DE, Goldstein, RI, Van Heek, RIJ & Dodson, GJ. 1973 Analysis of insect consumption in forest canopy. *Ecology*  
287 **54**, 1076-1084.

- 288 [134] Rudgers, JA & Hoeksema, JD. 2003 Inter-annual variation in above- and belowground herbivory on a native, annual  
289 legume. *Plant Ecol.* **169**, 105-120. (doi:10.1023/a:1026221602968).
- 290 [135] Fiala, B, Maschwitz, U, Pong, TY & Helbig, AJ. 1989 Studies of a South East Asian ant-plant association: protection of  
291 *Macaranga* trees by *Crematogaster borneensis*. *Oecologia* **79**, 463-470. (doi:10.1007/bf00378662).
- 292 [136] Vasconcelos, HL & Davidson, DW. 2000 Relationship between plant size and ant associates in two Amazonian ant-plants.  
293 *Biotropica* **32**, 100-111.
- 294 [137] García-Guzmán, G & Benítez-Malvido, J. 2003 Effect of litter on the incidence of leaf-fungal pathogens and herbivory in  
295 seedlings of the tropical tree *Nectandra ambigens*. *J. Trop. Ecol.* **19**, 171-177. (doi:10.1017/s0266467403003195).
- 296 [138] Garibaldi, LA, Kitzberger, T & Chaneton, EJ. 2011 Environmental and genetic control of insect abundance and herbivory  
297 along a forest elevational gradient. *Oecologia* **167**, 117-129. (doi:10.1007/s00442-011-1978-0).
- 298 [139] Garibaldi, LA, Kitzberger, T, Noemí Mazía, C & Chaneton, EJ. 2010 Nutrient supply and bird predation additively control  
299 insect herbivory and tree growth in two contrasting forest habitats. *Oikos* **119**, 337-349. (doi:10.1111/j.1600-  
300 0706.2009.17862.x).
- 301 [140] Kouki, J. 1991 Small-scale distributional dynamics of the yellow water-lily and its herbivore *Galerucella nymphaeae*  
302 (Coleoptera, Chrysomelidae). *Oecologia* **88**, 48-54.



- 303 [141] Kerguelen, V & Hoddle, MS. 2000 Comparison of the susceptibility of several cultivars of avocado to the perseia mite,  
304 *Oligonychus perseae* (Acari: Tetranychidae). *Scientia Horticulturae* **84**, 101-114. (doi:10.1016/s0304-4238(99)00103-x).
- 305 [142] Alcalá, RE, Mariano, NA, Osuna, F & Abarca, CA. 2010 An experimental test of the defensive role of sticky traps in the  
306 carnivorous plant *Pinguicula moranensis* (Lentibulariaceae). *Oikos* **119**, 891-895. (doi:10.1111/j.1600-0706.2009.18110.x).
- 307 [143] Marquis, RJ. 1984 Leaf herbivores decrease fitness of a tropical plant. *Science* **226**, 537-539.
- 308 [144] Dyer, LA & Letourneau, DK. 1999 Relative strengths of top-down and bottom-up forces in a tropical forest community.  
309 *Oecologia* **119**, 265-274. (doi:10.1007/s004420050785).
- 310 [145] Mehltreter, K, Hülber, K & Hietz, P. 2006 Herbivory on epiphytic ferns of a Mexican cloud forest. *Fern Gazette* **17**, 303-  
311 309.
- 312 [146] Wagner, D, DeFoliart, L, Doak, P & Schneiderheinze, J. 2008 Impact of epidermal leaf mining by the aspen leaf miner  
313 (*Phyllocnistis populiella*) on the growth, physiology, and leaf longevity of quaking aspen. *Oecologia* **157**, 259-267.  
314 (doi:10.1007/s00442-008-1067-1).
- 315 [147] Cebrián, J, Duarte, CM, Marbà, N, Enríquez, S, Gallegos, M & Olesen, B. 1996 Herbivory on *Posidonia oceanica*:  
316 magnitude and variability in the Spanish Mediterranean. *Mar. Ecol. Prog. Ser.* **130**, 147-155.
- 317 [148] Lienert, J & Fischer, M. 2003 Habitat fragmentation affects the common wetland specialist *Primula farinosa* in north-east  
318 Switzerland. *J. Ecol.* **91**, 587-599. (doi:10.1046/j.1365-2745.2003.00793.x).

- 319 [149] Gonçalves-Alvim, SJ, Lana, TC, Ranieri, BD & Fernandes, GW. 2011 Test of hypotheses about herbivory and chemical  
320 defences of *Qualea parviflora* (Vochysiaceae) in Brazilian Cerrado. *Rev. Bras. Bot.* **34**, 223-230. (doi:10.1590/s0100-  
321 84042011000200009).
- 322 [150] Barber, NA & Marquis, RJ. 2011 Light environment and the impacts of foliage quality on herbivorous insect attack and  
323 bird predation. *Oecologia* **166**, 401-409. (doi:10.1007/s00442-010-1840-9).
- 324 [151] Adams, AS & Rieske, LK. 2001 Herbivory and fire influence white oak (*Quercus alba* L.) seedling vigor. *For. Sci.* **47**,  
325 331-337.
- 326 [152] Marquis, RJ & Whelan, CJ. 1994 Insectivorous birds increase growth of white oak through consumption of leaf-chewing  
327 insects. *Ecology* **75**, 2007-2014.
- 328 [153] Forkner, RE & Hunter, MD. 2000 What goes up must come down? Nutrient addition and predation pressure on oak  
329 herbivores. *Ecology* **81**, 1588-1600.
- 330 [154] Linit, MJ, Johnson, PS, McKinney, RA & Kearby, WH. 1986 Insects and leaf area losses of planted northern red oak  
331 seedlings in an Ozark forest. *For. Sci.* **32**, 11-20.
- 332 [155] Zehnder, CB, Stodola, KW, Cooper, RJ & Hunter, MD. 2010 Spatial heterogeneity in the relative impacts of foliar quality  
333 and predation pressure on red oak, *Quercus rubra*, arthropod communities. *Oecologia* **164**, 1017-1027. (doi:10.1007/s00442-  
334 010-1750-x).

- 335 [156] Agrawal, AA. 1999 Induced responses to herbivory in wild radish: effects on several herbivores and plant fitness. *Ecology*  
336 **80**, 1713-1723.
- 337 [157] Offenberg, J, Nielsen, MG, Macintosh, DJ, Havanon, S & Aksornkoae, S. 2005 Lack of ant attendance may induce  
338 compensatory plant growth. *Oikos* **111**, 170-178. (doi:10.1111/j.0030-1299.2005.13604.x).
- 339 [158] Offenberg, J, Havanon, S, Aksornkoae, S, MacIntosh, DJ & Nielsen, MG. 2004 Observations on the ecology of weaver  
340 ants (*Oecophylla smaragdina* Fabricius) in a Thai mangrove ecosystem and their effect on herbivory of *Rhizophora*  
341 *mucronata* Lam. *Biotropica* **36**, 344-351.
- 342 [159] Hargrove, WW, Crossley D.A, J & Seastedt, TR. 1984 Shifts in insect herbivory in the canopy of black locust, *Robinia*  
343 *pseudacacia*, after fertilization. *Oikos* **43**, 322-328.
- 344 [160] Ågren, J. 1987 Intersexual differences in phenology and damage by herbivores and pathogens in dioecious *Rubus*  
345 *chamaemorus* L. *Oecologia* **72**, 161-169. (doi:10.1007/bf00379262).
- 346 [161] Scherber, C, Milcu, A, Partsch, S, Scheu, S & Weisser, WW. 2006 The effects of plant diversity and insect herbivory on  
347 performance of individual plant species in experimental grassland. *J. Ecol.* **94**, 922-931. (doi:10.1111/j.1365-  
348 2745.2006.01144.x).

- 349 [162] Nakamura, M, Kagata, H & Ohgushi, T. 2006 Trunk cutting initiates bottom-up cascades in a tri-trophic system: sprouting  
350 increases biodiversity of herbivorous and predaceous arthropods on willows. *Oikos* **113**, 259-268. (doi:10.1111/j.2006.0030-  
351 1299.14251.x).
- 352 [163] Kudo, G. 2003 Variations in leaf traits and susceptibility to insect herbivory within a *Salix miyabeana* population under  
353 field conditions. *Plant Ecol.* **169**, 61-69. (doi:10.1023/a:1026209017627).
- 354 [164] Sipura, M. 1999 Tritrophic interactions: willows, herbivorous insects and insectivorous birds. *Oecologia* **121**, 537-545.  
355 (doi:10.1007/s004420050960).
- 356 [165] Sipura, M. 2002 Contrasting effects of ants on the herbivory and growth of two willow species. *Ecology* **83**, 2680-2690.
- 357 [166] Hjältén, J, Niemi, L, Wennström, A, Ericson, L, Roininen, H & Julkunen-Tiitto, R. 2007 Variable responses of natural  
358 enemies to *Salix triandra* phenotypes with different secondary chemistry. *Oikos* **116**, 751-758. (doi:10.1111/j.2007.0030-  
359 1299.15365.x).
- 360 [167] Pyšek, P. 1992 Seasonal changes in response of *Senecio ovatus* to grazing by the chrysomelid beetle *Chrysomela*  
361 *speciosissima*. *Oecologia* **91**, 596-628. (doi:10.1007/bf00650336).
- 362 [168] Norghauer, JM, Malcolm, JR & Zimmerman, BL. 2006 Juvenile mortality and attacks by a specialist herbivore increase  
363 with conspecific adult basal area of Amazonian *Swietenia macrophylla* (Meliaceae). *J. Trop. Ecol.* **22**, 451-460.  
364 (doi:10.1017/s0266467406003257).

- 365 [169] Norghauer, JM, Malcolm, JR, Zimmerman, BL & Felfili, JM. 2008 Experimental establishment of big-leaf mahogany  
366 (*Swietenia macrophylla* King) seedlings on two soil types in native forest of Pará, Brazil. *For. Ecol. Manage.* **255**, 282-291.  
367 (doi:10.1016/j.foreco.2007.09.049).
- 368 [170] Ermolaev, IV & Sidorova, OV. 2011 Seasonal dynamics of damage to small-leaved lime trees by phyllophagous  
369 arthropods. *Entomol. Rev.* **91**, 585-591. (doi:10.1134/s0013873811050034).
- 370 [171] Knight, TM, Caswell, H & Kalisz, S. 2009 Population growth rate of a common understory herb decreases non-linearly  
371 across a gradient of deer herbivory. *For. Ecol. Manage.* **257**, 1095-1103. (doi:10.1016/j.foreco.2008.11.018).
- 372 [172] Lawson, AB & Dahlsten, DL. 2003 Evaluation of systemic insecticides as a treatment option in integrated pest  
373 management of the elm leaf beetle, *Xanthogaleruca luteola* (Müller) (Coleoptera: Chrysomelidae). *J. Econ. Entomol.* **96**,  
374 1455-1462.
- 375 [173] Richardson, SJ, Press, MC, Parsons, AN & Hartley, SE. 2002 How do nutrients and warming impact on plant communities  
376 and their insect herbivores? A 9-year study from a sub-Arctic heath. *J. Ecol.* **90**, 544-556. (doi:10.1046/j.1365-  
377 2745.2002.00681.x).
- 378 [174] Schmidt, G & Zotz, G. 2000 Herbivory in the epiphyte, *Vriesea sanguinolenta* Cogn. & Marchal (Bromeliaceae). *J. Trop.*  
379 *Ecol.* **16**, 829-839. (doi:10.1017/s0266467400001747).
- 380
