# Supplementary material
Source: PubMed Central journal article supplement (PMC4071545)
Supplement: rspb20140555supp3.pdf [file rspb20140555supp3.pdf]

#NEXUS  
[R-package APE, Fri Apr 25 13:05:41 2014]

```
BEGIN TAXA;  
  DIMENSIONS NTAX = 1058;  
  TAXLABELS  
    Picea_abies  
    Picea_mariana  
    Picea_rubens  
    Picea_glauca  
    Pinus_strobus  
    Pinus_banksiana  
    Pinus_resinosa  
    Larix_americana  
    Larix_laricina  
    Pseudotsuga_menziesii  
    Tsuga_canadensis  
    Tsuga_heterophylla  
    Abies_balsamea  
    Abies_grandis  
    Taxus_brevifolia  
    Taxus_canadensis  
    Juniperus_communis  
    Thuja_occidentalis  
    Thuja_plicata  
    Nymphaea_odorata  
    Nuphar_variegatum  
    Nuphar_lutea  
    Brasenia_schreberi  
    Asarum_canadense  
    Piper_stipulaceum  
    Piper_arieianum  
    Piper_reticulatum  
    Piper_aduncum  
    Piper_cenocladum  
    Otoba_glycycarpa  
    Liriodendron_tulipifera  
    Annona_spraguei  
    Anaxagorea_dolichocarpa  
    Oxandra_panamensis  
    Oxandra_asbeckii  
    Uvariopsis_congensis  
    Asimina_incana  
    Cymbopetalum_baillonii  
    Guatteria_conspicua  
    Virola_calophylla  
    Lindera_benzoin  
    Actinodaphne_spp.  
    Persea_americana  
    Neolitsea_aurata  
    Nectandra_ambigens  
    Cinnamomum_verum  
    Cinnamomum_spp.  
    Cinnamomum_camphora  
    Cinnamomum_subavenium  
    Machilus_thunbergii  
    Phoebe_cinnamomifolia  
    Gyrocarpus_jatrophifolius  
    Wilkiea_huegeliana  
    Doryphora_sassafras  
    Heliconia_metallica  
    Heliconia_catheta  
    Calathea_ovandensis  
    Calathea_latifolia  
    Calathea_cleistantha  
    Pleiostachya_pruinosa  
    Marantochloa_leucantha  
    Stachyphrynium_griffithii
```

Costus\_villosissimus  
Costus\_spp.  
Pleuranthodium\_racemigerum  
Alpinia\_modesta  
Alpinia\_caerulea  
Alpinia\_arctiflora  
Aframomum\_mildbraedii  
Aframomum\_cf.  
Renealmia\_pluriplicata  
Costus\_spicatus  
Musa\_paradisiaca  
Heliconia\_irrasa  
Palisota\_mannii  
Polliia\_condensata  
Hanguana\_malayana  
Pontederia\_cordata  
Leptaspis\_zeilanica  
Agropyron\_trachycaulum  
Pharus\_latifolius  
Rhipidocladum\_racemiflorum  
Chusquea\_simpliciflora  
Brachypodium\_sylvaticum  
Hordeum\_vulgare  
Bromus\_kalmii  
Bromus\_hordeaceus  
Bromus\_inermis  
Bromus\_erectus  
Elymus\_canadensis  
Elymus\_glaucus  
Elymus\_repens  
Deschampsia\_nubigena  
Phleum\_pratense  
Alopecurus\_pratensis  
Helictotrichon\_pubescens  
Poa\_pratensis  
Poa\_trivialis  
Festuca\_campestris  
Festuca\_altaica  
Festuca\_rubra  
Lolium\_multiflorum  
Festuca\_pratensis  
Holcus\_lanatus  
Dactylis\_glomerata  
Anthoxanthum\_odoratum  
Trisetum\_flavescens  
Arrhenatherum\_elatius  
Isachne\_distichophylla  
Phragmites\_australis  
Panicum\_lanuginosum  
Melinis\_repens  
Panicum\_capillare  
Microstegium\_vimineum  
Sorghum\_bicolor  
Andropogon\_bladhii  
Andropogon\_gerardii  
Heteropogon\_contortus  
Paspalum\_urvillei  
Spartina\_alterniflora  
Eragrostis\_variabilis  
Microlaena\_stipoides  
Carex\_consimilis  
Carex\_plantaginea  
Juncus\_roemerianus  
Juncus\_mertensianus  
Juncus\_gerardii  
Luzula\_campestris  
Catopsis\_sessiliflora  
Vriesea\_sanguinolenta

Tillandsia\_deppeana  
Tillandsia\_multicaulis  
Tillandsia\_junceae  
Tillandsia\_punctulata  
Desmoncus\_orthacanthos  
Astrocaryum\_mexicanum  
Geonoma\_congesta  
Chamaedorea\_spp.  
Chamaedorea\_pinnatifrons  
Chamaedorea\_ernesti\_augusti  
Chamaedorea\_alternans  
Calamus\_muelleri  
Calamus\_caryotoides  
Calamus\_australis  
Livistona\_australis  
Welfia\_regia  
Jacquiniella\_teretifolia  
Jacquiniella\_leucomelana  
Astelia\_menziesiana  
Molineria\_latifolia  
Yucca\_filamentosa  
Cordylina\_cannifolia  
Dracaena\_laxissima  
Dracaena\_fragrans  
Maianthemum\_stellatum  
Iris\_missouriensis  
Crocasmia\_pottsii  
Trimezia\_martinicensis  
Lycaste\_aromatica  
Trillium\_erectum  
Trillium\_grandiflorum  
Freycinetia\_spp.  
Freycinetia\_excelsa  
Asplundia\_uncinata  
Cyclanthus\_bipartitus  
Tacca\_integrifolia  
Culcasia\_falcifolia  
Pothos\_longipes  
Spathiphyllum\_fulvovirens  
Schismatoglottis\_wallichii  
Alocasia\_brisbanensis  
Posidonia\_oceanica  
Sagittaria\_latifolia  
Berberis\_repens  
Thalictrum\_fendleri  
Aquilegia\_coerulea  
Aquilegia\_canadensis  
Thalictrum\_dioicum  
Delphinium\_nelsonii  
Delphinium\_barbeyi  
Anemone\_cylindrica  
Hepatica\_nobilis  
Ranunculus\_repens  
Ranunculus\_acris  
Berberis\_thunbergii  
Abuta\_panamensis  
Sanguinaria\_canadensis  
Platanus\_occidentalis  
Banksia\_serrata  
Banksia\_oblongifolia  
Hakea\_teretifolia  
Hakea\_gibbosa  
Hakea\_dactyloides  
Grevillea\_speciosa  
Grevillea\_sericea  
Grevillea\_buxifolia  
Banksia\_ericifolia  
Xylomelum\_pyriforme

Isopogon\_anethifolius  
Oreocallis\_sp.  
Meliosma\_oldhamii  
Gunnera\_mexicana  
Tetracera\_spp.  
Hibbertia\_obtusifolia  
Hibbertia\_linearis  
Hibbertia\_dentata  
Doliocarpus\_major  
Sabatia\_angularis  
Strychnos\_tabascanensis  
Strychnos\_mitis  
Bonafousia\_undulata  
Barjonia\_erecta  
Cascabela\_ovata  
Plumeria\_rubra  
Funtumia\_latifolia  
Apocynum\_cannabinum  
Vincetoxicum\_rossicum  
Asclepias\_curassavica  
Asclepias\_incarinata  
Asclepias\_syriaca  
Stemmadenia\_donnellsmithii  
Lacmellea\_panamensis  
Aspidosperma\_tomentosum  
Gentiana\_parryi  
Borreria\_spp.  
Coussarea\_curvigemma  
Faramea\_occidentalis  
Coprosma\_quadrifolia  
Spermacoce\_assurgens  
Galium\_biflorum  
Galium\_boreale  
Galium\_verum  
Galium\_mollugo  
Psychotria\_simiarum  
Psychotria\_marginata  
Psychotria\_glomerulata  
Psychotria\_furcata  
Psychotria\_faxlucens  
Psychotria\_acuminata  
Psychotria\_horizontalis  
Palicourea\_rigida  
Sabicea\_brasiliensis  
Coffea\_canephora  
Coffea\_arabica  
Tocoyena\_pittieri  
Randia\_spinosa  
Crossopteryx\_febrifuga  
Scyphiphora\_hydrophyllacea  
Alseis\_blackiana  
Calycophyllum\_spruceanum  
Cinchona\_pubescens  
Guettarda\_elliptica  
Chomelia\_ribesioides  
Hamelia\_longipes  
Mitragnya\_inermis  
Sarcocephalus\_latifolia  
Phryganocydia\_corymbosa  
Spathodea\_campanulata  
Markhamia\_platycalyx  
Catalpa\_speciosa  
Arrabidaea\_candicans  
Arrabidaea\_patellifera  
Pandorea\_pandorana  
Tabebuia\_rosea  
Pinguicula\_moranensis  
Schaueria\_calycobractea

Avicennia\_rumphiana  
Avicennia\_officinalis  
Avicennia\_marina  
Avicennia\_germinans  
Aphelandra\_aurantiaca  
Acanthus\_ilicifolius  
Stachytarpheta\_jamaicensis  
Lantana\_camara  
Lippia\_graveolens  
Castilleja\_sulphurea  
Mimulus\_ringens  
Vitex\_hemsleyi  
Gmelina\_spp.  
Premna\_angolensis  
Betonica\_officinalis  
Prostanthera\_denticulata  
Prunella\_vulgaris  
Agastache\_urticifolia  
Glechoma\_hederacea  
Hyptis\_saxatilis  
Monarda\_fistulosa  
Verbascum\_thapsus  
Veronica\_chamaedrys  
Plantago\_rugellii  
Plantago\_hawaiensis  
Plantago\_lanceolata  
Plantago\_media  
Plantago\_major  
Linaria\_vulgaris  
Chrysothemis\_pulchella  
Olea\_welwitschii  
Olea\_europaea  
Fraxinus\_pennsylvanica  
Nestegis\_sandwicensis  
Ligustrum\_vulgare  
Ipomoea\_wolcottiana  
Ipomoea\_spp.  
Ipomoea\_hederacea  
Bonamia\_maripoides  
Ipomoea\_purpurea  
Nothoecstrum\_brevifolia  
Cestrum\_panamense  
Nicotiana\_glauca  
Solanum\_umbellatum  
Solanum\_spp.  
Solanum\_ptychanthum  
Solanum\_dulcamara  
Datura\_stramonium  
Solanum\_carolinense  
Mertensia\_paniculata  
Mertensia\_ciliata  
Cordia\_elaeagnoides  
Cordia\_alliodora  
Viguiera\_multiflora  
Helianthella\_quinquenervis  
Dubautia\_scabra  
Arnica\_montana  
Argyroxiphium\_kauense  
Cirsium\_parryi  
Cirsium\_oleraceum  
Carduus\_nutans  
Cirsium\_arvense  
Bellis\_perennis  
Solidago\_rigida  
Solidago\_missouriensis  
Solidago\_altissima  
Solidago\_gigantea  
Solidago\_canadensis

Solidago\_sempervirens  
Aster\_novae\_angliae  
Euthamia\_graminifolia  
Erigeron\_strigosus  
Erigeron\_speciosus  
Erigeron\_annuus  
Conyza\_canadensis  
Pseudognaphalium\_sandwicense  
Bidens\_pilosa  
Ageratina\_riparia  
Clibadium\_sp.  
Mikania\_leiostachya  
Ambrosia\_artemisiifolia  
Baccharis\_pilularis  
Baccharis\_halimifolia  
Iva\_frutescens  
Borrchia\_frutescens  
Centaurea\_jacea  
Senecio\_pauperculus  
Senecio\_ovatus  
Tussilago\_farfara  
Senecio\_vulgaris  
Lactuca\_ludoviciana  
Cichorium\_intybus  
Hypochaeris\_radicata  
Scorzoneroides\_autumnalis  
Leontodon\_autumnalis  
Achillea\_millefolium  
Leucanthemum\_vulagre  
Artemisia\_norvegica  
Artemisia\_ludoviciana  
Artemisia\_biennis  
Artemisia\_campestris  
Leucanthemum\_vulgare  
Lactuca\_serriola  
Lactuca\_canadensis  
Crepis\_biennis  
Taraxacum\_officinale  
Tragopogon\_dubius  
Tragopogon\_pratensis  
Cuttsia\_viburnea  
Laurentia\_longiflora  
Lobelia\_cardinalis  
Campanula\_americanum  
Campanula\_rotundifolia  
Campanula\_rapunculoides  
Xanthosia\_pilosa  
Daucus\_carota  
Anthriscus\_sylvestris  
Pimpinella\_saxifraga  
Aegopodium\_podagraria  
Heracleum\_sphondylium  
Pastinaca\_sativa  
Carum\_carvi  
Polyscias\_murrayi  
Polyscias\_fulva  
Dendropanax\_umbellatus  
Lonicera\_xylosteum  
Lonicera\_morrowi  
Lonicera\_involucrata  
Lonicera\_japonica  
Knautia\_arvensis  
Valeriana\_edulis  
Viburnum\_acerifolium  
Viburnum\_lantana  
Sphenostemon\_papuanum  
Polyosma\_cunninghamii  
Quintinia\_sieberi

Ilex\_paraguariensis  
Symplocos\_stellaris  
Leucopogon\_esquamatus  
Epacris\_tubiflora  
Leucopogon\_microphyllus  
Vaccinium\_vitis\_idaea  
Vaccinium\_myrtillus  
Vaccinium\_uliginosum  
Kalmia\_latifolia  
Arctostaphylos\_uva\_ursi  
Schima\_superba  
Camellia\_fraterna  
Camellia\_sinensis  
Eurya\_rubiginosa  
Chrysophyllum\_spp.  
Chrysophyllum\_pomiferum  
Micropholis\_trunciflora  
Micropholis\_egensis  
Micropholis\_cayennensis  
Micropholis\_brochidodroma  
Pouteria\_stipitata  
Pouteria\_peruviensis  
Pouteria\_firma  
Pouteria\_cuspidata  
Pouteria\_caimito  
Manilkara\_bidentata  
Pouteria\_reticulata  
Micropholis\_venulosa  
Micropholis\_guyanensis  
Mimusops\_bagshawei  
Chrysophyllum\_cainito  
Ardisia\_spp.  
Aegiceras\_corniculatum  
Primula\_farinosa  
Primula\_veris  
Ardisia\_crenata  
Diospyros\_abyssinica  
Diospyros\_virginiana  
Eurya\_muricata  
Polemonium\_foliosissimum  
Phlox\_drummondii  
Ipomopsis\_aggregata  
Couratari\_calycina  
Lecythis\_poiteaui  
Impatiens\_capensis  
Cornus\_alternifolia  
Cornus\_sanguinea  
Cornus\_florida  
Aegialitis\_annulata  
Polygonum\_viviparum  
Polygonum\_cuspidatum  
Rumex\_hastatulus  
Rumex\_densiflorus  
Rumex\_acetosa  
Rumex\_acetosella  
Coccoloba\_barbadensis  
Ruprechtia\_fusca  
Eriogonum\_umbellatum  
Eriogonum\_tomentosum  
Triplaris\_cumingiana  
Coccoloba\_uvifera  
Phytolacca\_rivinoides  
Guapira\_spp.  
Guapira\_macrocarpa  
Phytolacca\_americana  
Chenopodium\_simplex  
Chenopodium\_album  
Amaranthus\_hypochondriacus

Cerastium\_arvense  
Cerastium\_fontanum  
Silene\_antirrhina  
Silene\_latifolia  
Silene\_vulgaris  
Achatocarpus\_gracilis  
Strombosia\_scheffleri  
Aextoxicon\_punctatum  
Liquidambar\_styraciflua  
Loropetalum\_chinense  
Daphniphyllum\_oldhamii  
Ribes\_cereum  
Heuchera\_parvifolia  
Vitis\_tiliifolia  
Cissus\_hypoglauca  
Vitis\_riparia  
Cochlospermum\_vitifolium  
Parashorea\_tomentella  
Parashorea\_spp.  
Parashorea\_malaanonan  
Monotes\_kerstingii  
Dryobalanops\_lanceolata  
Anisoptera\_thurifera  
Shorea\_spp.  
Shorea\_parvifolia  
Shorea\_multiflora  
Shorea\_leprosula  
Shorea\_johorensis  
Shorea\_glaucescens  
Shorea\_gibbosa  
Shorea\_fallax  
Shorea\_acuminatissima  
Hopea\_nervosa  
Hopea\_beccariana  
Robinsonella\_mirandae  
Pachira\_insignis  
Pachira\_flaviflora  
Pachira\_brevipes  
Theobroma\_cacao  
Heritiera\_littoralis  
Ceiba\_grandiflora  
Ceiba\_aesculifolia  
Ceiba\_pentandra  
Eriotheca\_sp.  
Eriotheca\_globosa  
Eriotheca\_longitubulosa  
Pachira\_aquatica  
Brachychiton\_acerifolius  
Cola\_nitida  
Tilia\_cordata  
Abutilon\_theophrasti  
Pavonia\_rosa\_campestris  
Gossypium\_thurberi  
Hampea\_appendiculata  
Tilia\_americana  
Lasiopetalum\_ferrugineum  
Helioarpus\_pallidus  
Helioarpus\_appendiculatus  
Luehea\_seemannii  
Pachira\_quinata  
Pimelea\_linifolia  
Daphne\_laureola  
Gonystylus\_spp.  
Raphanus\_raphanistrum  
Alliaria\_petiolata  
Thlaspi\_arvense  
Lepidium\_campestre  
Capsella\_bursa\_pastoris



Arabidopsis\_lyrata  
Lepidium\_densiflorum  
Arabidopsis\_thaliana  
Raphanus\_sativus  
Brassica\_oleracea  
Carica\_papaya  
Thinouia\_tomocarpa  
Elattostachys\_nervosa  
Acer\_saccharinum  
Acer\_pensylvanicum  
Acer\_pseudoplatanus  
Acer\_rubrum  
Acer\_platanoides  
Acer\_oblongum  
Acer\_saccharum  
Acer\_glabrum  
Acer\_negundo  
Dodonaea\_triquetra  
Dodonaea\_viscosa  
Paullinia\_spp.  
Paullinia\_sessiliflora  
Paullinia\_cururu  
Thouinia\_paucidentata  
Allophylus\_campostachys  
Mischocarpus\_spp.  
Vouarana\_guianensis  
Cupania\_dentata  
Trichilia\_trifolia  
Synoum\_glandulosum  
Aglaiia\_mackiana  
Guarea\_glabra  
Xylocarpus\_mekongensis  
Xylocarpus\_australasicus  
Xylocarpus\_granatum  
Xylocarpus\_moluccensis  
Swietenia\_macrophylla  
Toona\_ciliata  
Toona\_australis  
Cedrela\_odorata  
Zieria\_pilosa  
Zieria\_laevigata  
Philothea\_salsolifolia  
Crowea\_saligna  
Boronia\_ledifolia  
Eriostemon\_australasius  
Citrus\_sinensis  
Citrus\_reticulata  
Tapirira\_guianensis  
Spondias\_mombin  
Anacardium\_excelsum  
Rhus\_radicans  
Rhus\_glabra  
Schinus\_terebinthifolius  
Rhus\_typhina  
Spondias\_radlkoferi  
Bursera\_instabilis  
Bursera\_heteresthes  
Bursera\_excelsa  
Bursera\_simaruba  
Dacryodes\_excelsa  
Tetragastris\_panamensis  
Protium\_trifoliolatum  
Protium\_subserratum  
Protium\_spruceanum  
Protium\_paniculatum  
Protium\_pallidum  
Protium\_nodulosum  
Protium\_laxiflorum

Protium\_krukoffii  
Protium\_heptaphyllum  
Protium\_hebetatum  
Protium\_giganteum  
Protium\_gallosum  
Protium\_decandrum  
Protium\_calanense  
Protium\_aracouchini  
Protium\_tenuifolium  
Protium\_sagotianum  
Protium\_opacum  
Syzygium\_spp.  
Syncarpia\_glomulifera  
Osbornia\_octodonta  
Eugenia\_spp.  
Eugenia\_ochneocarpa  
Darwinia\_fascicularis  
Syzygium\_jambos  
Metrosideros\_polymorpha  
Angophora\_floribunda  
Angophora\_hispida  
Psidium\_sartorianum  
Psidium\_cattleianum  
Pimenta\_racemosa  
Psidium\_guajava  
Eucalyptus\_youmanii  
Eucalyptus\_wandoo  
Eucalyptus\_viminalis  
Eucalyptus\_umbra  
Eucalyptus\_triflora  
Eucalyptus\_tereticornis  
Eucalyptus\_stellulata  
Eucalyptus\_st  
Eucalyptus\_sieberi  
Eucalyptus\_sideroxylon  
Eucalyptus\_sclerophylla  
Eucalyptus\_rudis  
Eucalyptus\_rubida  
Eucalyptus\_rossii  
Eucalyptus\_resinifera  
Eucalyptus\_radiata  
Eucalyptus\_racemosa  
Eucalyptus\_pulverulenta  
Eucalyptus\_polyanthemos  
Eucalyptus\_pilularis  
Eucalyptus\_perriniana  
Eucalyptus\_pauciflora  
Eucalyptus\_patens  
Eucalyptus\_obtusiflora  
Eucalyptus\_obliqua  
Eucalyptus\_nova\_anglica  
Eucalyptus\_molluccana  
Eucalyptus\_microcorys  
Eucalyptus\_megacarpa  
Eucalyptus\_marginata  
Eucalyptus\_mannifera  
Eucalyptus\_macrorhyncha  
Eucalyptus\_haemastoma  
Eucalyptus\_gummifera  
Eucalyptus\_gullickii  
Eucalyptus\_griffithsii  
Eucalyptus\_gomphocephala  
Eucalyptus\_foecunda  
Eucalyptus\_fibrosa  
Eucalyptus\_fastigata  
Eucalyptus\_elata  
Eucalyptus\_drummondii  
Eucalyptus\_dives

Eucalyptus\_diversicolor  
Eucalyptus\_delegatensis  
Eucalyptus\_decipiens  
Eucalyptus\_dalrympleana  
Eucalyptus\_crebra  
Eucalyptus\_cinerea  
Eucalyptus\_camphora  
Eucalyptus\_campaspe  
Eucalyptus\_camaldulensis  
Eucalyptus\_calophylla  
Eucalyptus\_caliginosa  
Eucalyptus\_bridgesiana  
Eucalyptus\_botryoides  
Eucalyptus\_blakeyi  
Eucalyptus\_amplifolia  
Eucalyptus\_accedens  
Eucalyptus\_melliodora  
Eucalyptus\_globulus  
Syzygium\_malaccense  
Qualea\_parviflora  
Qualea\_grandiflora  
Erismia\_bicolor  
Miconia\_argentea  
Henriettella\_caudata  
Mouriri\_myrtilloides  
Clidemia\_hirta  
Tococa\_bullifera  
Maieta\_guianensis  
Decodon\_verticillatus  
Sonneratia\_x  
Sonneratia\_alba  
Sonneratia\_caseolaris  
Lythrum\_salicaria  
Lafoensia\_pacari  
Chamerion\_angustifolium  
Oenothera\_humifusa  
Oenothera\_laciniata  
Oenothera\_biennis  
Conocarpus\_erectus  
Laguncularia\_racemosa  
Terminalia\_macroptera  
Lumnitzera\_littorea  
Lumnitzera\_racemosa  
Terminalia\_amazonia  
Geranium\_richardsonii  
Geranium\_pratense  
Parinari\_excelsa  
Licania\_michauxii  
Licania\_incana  
Licania\_hypoleuca  
Licania\_membranacea  
Hirtella\_racemosa  
Linum\_lewisii  
Didymocistus\_chrysadenius  
Phyllanthus\_choristylus  
Bridelia\_ferruginea  
Celaenodendron\_mexicanum  
Byrsonima\_verbascofolia  
Byrsonima\_crassa  
Byrsonima\_coccolobifolia  
Bunchosia\_lindeniana  
Peixotoa\_goiana  
Stigmaphyllon\_hypargyreum  
Banisteriopsis\_campestris  
Alchornea\_costaricensis  
Jatropha\_standleyi  
Jatropha\_malacophylla  
Croton\_suberosus

Croton\_pseudoniveus  
Croton\_goyazensis  
Croton\_argyranthemus  
Croton\_alamosanus  
Croton\_schiedeanus  
Neoboutonia\_macrocalyx  
Maprounea\_guianensis  
Mabea\_sessiliflorum  
Mabea\_angularis  
Triadica\_sebifera  
Mabea\_sp.  
Excoecaria\_agallocha  
Hura\_crepitans  
Macaranga\_tribola  
Macaranga\_hypoleuca  
Macaranga\_hulletti  
Macaranga\_hosei  
Macaranga\_gigantea  
Macaranga\_conifera  
Acalypha\_skutchii  
Acalypha\_diversifolia  
Dalechampia\_caperonioides  
Macaranga\_tanarius  
Omphalea\_oleifera  
Manihot\_spp.  
Manihot\_glaziovii  
Hevea\_parviflora  
Hevea\_guianensis  
Hevea\_brasiliensis  
Kielmeyera\_variabilis  
Kielmeyera\_coriacea  
Caraipa\_utilis  
Calophyllum\_brasiliense  
Clusia\_fockeana  
Garcinia\_edulis  
Hypericum\_perforatum  
Erythroxylum\_tortuosum  
Erythroxylum\_suberosum  
Erythroxylum\_mexicanum  
Erythroxylum\_deciduum  
Erythroxylum\_campestre  
Bruguiera\_parviflora  
Bruguiera\_exaristata  
Bruguiera\_cylindrica  
Bruguiera\_gymnorhiza  
Rhizophora\_x  
Rhizophora\_stylosa  
Rhizophora\_lamarckii  
Rhizophora\_apiculata  
Rhizophora\_mangle  
Rhizophora\_mucronata  
Ceriops\_decandra  
Ceriops\_tagal  
Ceriops\_australis  
Rinorea\_racemosa  
Rinorea\_flavescens  
Rinorea\_sylvatica  
Viola\_nuttallii  
Gloeospermum\_equatoriense  
Hybanthus\_prunifolius  
Orthion\_oblanceolatum  
Populus\_tremuloides  
Populus\_deltoides  
Salix\_gilgiana  
Salix\_eriocarpa  
Salix\_triandra  
Salix\_phylicifolia  
Salix\_myrsinifolia

Salix\_reticulata  
Salix\_miyabeana  
Casearia\_NA  
Casearia\_arborea  
Casearia\_nitida  
Hydnocarpus\_pentandra  
Connarus\_turczaninowii  
Connarus\_schultesii  
Connarus\_panamensis  
Cnestidium\_rufescens  
Tetratheca\_ericifolia  
Sloanea\_berteroana  
Sloanea\_australis  
Elaeocarpus\_sayeri  
Elaeocarpus\_ptilanthus  
Aristotelia\_chilensis  
Schizomeria\_spp.  
Ceratopetalum\_apetalum  
Ceratopetalum\_gummiferum  
Callicoma\_serratifolia  
Caldcluvia\_nymanii  
Peritassa\_pruinosa  
Lophopetalum\_spp.  
Salacia\_cordata  
Euonymus\_alatus  
Euonymus\_europaeus  
Paxistima\_myrsinites  
Celastrus\_orbiculata  
Pultenaea\_flexillis  
Pultenaea\_elliptica  
Pultenaea\_daphnoides  
Piliostigma\_thonningii  
Macrolobium\_sp.  
Macrolobium\_limbatum  
Macrolobium\_angustifolium  
Leonardoxa\_africana  
Cynometra\_oaxacana  
Cynometra\_iripa  
Cynometra\_retusa  
Detarium\_microcarpum  
Eperua\_grandiflora  
Hymenaea\_courbaril  
Burkea\_africana  
Cercis\_canadensis  
Swartzia\_gracilis  
Vatairea\_lundellii  
Sophora\_chrysophylla  
Lupinus\_argenteus  
Thermopsis\_rhombifolia  
Lupinus\_nanus  
Ormosia\_macrocalyx  
Pterocarpus\_rohrii  
Dalbergia\_spp.  
Dalbergia\_retusa  
Machaerium\_microphyllum  
Tephrosia\_virginiana  
Lonchocarpus\_spp.  
Lonchocarpus\_eriocarinalis  
Lonchocarpus\_guatemalensis  
Erythrina\_sandwicensis  
Erythrina\_poeppigiana  
Erythrina\_abyssinica  
Phaseolus\_vulgaris  
Glycine\_max  
Glycine\_tabacina  
Psoralea\_tenuiflora  
Lespedeza\_capitata  
Desmodium\_sandwicense

Rhynchosia\_reniformis  
Hardenbergia\_violacea  
Robinia\_pseudoacacia  
Trifolium\_hybridum  
Trifolium\_repens  
Trifolium\_fragiferum  
Trifolium\_pratense  
Trifolium\_dubium  
Medicago\_varia  
Trifolium\_campestre  
Medicago\_lupulina  
Melilotus\_officinalis  
Lathyrus\_venosus  
Lathyrus\_leucanthus  
Lathyrus\_latifolius  
Vicia\_americana  
Vicia\_cracca  
Lathyrus\_pratensis  
Onobrychis\_viciifolia  
Securigera\_varia  
Lotus\_corniculatus  
Sesbania\_tomentosa  
Myroxylon\_peruiferum  
Dussia\_mexicana  
Swartzia\_simplex  
Cassia\_fruticosa  
Cassia\_fasciculata  
Chamaecrista\_debilis  
Senna\_multijuga  
Chamaecrista\_fasciculata  
Prosopis\_spp.  
Prosopis\_pallida  
Mimosa\_pudica  
Senegalia\_gaumeri  
Acacia\_terminalis  
Acacia\_floribunda  
Acacia\_falcata  
Leucaena\_leucocephala  
Inga\_stipularis  
Inga\_spp.  
Inga\_semialata  
Inga\_heterophylla  
Inga\_sapindoides  
Cojoba\_rufescens  
Pithecellobium\_dulce  
Inga\_multijuga  
Inga\_acuminata  
Inga\_thibaudiana  
Inga\_nobilis  
Inga\_pezizifera  
Inga\_cocleensis  
Inga\_vera  
Inga\_marginata  
Inga\_goldmanii  
Inga\_laurina  
Inga\_umbellifera  
Caesalpinia\_caladenia  
Swartzia\_grandifolia  
Tachigali\_versicolor  
Dialium\_guianense  
Recchia\_mexicana  
Trilepisium\_phoberos  
Cecropia\_schreberiana  
Cecropia\_insignis  
Cecropia\_longipes  
Cecropia\_peltata  
Artocarpus\_heterophyllus  
Sorocea\_spp.

Trophis\_mexicana  
Maclura\_tinctoria  
Ficus\_cotinifolia  
Ficus\_insipida  
Castilla\_elastica  
Poulsenia\_armata  
Pseudolmedia\_oxyphyllaria  
Brosimum\_alicastrum  
Brosimum\_utile  
Dendrocnide\_excelsa  
Urera\_caracasana  
Celtis\_laevigata  
Celtis\_durandii  
Trema\_micrantha  
Celtis\_africana  
Chaetachme\_aristata  
Ulmus\_spp.  
Ampelocera\_hottlei  
Ulmus\_alata  
Maesopsis\_eminii  
Rhamnus\_cathartica  
Pomaderris\_lanigera  
Pomaderris\_ferruginea  
Gouania\_lupuloides  
Shepherdia\_canadensis  
Osteomeles\_anthyllidifolia  
Pyracantha\_angustifolia  
Crataegus\_monogyna  
Prunus\_pullei  
Prunus\_spinosa  
Prunus\_africana  
Prunus\_serotina  
Prunus\_virginiana  
Rosa\_arkansana  
Rubus\_spp.  
Rubus\_hawaiiensis  
Rubus\_ellipticus  
Rubus\_alleggheniensis  
Rubus\_chamaemorus  
Geum\_urbanum  
Geum\_aleppicum  
Sanguisorba\_officinalis  
Rosa\_canina  
Alchemilla\_vulgaris  
Potentilla\_arguta  
Fragaria\_ovalis  
Fragaria\_virginiana  
Potentilla\_recta  
Dryas\_octopetala  
Psiguria\_umbrosa  
Begonia\_spp.2  
Begonia\_spp.1  
Nothofagus\_moorei  
Nothofagus\_pumilio  
Fagus\_crenata  
Fagus\_sylvatica  
Fagus\_grandifolia  
Quercus\_velutina  
Quercus\_prinus  
Quercus\_phellos  
Quercus\_laevis  
Quercus\_ellipsoidalis  
Quercus\_alba  
Quercus\_illex  
Quercus\_myrsinifolia  
Lithocarpus\_glaber  
Castanopsis\_fargesii  
Quercus\_rubra

Quercus\_robur  
Quercus\_serrata  
Castanopsis\_eyrei  
Castanopsis\_tibetana  
Castanopsis\_carlesii  
Quercus\_glauca  
Morella\_rubra  
Carya\_ovata  
Juglans\_nigra  
Corylus\_americana  
Betula\_pubescens  
Betula\_papyrifera  
Betula\_pendula  
Alnus\_incana  
Adiantum\_obliquum  
Acrostichum\_speciosum  
Asplenium\_nidus  
Asplenium\_platyneuron  
Diplazium\_expansum  
Cystopteris\_fragilis  
Gymnocarpium\_dryopteris  
Thelypteris\_turrialbae  
Thelypteris\_cheilanthoides  
Phegopteris\_dryopteris  
Phegopteris\_connectilis  
Blechnum\_varians  
Lorinseria\_areolata  
Nephrolepis\_cordifolia  
Nephrolepis\_multiflora  
Polypodium\_polypodioides  
Polypodium\_virginianum  
Polypodium\_rhodopleuron  
Pleopeltis\_rhodopleuron  
Pleopeltis\_plebeium  
Polypodium\_plebeium  
Pleopeltis\_crassinervata  
Pleopeltis\_polypodioides  
Polypodium\_furfuraceum  
Polybotrya\_cervina  
Polystichum\_acrostichoides  
Polystichum\_muricatum  
Dicksonia\_antarctica  
Osmunda\_claytoniana  
Marattia\_laxa

;

END;

BEGIN TREES;

TRANSLATE

1 Picea\_abies,  
2 Picea\_mariana,  
3 Picea\_rubens,  
4 Picea\_glauca,  
5 Pinus\_strobus,  
6 Pinus\_banksiana,  
7 Pinus\_resinosa,  
8 Larix\_americana,  
9 Larix\_laricina,  
10 Pseudotsuga\_menziesii,  
11 Tsuga\_canadensis,  
12 Tsuga\_heterophylla,  
13 Abies\_balsamea,  
14 Abies\_grandis,  
15 Taxus\_brevifolia,  
16 Taxus\_canadensis,  
17 Juniperus\_communis,  
18 Thuja\_occidentalis,  
19 Thuja\_plicata,  
20 Nymphaea\_odorata,



21 Nuphar\_variegatum,  
22 Nuphar\_lutea,  
23 Brasenia\_schreberi,  
24 Asarum\_canadense,  
25 Piper\_stipulaceum,  
26 Piper\_arieianum,  
27 Piper\_reticulatum,  
28 Piper\_aduncum,  
29 Piper\_cenocladum,  
30 Otoba\_glycycarpa,  
31 Liriodendron\_tulipifera,  
32 Annona\_spraguei,  
33 Anaxagorea\_dolichocarpa,  
34 Oxandra\_panamensis,  
35 Oxandra\_asbeckii,  
36 Uvariopsis\_congensis,  
37 Asimina\_incana,  
38 Cymbopetalum\_baillonii,  
39 Guatteria\_conspicua,  
40 Virola\_calophylla,  
41 Lindera\_benzoin,  
42 Actinodaphne\_spp.,  
43 Persea\_americana,  
44 Neolitsea\_aurata,  
45 Nectandra\_ambigens,  
46 Cinnamomum\_verum,  
47 Cinnamomum\_spp.,  
48 Cinnamomum\_camphora,  
49 Cinnamomum\_subavenium,  
50 Machilus\_thunbergii,  
51 Phoebe\_cinnamomifolia,  
52 Gyrocarpus\_jatrophifolius,  
53 Wilkiea\_huegeliana,  
54 Doryphora\_sassafras,  
55 Heliconia\_metallica,  
56 Heliconia\_catheta,  
57 Calathea\_ovandensis,  
58 Calathea\_latifolia,  
59 Calathea\_cleistantha,  
60 Pleiostachya\_pruinosa,  
61 Marantochloa\_leucantha,  
62 Stachyphrynium\_griffithii,  
63 Costus\_villosissimus,  
64 Costus\_spp.,  
65 Pleuranthodium\_racemigerum,  
66 Alpinia\_modesta,  
67 Alpinia\_caerulea,  
68 Alpinia\_arctiflora,  
69 Aframomum\_mildbraedii,  
70 Aframomum\_cf.,  
71 Renealmia\_pluriplicata,  
72 Costus\_spicatus,  
73 Musa\_paradisiaca,  
74 Heliconia\_irrasa,  
75 Palisota\_mannii,  
76 Pollia\_condensata,  
77 Hanguana\_malayana,  
78 Pontederia\_cordata,  
79 Leptaspis\_zeilanica,  
80 Agropyron\_trachycaulum,  
81 Pharus\_latifolius,  
82 Rhipidocladum\_racemiflorum,  
83 Chusquea\_simpliciflora,  
84 Brachypodium\_sylvaticum,  
85 Hordeum\_vulgare,  
86 Bromus\_kalmii,  
87 Bromus\_hordeaceus,  
88 Bromus\_inermis,

89 Bromus\_erectus,  
90 Elymus\_canadensis,  
91 Elymus\_glaucus,  
92 Elymus\_repens,  
93 Deschampsia\_nubigena,  
94 Phleum\_pratense,  
95 Alopecurus\_pratensis,  
96 Helictotrichon\_pubescens,  
97 Poa\_pratensis,  
98 Poa\_trivialis,  
99 Festuca\_campestris,  
100 Festuca\_altaica,  
101 Festuca\_rubra,  
102 Lolium\_multiflorum,  
103 Festuca\_pratensis,  
104 Holcus\_lanatus,  
105 Dactylis\_glomerata,  
106 Anthoxanthum\_odoratum,  
107 Trisetum\_flavescens,  
108 Arrhenatherum\_elatius,  
109 Isachne\_distichophylla,  
110 Phragmites\_australis,  
111 Panicum\_lanuginosum,  
112 Melinis\_repens,  
113 Panicum\_capillare,  
114 Microstegium\_vimineum,  
115 Sorghum\_bicolor,  
116 Andropogon\_bladhii,  
117 Andropogon\_gerardii,  
118 Heteropogon\_contortus,  
119 Paspalum\_urvillei,  
120 Spartina\_alterniflora,  
121 Eragrostis\_variabilis,  
122 Microlaena\_stipoides,  
123 Carex\_consimilis,  
124 Carex\_plantaginea,  
125 Juncus\_roemerianus,  
126 Juncus\_mertensianus,  
127 Juncus\_gerardii,  
128 Luzula\_campestris,  
129 Catopsis\_sessiliflora,  
130 Vriesea\_sanguinolenta,  
131 Tillandsia\_deppeana,  
132 Tillandsia\_multicaulis,  
133 Tillandsia\_juncea,  
134 Tillandsia\_punctulata,  
135 Desmoncus\_orthacanthos,  
136 Astrocaryum\_mexicanum,  
137 Geonoma\_congesta,  
138 Chamaedorea\_spp.,  
139 Chamaedorea\_pinnatifrons,  
140 Chamaedorea\_ernesti\_augusti,  
141 Chamaedorea\_alternans,  
142 Calamus\_muelleri,  
143 Calamus\_caryotoides,  
144 Calamus\_australis,  
145 Livistona\_australis,  
146 Welfia\_regia,  
147 Jacquiniella\_teretifolia,  
148 Jacquiniella\_leucomelana,  
149 Astelia\_menziesiana,  
150 Molineria\_latifolia,  
151 Yucca\_filamentosa,  
152 Cordyline\_cannifolia,  
153 Dracaena\_laxissima,  
154 Dracaena\_fragrans,  
155 Maianthemum\_stellatum,  
156 Iris\_missouriensis,

157 *Crocosmia\_pottsii*,  
158 *Trimezia\_martinicensis*,  
159 *Lycaste\_aromatica*,  
160 *Trillium\_erectum*,  
161 *Trillium\_grandiflorum*,  
162 *Freycinetia\_spp.*,  
163 *Freycinetia\_excelsa*,  
164 *Asplundia\_uncinata*,  
165 *Cyclanthus\_bipartitus*,  
166 *Tacca\_integrifolia*,  
167 *Culcasia\_falcifolia*,  
168 *Pothos\_longipes*,  
169 *Spathiphyllum\_fulvovirens*,  
170 *Schismatoglottis\_wallichii*,  
171 *Alocasia\_brisbanensis*,  
172 *Posidonia\_oceanica*,  
173 *Sagittaria\_latifolia*,  
174 *Berberis\_repens*,  
175 *Thalictrum\_fendleri*,  
176 *Aquilegia\_coerulea*,  
177 *Aquilegia\_canadensis*,  
178 *Thalictrum\_dioicum*,  
179 *Delphinium\_nelsonii*,  
180 *Delphinium\_barbeyi*,  
181 *Anemone\_cylindrica*,  
182 *Hepatica\_nobilis*,  
183 *Ranunculus\_repens*,  
184 *Ranunculus\_acris*,  
185 *Berberis\_thunbergii*,  
186 *Abuta\_panamensis*,  
187 *Sanguinaria\_canadensis*,  
188 *Platanus\_occidentalis*,  
189 *Banksia\_serrata*,  
190 *Banksia\_oblongifolia*,  
191 *Hakea\_teretifolia*,  
192 *Hakea\_gibbosa*,  
193 *Hakea\_dactyloides*,  
194 *Grevillea\_speciosa*,  
195 *Grevillea\_sericea*,  
196 *Grevillea\_buxifolia*,  
197 *Banksia\_ericifolia*,  
198 *Xylomelum\_pyriforme*,  
199 *Isopogon\_anethifolius*,  
200 *Oreocallis\_sp.*,  
201 *Meliosma\_oldhamii*,  
202 *Gunnera\_mexicana*,  
203 *Tetracera\_spp.*,  
204 *Hibbertia\_obtusifolia*,  
205 *Hibbertia\_linearis*,  
206 *Hibbertia\_dentata*,  
207 *Doliocarpus\_major*,  
208 *Sabatia\_angularis*,  
209 *Strychnos\_tabascana*,  
210 *Strychnos\_mitis*,  
211 *Bonafousia\_undulata*,  
212 *Barjonia\_erecta*,  
213 *Cascabela\_ovata*,  
214 *Plumeria\_rubra*,  
215 *Funtumia\_latifolia*,  
216 *Apocynum\_cannabinum*,  
217 *Vincetoxicum\_rossicum*,  
218 *Asclepias\_curassavica*,  
219 *Asclepias\_incarnata*,  
220 *Asclepias\_syriaca*,  
221 *Stemmadenia\_donnellsmithii*,  
222 *Lacmellea\_panamensis*,  
223 *Aspidosperma\_tomentosum*,  
224 *Gentiana\_parryi*,

225 Borreria\_spp.,  
226 Coussarea\_curvigemma,  
227 Faramea\_occidentalis,  
228 Coprosma\_quadrifolia,  
229 Spermacoce\_assurgens,  
230 Galium\_biflorum,  
231 Galium\_boreale,  
232 Galium\_verum,  
233 Galium\_mollugo,  
234 Psychotria\_simiarum,  
235 Psychotria\_marginata,  
236 Psychotria\_glomerulata,  
237 Psychotria\_furcata,  
238 Psychotria\_faxlucens,  
239 Psychotria\_acuminata,  
240 Psychotria\_horizontalis,  
241 Palicourea\_rigida,  
242 Sabicea\_brasiliensis,  
243 Coffea\_canephora,  
244 Coffea\_arabica,  
245 Tocoyena\_pittieri,  
246 Randia\_spinosa,  
247 Crossopteryx\_febrifuga,  
248 Scyphiphora\_hydrophyllacea,  
249 Alseis\_blackiana,  
250 Calycophyllum\_spruceanum,  
251 Cinchona\_pubescens,  
252 Guettarda\_elliptica,  
253 Chomelia\_ribesioides,  
254 Hamelia\_longipes,  
255 Mitragyna\_inermis,  
256 Sarcocephalus\_latifolia,  
257 Phryganocydia\_corymbosa,  
258 Spathodea\_campanulata,  
259 Markhamia\_platycalyx,  
260 Catalpa\_speciosa,  
261 Arrabidaea\_candicans,  
262 Arrabidaea\_patellifera,  
263 Pandorea\_pandorana,  
264 Tabebuia\_rosea,  
265 Pinguicula\_moranensis,  
266 Schaueria\_calycobracteata,  
267 Avicennia\_rumphiana,  
268 Avicennia\_officinalis,  
269 Avicennia\_marina,  
270 Avicennia\_germinans,  
271 Aphelandra\_aurantiaca,  
272 Acanthus\_ilicifolius,  
273 Stachytarpheta\_jamaicensis,  
274 Lantana\_camara,  
275 Lippia\_graveolens,  
276 Castilleja\_sulphurea,  
277 Mimulus\_ringens,  
278 Vitex\_hemsleyi,  
279 Gmelina\_spp.,  
280 Premna\_angolensis,  
281 Betonica\_officinalis,  
282 Prostanthera\_denticulata,  
283 Prunella\_vulgaris,  
284 Agastache\_urticifolia,  
285 Glechoma\_hederacea,  
286 Hyptis\_saxatilis,  
287 Monarda\_fistulosa,  
288 Verbascum\_thapsus,  
289 Veronica\_chamaedrys,  
290 Plantago\_rugellii,  
291 Plantago\_hawaiensis,  
292 Plantago\_lanceolata,

293 Plantago\_media,  
294 Plantago\_major,  
295 Linaria\_vulgaris,  
296 Chrysothemis\_pulchella,  
297 Olea\_welwitschii,  
298 Olea\_europaea,  
299 Fraxinus\_pennsylvanica,  
300 Nestegis\_sandwicensis,  
301 Ligustrum\_vulgare,  
302 Ipomoea\_wolcottiana,  
303 Ipomoea\_spp.,  
304 Ipomoea\_hederacea,  
305 Bonamia\_maripoides,  
306 Ipomoea\_purpurea,  
307 Nothocestrum\_brevifolia,  
308 Cestrum\_panamense,  
309 Nicotiana\_glauca,  
310 Solanum\_umbellatum,  
311 Solanum\_spp.,  
312 Solanum\_ptychanthum,  
313 Solanum\_dulcamara,  
314 Datura\_stramonium,  
315 Solanum\_carolinense,  
316 Mertensia\_paniculata,  
317 Mertensia\_ciliata,  
318 Cordia\_eलाेagnoides,  
319 Cordia\_alliodora,  
320 Viguiera\_multiflora,  
321 Helianthella\_quinquenervis,  
322 Dubautia\_scabra,  
323 Arnica\_montana,  
324 Argyroxiphium\_kauense,  
325 Cirsium\_parryi,  
326 Cirsium\_oleraceum,  
327 Carduus\_nutans,  
328 Cirsium\_arvense,  
329 Bellis\_perennis,  
330 Solidago\_rigida,  
331 Solidago\_missouriensis,  
332 Solidago\_altissima,  
333 Solidago\_gigantea,  
334 Solidago\_canadensis,  
335 Solidago\_sempervirens,  
336 Aster\_novae\_angliae,  
337 Euthamia\_graminifolia,  
338 Erigeron\_strigosus,  
339 Erigeron\_speciosus,  
340 Erigeron\_annuus,  
341 Conyza\_canadensis,  
342 Pseudognaphalium\_sandwicenseum,  
343 Bidens\_pilosa,  
344 Ageratina\_riparia,  
345 Clibadium\_sp.,  
346 Mikania\_leiostachya,  
347 Ambrosia\_artemisiifolia,  
348 Baccharis\_pilularis,  
349 Baccharis\_halimifolia,  
350 Iva\_frutescens,  
351 Borrchia\_frutescens,  
352 Centaurea\_jacea,  
353 Senecio\_pauperculus,  
354 Senecio\_ovatus,  
355 Tussilago\_farfara,  
356 Senecio\_vulgaris,  
357 Lactuca\_ludoviciana,  
358 Cichorium\_intybus,  
359 Hypochaeris\_radicata,  
360 Scorzoneroideis\_autumnalis,

361 Leontodon\_autumnalis,  
362 Achillea\_millefolium,  
363 Leucanthemum\_vulagre,  
364 Artemisia\_norvegica,  
365 Artemisia\_ludoviciana,  
366 Artemisia\_biennis,  
367 Artemisia\_campestris,  
368 Leucanthemum\_vulgare,  
369 Lactuca\_serriola,  
370 Lactuca\_canadensis,  
371 Crepis\_biennis,  
372 Taraxacum\_officinale,  
373 Tragopogon\_dubius,  
374 Tragopogon\_pratensis,  
375 Cuttsia\_viburnea,  
376 Laurentia\_longiflora,  
377 Lobelia\_cardinalis,  
378 Campanula\_americanum,  
379 Campanula\_rotundifolia,  
380 Campanula\_rapunculoides,  
381 Xanthosia\_pilosa,  
382 Daucus\_carota,  
383 Anthriscus\_sylvestris,  
384 Pimpinella\_saxifraga,  
385 Aegopodium\_podagraria,  
386 Heracleum\_sphondylium,  
387 Pastinaca\_sativa,  
388 Carum\_carvi,  
389 Polyscias\_murrayi,  
390 Polyscias\_fulva,  
391 Dendropanax\_umbellatus,  
392 Lonicera\_xylosteum,  
393 Lonicera\_morrowi,  
394 Lonicera\_involucrata,  
395 Lonicera\_japonica,  
396 Knautia\_arvensis,  
397 Valeriana\_edulis,  
398 Viburnum\_acerifolium,  
399 Viburnum\_lantana,  
400 Sphenostemon\_papuanum,  
401 Polyosma\_cunninghamii,  
402 Quintinia\_sieberi,  
403 Ilex\_paraguariensis,  
404 Symplocos\_stellaris,  
405 Leucopogon\_esquamatus,  
406 Epacris\_tubiflora,  
407 Leucopogon\_microphyllus,  
408 Vaccinium\_vitis\_idaea,  
409 Vaccinium\_myrtillus,  
410 Vaccinium\_uliginosum,  
411 Kalmia\_latifolia,  
412 Arctostaphylos\_uva\_ursi,  
413 Schima\_superba,  
414 Camellia\_fraterna,  
415 Camellia\_sinensis,  
416 Eurya\_rubiginosa,  
417 Chrysophyllum\_spp.,  
418 Chrysophyllum\_pomiferum,  
419 Micropholis\_trunciflora,  
420 Micropholis\_egensis,  
421 Micropholis\_cayennensis,  
422 Micropholis\_brochidodroma,  
423 Pouteria\_stipitata,  
424 Pouteria\_peruviensis,  
425 Pouteria\_firma,  
426 Pouteria\_cuspidata,  
427 Pouteria\_caimito,  
428 Manilkara\_bidentata,

429 Pouteria\_reticulata,  
430 Micropholis\_venulosa,  
431 Micropholis\_guyanensis,  
432 Mimusops\_bagshawei,  
433 Chrysophyllum\_cainito,  
434 Ardisia\_spp.,  
435 Aegiceras\_corniculatum,  
436 Primula\_farinosa,  
437 Primula\_veris,  
438 Ardisia\_crenata,  
439 Diospyros\_abyssinica,  
440 Diospyros\_virginiana,  
441 Eurya\_muricata,  
442 Polemonium\_foliosissimum,  
443 Phlox\_drummondii,  
444 Ipomopsis\_aggregata,  
445 Couratari\_calycina,  
446 Lecythis\_poiteau,  
447 Impatiens\_capensis,  
448 Cornus\_alternifolia,  
449 Cornus\_sanguinea,  
450 Cornus\_florida,  
451 Aegialitis\_annulata,  
452 Polygonum\_viviparum,  
453 Polygonum\_cuspidatum,  
454 Rumex\_hastatulus,  
455 Rumex\_densiflorus,  
456 Rumex\_acetosa,  
457 Rumex\_acetosella,  
458 Coccoloba\_barbadensis,  
459 Ruprechtia\_fusca,  
460 Eriogonum\_umbellatum,  
461 Eriogonum\_tomentosum,  
462 Triplaris\_cumingiana,  
463 Coccoloba\_uvifera,  
464 Phytolacca\_rivinoides,  
465 Guapira\_spp.,  
466 Guapira\_macrocarpa,  
467 Phytolacca\_americana,  
468 Chenopodium\_simplex,  
469 Chenopodium\_album,  
470 Amaranthus\_hypochondriacus,  
471 Cerastium\_arvense,  
472 Cerastium\_fontanum,  
473 Silene\_antirrhina,  
474 Silene\_latifolia,  
475 Silene\_vulgaris,  
476 Achatocarpus\_gracilis,  
477 Strombosia\_scheffleri,  
478 Aextoxicon\_punctatum,  
479 Liquidambar\_styraciflua,  
480 Loropetalum\_chinense,  
481 Daphniphyllum\_oldhamii,  
482 Ribes\_cereum,  
483 Heuchera\_parvifolia,  
484 Vitis\_tiliifolia,  
485 Cissus\_hypoglauca,  
486 Vitis\_riparia,  
487 Cochlospermum\_vitifolium,  
488 Parashorea\_tomentella,  
489 Parashorea\_spp.,  
490 Parashorea\_malaanonan,  
491 Monotes\_kerstingii,  
492 Dryobalanops\_lanceolata,  
493 Anisoptera\_thurifera,  
494 Shorea\_spp.,  
495 Shorea\_parvifolia,  
496 Shorea\_multiflora,

497 Shorea\_leprosula,  
498 Shorea\_johorensis,  
499 Shorea\_glaucescens,  
500 Shorea\_gibbosa,  
501 Shorea\_fallax,  
502 Shorea\_acuminatissima,  
503 Hopea\_nervosa,  
504 Hopea\_beccariana,  
505 Robinsonella\_mirandae,  
506 Pachira\_insignis,  
507 Pachira\_flaviflora,  
508 Pachira\_brevipes,  
509 Theobroma\_cacao,  
510 Heritiera\_littoralis,  
511 Ceiba\_grandiflora,  
512 Ceiba\_aesculifolia,  
513 Ceiba\_pentandra,  
514 Eriotheca\_sp.,  
515 Eriotheca\_globosa,  
516 Eriotheca\_longitubulosa,  
517 Pachira\_aquatica,  
518 Brachychiton\_acerifolius,  
519 Cola\_nitida,  
520 Tilia\_cordata,  
521 Abutilon\_theophrasti,  
522 Pavonia\_rosa\_campestris,  
523 Gossypium\_thurberi,  
524 Hampea\_appendiculata,  
525 Tilia\_americana,  
526 Lasiopetalum\_ferrugineum,  
527 Heliocarpus\_pallidus,  
528 Heliocarpus\_appendiculatus,  
529 Luehea\_seemannii,  
530 Pachira\_quinata,  
531 Pimelea\_linifolia,  
532 Daphne\_laureola,  
533 Gonystylus\_spp.,  
534 Raphanus\_raphanistrum,  
535 Alliaria\_petiolata,  
536 Thlaspi\_arvense,  
537 Lepidium\_campestre,  
538 Capsella\_bursa\_pastoris,  
539 Arabidopsis\_lyrata,  
540 Lepidium\_densiflorum,  
541 Arabidopsis\_thaliana,  
542 Raphanus\_sativus,  
543 Brassica\_oleracea,  
544 Carica\_papaya,  
545 Thinouia\_tomocarpa,  
546 Elattostachys\_nervosa,  
547 Acer\_saccharinum,  
548 Acer\_pensylvanicum,  
549 Acer\_pseudoplatanus,  
550 Acer\_rubrum,  
551 Acer\_platanoides,  
552 Acer\_oblongum,  
553 Acer\_saccharum,  
554 Acer\_glabrum,  
555 Acer\_negundo,  
556 Dodonaea\_triquetra,  
557 Dodonaea\_viscosa,  
558 Paullinia\_spp.,  
559 Paullinia\_sessiliflora,  
560 Paullinia\_cururu,  
561 Thouinia\_paucidentata,  
562 Allophylus\_campostachys,  
563 Mischocarpus\_spp.,  
564 Vouarana\_guianensis,



565 Cupania\_dentata,  
566 Trichilia\_trifolia,  
567 Synoum\_glandulosum,  
568 Aglaia\_mackiana,  
569 Guarea\_glabra,  
570 Xylocarpus\_mekongensis,  
571 Xylocarpus\_australasicus,  
572 Xylocarpus\_granatum,  
573 Xylocarpus\_moluccensis,  
574 Swietenia\_macrophylla,  
575 Toona\_ciliata,  
576 Toona\_australis,  
577 Cedrela\_odorata,  
578 Zieria\_pilosa,  
579 Zieria\_laevigata,  
580 Philotheca\_salsolifolia,  
581 Crowea\_saligna,  
582 Boronia\_ledifolia,  
583 Eriostemon\_australasius,  
584 Citrus\_sinensis,  
585 Citrus\_reticulata,  
586 Tapirira\_guianensis,  
587 Spondias\_mombin,  
588 Anacardium\_excelsum,  
589 Rhus\_radicans,  
590 Rhus\_glabra,  
591 Schinus\_terebinthifolius,  
592 Rhus\_typhina,  
593 Spondias\_radlkoferi,  
594 Bursera\_instabilis,  
595 Bursera\_heteresthes,  
596 Bursera\_excelsa,  
597 Bursera\_simaruba,  
598 Dacryodes\_excelsa,  
599 Tetragastris\_panamensis,  
600 Protium\_trifoliolatum,  
601 Protium\_subserratum,  
602 Protium\_spruceanum,  
603 Protium\_paniculatum,  
604 Protium\_pallidum,  
605 Protium\_nodulosum,  
606 Protium\_laxiflorum,  
607 Protium\_krukoffii,  
608 Protium\_heptaphyllum,  
609 Protium\_hebetatum,  
610 Protium\_giganteum,  
611 Protium\_gallosum,  
612 Protium\_decandrum,  
613 Protium\_calanense,  
614 Protium\_aracouchini,  
615 Protium\_tenuifolium,  
616 Protium\_sagotianum,  
617 Protium\_opacum,  
618 Syzygium\_spp.,  
619 Syncarpia\_glomulifera,  
620 Osbornia\_octodonta,  
621 Eugenia\_spp.,  
622 Eugenia\_ochneocarpa,  
623 Darwinia\_fascicularis,  
624 Syzygium\_jambos,  
625 Metrosideros\_polymorpha,  
626 Angophora\_floribunda,  
627 Angophora\_hispida,  
628 Psidium\_sartorianum,  
629 Psidium\_cattleianum,  
630 Pimenta\_racemosa,  
631 Psidium\_guajava,  
632 Eucalyptus\_youmanii,

633 Eucalyptus\_wandoo,  
634 Eucalyptus\_viminalis,  
635 Eucalyptus\_umbra,  
636 Eucalyptus\_triflora,  
637 Eucalyptus\_tereticornis,  
638 Eucalyptus\_stellulata,  
639 Eucalyptus\_st,  
640 Eucalyptus\_sieberi,  
641 Eucalyptus\_sideroxylon,  
642 Eucalyptus\_sclerophylla,  
643 Eucalyptus\_rudis,  
644 Eucalyptus\_rubida,  
645 Eucalyptus\_rossii,  
646 Eucalyptus\_resinifera,  
647 Eucalyptus\_radiata,  
648 Eucalyptus\_racemosa,  
649 Eucalyptus\_pulverulenta,  
650 Eucalyptus\_polyanthemos,  
651 Eucalyptus\_pilularis,  
652 Eucalyptus\_perriniana,  
653 Eucalyptus\_pauciflora,  
654 Eucalyptus\_patens,  
655 Eucalyptus\_obtusiflora,  
656 Eucalyptus\_obliqua,  
657 Eucalyptus\_nova\_anglica,  
658 Eucalyptus\_molluccana,  
659 Eucalyptus\_microcorys,  
660 Eucalyptus\_megacarpa,  
661 Eucalyptus\_marginata,  
662 Eucalyptus\_mannifera,  
663 Eucalyptus\_macrorhyncha,  
664 Eucalyptus\_haemastoma,  
665 Eucalyptus\_gummifera,  
666 Eucalyptus\_gullickii,  
667 Eucalyptus\_griffithsii,  
668 Eucalyptus\_gomphocephala,  
669 Eucalyptus\_foecunda,  
670 Eucalyptus\_fibrosa,  
671 Eucalyptus\_fastigata,  
672 Eucalyptus\_elata,  
673 Eucalyptus\_drummondii,  
674 Eucalyptus\_dives,  
675 Eucalyptus\_diversicolor,  
676 Eucalyptus\_delegatensis,  
677 Eucalyptus\_decipiens,  
678 Eucalyptus\_dalrympleana,  
679 Eucalyptus\_crebra,  
680 Eucalyptus\_cinerea,  
681 Eucalyptus\_camphora,  
682 Eucalyptus\_campaspe,  
683 Eucalyptus\_camaldulensis,  
684 Eucalyptus\_calophylla,  
685 Eucalyptus\_caliginosa,  
686 Eucalyptus\_bridgesiana,  
687 Eucalyptus\_botryoides,  
688 Eucalyptus\_blakelyi,  
689 Eucalyptus\_amplifolia,  
690 Eucalyptus\_accedens,  
691 Eucalyptus\_melliodora,  
692 Eucalyptus\_globulus,  
693 Syzygium\_malaccense,  
694 Qualea\_parviflora,  
695 Qualea\_grandiflora,  
696 Erisma\_bicolor,  
697 Miconia\_argentea,  
698 Henriettella\_caudata,  
699 Mouriri\_myrtilloides,  
700 Clidemia\_hirta,

701 Tococa\_bullifera,  
702 Maieta\_guianensis,  
703 Decodon\_verticillatus,  
704 Sonneratia\_x,  
705 Sonneratia\_alba,  
706 Sonneratia\_caseolaris,  
707 Lythrum\_salicaria,  
708 Lafoensia\_pacari,  
709 Chamerion\_angustifolium,  
710 Oenothera\_humifusa,  
711 Oenothera\_laciniata,  
712 Oenothera\_biennis,  
713 Conocarpus\_erectus,  
714 Laguncularia\_racemosa,  
715 Terminalia\_macroptera,  
716 Lumnitzera\_littorea,  
717 Lumnitzera\_racemosa,  
718 Terminalia\_amazonia,  
719 Geranium\_richardsonii,  
720 Geranium\_pratense,  
721 Parinari\_excelso,  
722 Licania\_michauxii,  
723 Licania\_incana,  
724 Licania\_hypoleuca,  
725 Licania\_membranacea,  
726 Hirtella\_racemosa,  
727 Linum\_lewisii,  
728 Didymocistus\_chrysadenius,  
729 Phyllanthus\_choristylus,  
730 Bridelia\_ferruginea,  
731 Celaenodendron\_mexicanum,  
732 Byrsonima\_verbascifolia,  
733 Byrsonima\_crassa,  
734 Byrsonima\_coccolobifolia,  
735 Bunchosia\_lindeniana,  
736 Peixotoa\_goiana,  
737 Stigmaphyllon\_hypargyreum,  
738 Banisteriopsis\_campestris,  
739 Alchornea\_costaricensis,  
740 Jatropha\_standleyi,  
741 Jatropha\_malacophylla,  
742 Croton\_suberosus,  
743 Croton\_pseudoniveus,  
744 Croton\_goyazensis,  
745 Croton\_argyranthemus,  
746 Croton\_alamosanus,  
747 Croton\_schiedeanus,  
748 Neoboutonia\_macrocalyx,  
749 Maprounea\_guianensis,  
750 Mabea\_sessiliflorum,  
751 Mabea\_angularis,  
752 Triadica\_sebifera,  
753 Mabea\_sp.,  
754 Excoecaria\_agallocha,  
755 Hura\_crepitans,  
756 Macaranga\_tribola,  
757 Macaranga\_hypoleuca,  
758 Macaranga\_hulletti,  
759 Macaranga\_hosei,  
760 Macaranga\_gigantea,  
761 Macaranga\_conifera,  
762 Acalypha\_skutchii,  
763 Acalypha\_diversifolia,  
764 Dalechampia\_caperonioides,  
765 Macaranga\_tanarius,  
766 Omphalea\_oleifera,  
767 Manihot\_spp.,  
768 Manihot\_glaziovii,

769 Hevea\_parviflora,  
770 Hevea\_guianensis,  
771 Hevea\_brasiliensis,  
772 Kielmeyera\_variabilis,  
773 Kielmeyera\_coriacea,  
774 Caraipa\_utilis,  
775 Calophyllum\_brasiliense,  
776 Clusia\_fockeana,  
777 Garcinia\_edulis,  
778 Hypericum\_perforatum,  
779 Erythroxylum\_tortuosum,  
780 Erythroxylum\_suberosum,  
781 Erythroxylum\_mexicanum,  
782 Erythroxylum\_deciduum,  
783 Erythroxylum\_campestre,  
784 Bruguiera\_parviflora,  
785 Bruguiera\_exaristata,  
786 Bruguiera\_cylindrica,  
787 Bruguiera\_gymnorhiza,  
788 Rhizophora\_x,  
789 Rhizophora\_stylosa,  
790 Rhizophora\_lamarckii,  
791 Rhizophora\_apiculata,  
792 Rhizophora\_mangle,  
793 Rhizophora\_mucronata,  
794 Ceriops\_decandra,  
795 Ceriops\_tagal,  
796 Ceriops\_australis,  
797 Rinorea\_racemosa,  
798 Rinorea\_flavescens,  
799 Rinorea\_sylvatica,  
800 Viola\_nuttallii,  
801 Gloeospermum\_equatoriense,  
802 Hybanthus\_prunifolius,  
803 Orthion\_oblanceolatum,  
804 Populus\_tremuloides,  
805 Populus\_deltoides,  
806 Salix\_gilgiana,  
807 Salix\_eriocarpa,  
808 Salix\_triandra,  
809 Salix\_phylicifolia,  
810 Salix\_myrsinifolia,  
811 Salix\_reticulata,  
812 Salix\_miyabeana,  
813 Casearia\_NA,  
814 Casearia\_arborea,  
815 Casearia\_nitida,  
816 Hydnocarpus\_pentandra,  
817 Connarus\_turczaninowii,  
818 Connarus\_schultesii,  
819 Connarus\_panamensis,  
820 Cnestidium\_rufescens,  
821 Tetratheca\_ericifolia,  
822 Sloanea\_berteroana,  
823 Sloanea\_australis,  
824 Elaeocarpus\_sayeri,  
825 Elaeocarpus\_ptilanthus,  
826 Aristotelia\_chilensis,  
827 Schizomeria\_spp.,  
828 Ceratopetalum\_apetalum,  
829 Ceratopetalum\_gummiferum,  
830 Callicoma\_serratifolia,  
831 Caldcluvia\_nymanii,  
832 Peritassa\_pruinosa,  
833 Lophopetalum\_spp.,  
834 Salacia\_cordata,  
835 Euonymus\_alatus,  
836 Euonymus\_europaeus,

837 Paxistima\_myrsinites,  
838 Celastrus\_orbiculata,  
839 Pultenaea\_flexillis,  
840 Pultenaea\_elliptica,  
841 Pultenaea\_daphnoides,  
842 Piliostigma\_thonningii,  
843 Macrolobium\_sp.,  
844 Macrolobium\_limbatum,  
845 Macrolobium\_angustifolium,  
846 Leonardoxa\_africana,  
847 Cynometra\_oaxacana,  
848 Cynometra\_iripa,  
849 Cynometra\_retusa,  
850 Detarium\_microcarpum,  
851 Eperua\_grandiflora,  
852 Hymenaea\_courbaril,  
853 Burkea\_africana,  
854 Cercis\_canadensis,  
855 Swartzia\_gracilis,  
856 Vatairea\_lundellii,  
857 Sophora\_chrysophylla,  
858 Lupinus\_argenteus,  
859 Thermopsis\_rhombifolia,  
860 Lupinus\_nanus,  
861 Ormosia\_macrocalyx,  
862 Pterocarpus\_rohrrii,  
863 Dalbergia\_spp.,  
864 Dalbergia\_retusa,  
865 Machaerium\_microphyllum,  
866 Tephrosia\_virginiana,  
867 Lonchocarpus\_spp.,  
868 Lonchocarpus\_eriocarinalis,  
869 Lonchocarpus\_guatemalensis,  
870 Erythrina\_sandwicensis,  
871 Erythrina\_poeppigiana,  
872 Erythrina\_abyssinica,  
873 Phaseolus\_vulgaris,  
874 Glycine\_max,  
875 Glycine\_tabacina,  
876 Psoralea\_tenuiflora,  
877 Lespedeza\_capitata,  
878 Desmodium\_sandwicense,  
879 Rhynchosia\_reniformis,  
880 Hardenbergia\_violacea,  
881 Robinia\_pseudoacacia,  
882 Trifolium\_hybridum,  
883 Trifolium\_repens,  
884 Trifolium\_fragiferum,  
885 Trifolium\_pratense,  
886 Trifolium\_dubium,  
887 Medicago\_varia,  
888 Trifolium\_campestre,  
889 Medicago\_lupulina,  
890 Melilotus\_officinalis,  
891 Lathyrus\_venosus,  
892 Lathyrus\_leucanthus,  
893 Lathyrus\_latifolius,  
894 Vicia\_americana,  
895 Vicia\_cracca,  
896 Lathyrus\_pratensis,  
897 Onobrychis\_viciifolia,  
898 Securigera\_varia,  
899 Lotus\_corniculatus,  
900 Sesbania\_tomentosa,  
901 Myroxylon\_peruiferum,  
902 Dussia\_mexicana,  
903 Swartzia\_simplex,  
904 Cassia\_fruticosa,

905 Cassia\_fasciculata,  
906 Chamaecrista\_debilis,  
907 Senna\_multijuga,  
908 Chamaecrista\_fasciculata,  
909 Prosopis\_spp.,  
910 Prosopis\_pallida,  
911 Mimosa\_pudica,  
912 Senegalia\_gaumeri,  
913 Acacia\_terminalis,  
914 Acacia\_floribunda,  
915 Acacia\_falcata,  
916 Leucaena\_leucocephala,  
917 Inga\_stipularis,  
918 Inga\_spp.,  
919 Inga\_semialata,  
920 Inga\_heterophylla,  
921 Inga\_sapindoides,  
922 Cojoba\_rufescens,  
923 Pithecellobium\_dulce,  
924 Inga\_multijuga,  
925 Inga\_acuminata,  
926 Inga\_thibaudiana,  
927 Inga\_nobilis,  
928 Inga\_pezizifera,  
929 Inga\_cocleensis,  
930 Inga\_vera,  
931 Inga\_marginata,  
932 Inga\_goldmanii,  
933 Inga\_laurina,  
934 Inga\_umbellifera,  
935 Caesalpinia\_caladenia,  
936 Swartzia\_grandifolia,  
937 Tachigali\_versicolor,  
938 Dialium\_guianense,  
939 Recchia\_mexicana,  
940 Trilepisium\_phoberos,  
941 Cecropia\_schreberiana,  
942 Cecropia\_insignis,  
943 Cecropia\_longipes,  
944 Cecropia\_peltata,  
945 Artocarpus\_heterophyllus,  
946 Sorocea\_spp.,  
947 Trophis\_mexicana,  
948 Maclura\_tinctoria,  
949 Ficus\_cotinifolia,  
950 Ficus\_insipida,  
951 Castilla\_elastica,  
952 Poulsenia\_armata,  
953 Pseudolmedia\_oxyphyllaria,  
954 Brosimum\_alicastrum,  
955 Brosimum\_utile,  
956 Dendrocnide\_excelsa,  
957 Urera\_caracasana,  
958 Celtis\_laevigata,  
959 Celtis\_durandii,  
960 Trema\_micrantha,  
961 Celtis\_africana,  
962 Chaetachme\_aristata,  
963 Ulmus\_spp.,  
964 Ampelocera\_hottlei,  
965 Ulmus\_alata,  
966 Maesopsis\_eminii,  
967 Rhamnus\_cathartica,  
968 Pomaderris\_lanigera,  
969 Pomaderris\_ferruginea,  
970 Gouania\_lupuloides,  
971 Shepherdia\_canadensis,  
972 Osteomeles\_anthyllidifolia,

973 Pyracantha\_angustifolia,  
974 Crataegus\_monogyna,  
975 Prunus\_pullei,  
976 Prunus\_spinosa,  
977 Prunus\_africana,  
978 Prunus\_serotina,  
979 Prunus\_virginiana,  
980 Rosa\_arkansana,  
981 Rubus\_spp.,  
982 Rubus\_hawaiiensis,  
983 Rubus\_ellipticus,  
984 Rubus\_alleghehiensis,  
985 Rubus\_chamaemorus,  
986 Geum\_urbanum,  
987 Geum\_aleppicum,  
988 Sanguisorba\_officinalis,  
989 Rosa\_canina,  
990 Alchemilla\_vulgaris,  
991 Potentilla\_arguta,  
992 Fragaria\_ovalis,  
993 Fragaria\_virginiana,  
994 Potentilla\_recta,  
995 Dryas\_octopetala,  
996 Psiguria\_umbrosa,  
997 Begonia\_spp.2,  
998 Begonia\_spp.1,  
999 Nothofagus\_moorei,  
1000 Nothofagus\_pumilio,  
1001 Fagus\_crenata,  
1002 Fagus\_sylvatica,  
1003 Fagus\_grandifolia,  
1004 Quercus\_velutina,  
1005 Quercus\_prinus,  
1006 Quercus\_phellos,  
1007 Quercus\_laevis,  
1008 Quercus\_ellipsoidalis,  
1009 Quercus\_alba,  
1010 Quercus\_ilex,  
1011 Quercus\_myrsinifolia,  
1012 Lithocarpus\_glaber,  
1013 Castanopsis\_fargesii,  
1014 Quercus\_rubra,  
1015 Quercus\_robur,  
1016 Quercus\_serrata,  
1017 Castanopsis\_eyrei,  
1018 Castanopsis\_tibetana,  
1019 Castanopsis\_carlesii,  
1020 Quercus\_glauca,  
1021 Morella\_rubra,  
1022 Carya\_ovata,  
1023 Juglans\_nigra,  
1024 Corylus\_americana,  
1025 Betula\_pubescens,  
1026 Betula\_papyrifera,  
1027 Betula\_pendula,  
1028 Alnus\_incana,  
1029 Adiantum\_obliquum,  
1030 Acrostichum\_speciosum,  
1031 Asplenium\_nidus,  
1032 Asplenium\_platyneuron,  
1033 Diplazium\_expansum,  
1034 Cystopteris\_fragilis,  
1035 Gymnocarpium\_dryopteris,  
1036 Thelypteris\_turrialbae,  
1037 Thelypteris\_cheilanthes,  
1038 Phegopteris\_dryopteris,  
1039 Phegopteris\_connectilis,  
1040 Blechnum\_varians,

1041 Lorinseria\_areolata,  
 1042 Nephrolepis\_cordifolia,  
 1043 Nephrolepis\_multiflora,  
 1044 Polypodium\_polypodioides,  
 1045 Polypodium\_virginianum,  
 1046 Polypodium\_rhodopleuron,  
 1047 Pleopeltis\_rhodopleuron,  
 1048 Pleopeltis\_plebeium,  
 1049 Polypodium\_plebeium,  
 1050 Pleopeltis\_crassinervata,  
 1051 Pleopeltis\_polypodioides,  
 1052 Polypodium\_furfuraceum,  
 1053 Polybotrya\_cervina,  
 1054 Polystichum\_acrostichoides,  
 1055 Polystichum\_muricatum,  
 1056 Dicksonia\_antarctica,  
 1057 Osmunda\_claytoniana,  
 1058 Marattia\_laxa

;

TREE \* UNTITLED = [&R] (((((((((1:1.666875131,2:1.666875131):2.036834343,3:3.703708474):  
 7.60207214,4:11.30578061):43.97019071,(5:21.57370352,(6:8.728155199,7:8.728155199):  
 12.84554932):24.13303213,(8:16.97258423,9:16.97258423,10:16.97258423):22.24851574,  
 (11:26.87393133,12:26.87393133,(13:10.48178269,14:10.48178269):16.39214764):12.34716864):  
 6.48563668):9.569234671):255.6454943,(15:9.330482217,16:9.330482217):56.44135143,  
 ((17:6.836473766,18:6.836473766):3.098014052,19:9.934487818):55.83734683):245.149631):  
 52.36629956,(20:20.95492344,(21:13.2388746,22:13.2388746,23:13.2388746):7.716048844):  
 151.8669278,((24:76.58256281,(25:19.49441452,26:19.49441452,27:19.49441452,  
 (28:13.84948865,29:13.84948865):5.644925867):57.08814729):29.79979342,(30:71.24725778,  
 (31:67.52178046,(32:49.25230692,33:49.25230692,(34:41.17992305,35:41.17992305,  
 (36:15.65646928,37:15.65646928):14.67861713,(38:22.85664766,39:22.85664766):7.478438756):  
 10.84483664):8.072383866):18.26947354):3.725477322,40:71.24725778):26.52540947,  
 (((41:12.85196024,(42:9.342227042,(43:8.140119105,(44:6.476566804,(45:4.422349881,  
 (46:1.897580816,47:1.897580816,48:1.897580816,49:1.897580816):2.524769065):2.054216923):  
 1.6635523):1.202107937):1.620066428,50:10.96229347):1.889666771):2.951422621,51:15.80338286):  
 20.46835186,52:36.27173572):6.49780294,53:42.76953766):10.22781309,54:52.99735075):  
 44.77531649):8.609688986):52.71287118,((((55:84.18805924,56:84.18805924,  
 (((57:16.16575493,58:16.16575493,59:16.16575493,60:16.16575493):14.92980083,61:31.09555576):  
 6.583442233,62:37.67899799):36.76832078,(63:64.9225269,64:64.9225269,  
 (65:14.7534305,66:14.7534305,67:14.7534305,68:14.7534305,69:14.7534305,70:14.7534305,71:14.7534  
 305):50.1690964,72:64.9225269):9.524791869):6.888772297,73:81.33609107):  
 2.85196817,74:84.18805924):12.71098571,(((75:34.79673453,76:34.79673453):  
 31.90688208,77:66.70361661):7.665831263,78:74.36944788):22.52959607):7.362745295,  
 (((79:60.81220375,80:60.81220375,81:60.81220375,(82:14.82466311,83:14.82466311):37.59274378,  
 (((84:24.54159577,(85:16.53809057,(86:8.189353218,87:8.189353218,  
 (88:5.39891047,89:5.39891047):2.790442748):6.819985366,(90:3.811383967,91:3.811383967):  
 3.967744832,92:7.779128799):7.230209785):1.528751988):8.003505201):7.546890026,  
 (((93:16.96885495,(94:9.069159841,95:9.069159841):4.695012654,(96:9.555485218,  
 (97:5.297800389,98:5.297800389):4.25768483):4.208687276):3.204682457):3.204968181,  
 (99:17.48000122,100:17.48000122,101:17.48000122,(102:5.107654486,103:5.107654486):12.37234674):  
 2.693821908):4.701596729,(104:22.69913606,(105:17.35259594,(106:14.09612593,  
 (107:7.157134877,108:7.157134877):6.938992049):3.256470013):5.346539124):2.176283798):  
 7.213065937):12.73830321,((109:19.20681669,110:19.20681669):17.64930759,  
 (((111:12.39265614,112:12.39265614,113:12.39265614):10.54555085,((114:7.683194615,  
 (115:5.080380686,(116:3.913852646,117:3.913852646,118:3.913852646):1.16652804):2.602813929):  
 10.93886673,119:18.62206134):4.316146641):9.293772791,(120:17.7848134,121:17.7848134):  
 14.44716637):4.624143511):7.970663722):5.094814565,122:49.92160357):2.495804314):8.39479686):  
 15.63251969,(123:54.14779893,124:54.14779893,  
 (125:32.80816006,126:32.80816006,127:32.80816006,128:32.80816006):21.33963887):22.2969255):  
 2.862534417,((129:14.24467407,130:14.24467407):4.39240607,(131:8.465893943,132:8.465893943,  
 (133:4.338199436,134:4.338199436):4.127694507):10.1711862):60.67017771):13.86465583,  
 (135:21.9642297,(136:18.11661672,(137:12.97264596,  
 (138:10.47624039,139:10.47624039,140:10.47624039,141:10.47624039,  
 (142:6.630031835,143:6.630031835,144:6.630031835,145:6.630031835):3.846208559):2.49640557):  
 1.579525218,146:14.55217118):3.564445535):3.847612979):71.20768398):11.08987657):5.333864657,  
 (147:83.43539038,148:83.43539038,(149:50.95639354,150:50.95639354):27.40744098,  
 (151:33.87023556,(152:27.41047731,(153:13.9539995,154:13.9539995,155:13.9539995):13.45647781):  
 6.459758251):21.01550492,(156:35.54989952,(157:22.87329253,158:22.87329253):12.67660699):  
 19.33584196):23.47809403):5.071555858,159:83.43539038):26.16026453):4.563350476,



(160:7.125869205,161:7.125869205):107.0331362):2.910899471,((162:65.91406035,163:65.91406035,  
(164:22.92787989,165:22.92787989):42.98618046):36.83934769,166:102.753408):14.31649681):  
15.18992589,(((167:26.15850758,168:26.15850758):10.73096011,(169:33.978395,  
(170:20.07602679,171:20.07602679):13.90236921):2.911071689):64.46882973,  
(172:67.85501236,173:67.85501236):33.50328406):30.90153432):25.19497898,(((174:69.57760466,  
(175:18.91860664,176:18.91860664,177:18.91860664,178:18.91860664):30.76602702,  
(179:40.82337282,180:40.82337282,((181:10.97093099,182:10.97093099):23.52348386,  
(183:9.079597784,184:9.079597784):25.41481707):6.328957974):8.861260843):  
19.89297099,185:69.57760466):19.27611059,186:88.85371524):32.567812,187:121.4215272):  
20.94504208,((188:98.93584956,(((189:24.06693902,190:24.06693902,  
(191:4.825450345,192:4.825450345,193:4.825450345,194:4.825450345,195:4.825450345,196:4.82545034  
5):19.24148868,197:24.06693902):8.116114553,198:32.18305258):7.675532379,199:39.85858496):  
13.90929624,200:53.7678812):45.16796836):39.2238531,(201:133.6132713,(202:128.0392377,  
(203:52.88164763,(204:30.32578294,205:30.32578294,206:30.32578294,207:30.32578294):  
22.5558647):72.5283837,(((((((208:69.12467013,(209:59.2326098,210:59.2326098,  
(211:48.08464154,212:48.08464154,((213:22.88140781,214:22.88140781):15.68797165,  
(215:28.27634374,(216:22.28878799,(217:11.77608759,  
(218:5.56775797,219:5.56775797,220:5.56775797):6.20832962):10.5127004):5.987554751):  
10.29303572):4.205908939,(221:35.30649503,222:35.30649503):7.468794373):  
5.30935414,223:48.08464254):11.14796726):9.892060328,224:69.12467013):8.708776569,  
(225:67.97201847,((226:30.8169584,227:30.8169584):22.14993666,((228:36.49024134,  
(229:28.7684406,(230:9.06201528,231:9.06201528,(232:2.075740728,233:2.075740728):6.986274551):  
19.70642532):7.721800739):11.3748604,  
(234:21.96246399,235:21.96246399,236:21.96246399,237:21.96246399,238:21.96246399,239:21.9624639  
9,240:21.96246399,241:21.96246399):25.90263776):5.101793318):15.0051244,(((242:38.24470769,  
(243:15.08329616,244:15.08329616,(245:7.17569145,246:7.17569145):7.907604709):8.435862367,  
(247:19.49414704,248:19.49414704):4.025011486):8.669548881,249:32.18870741):6.056000279):  
7.28368342,250:45.52839111):13.21700641,(251:36.10406152,((252:9.312022962,253:9.312022962):  
17.94176124,(254:23.67074,(255:8.10596742,256:8.10596742):15.56477258):3.583044206):  
8.850277314):22.641337):9.226620952):9.861426231):10.57276452,  
(((((((257:35.82034246,258:35.82034346,((259:22.32979405,(260:18.454315,  
261:11.11993738,262:11.11993738,263:11.11993738):7.334376622):3.87547905):  
4.239058413,264:26.56885247):9.251490996):9.696946042,(265:42.31223596,(266:32.40071712,  
(267:17.27009245,268:17.27009245,269:17.27009245,270:17.27009245):15.13062466,  
(271:12.92015039,272:12.92015039):19.48056673):9.911518848):3.205053538):3.261623577,  
(273:26.12410263,(274:12.6080228,275:12.6080228):13.51607884):22.65481045):1.84230145,  
(276:44.95048908,277:44.95048908):3.666919316,(((278:25.24356968,279:25.24356968):3.70881619,  
(280:20.88625661,281:20.88625661):8.066128267):4.009842159,282:32.96222703):7.568878516,  
(283:26.71831822,((284:15.46856896,285:15.46856896):7.120562104,  
(286:14.13867719,287:14.13867719):8.450453873):4.129187152):13.81278733):8.086302851):  
2.00380613):2.1999846,288:52.82119913):2.861895733,((289:31.46349862,  
(290:19.25999889,291:19.25999889,292:19.25999889,(293:4.899916829,294:4.899916829):  
14.36008206):12.20350073):11.85203092,295:43.31552954):12.36756532):  
3.638315925,296:59.32141179):3.729328892,((297:13.30703003,298:13.30703003,  
(299:6.982057339,300:6.982057339):6.324972695):11.9401807,301:25.24721074):37.80352994):  
16.82662,((302:19.60045216,303:19.60045216,304:19.60045216,305:19.60045216,306:19.60045216):  
25.96167059,(307:25.79604409,308:25.79604409,(309:16.82459787,  
(310:7.060801809,311:7.060801809,312:7.060801809,313:7.060801809,314:7.060801809,315:7.06080180  
9):9.763796059):8.971446221):19.76607866):34.31523893):2.481170827,  
(316:42.70828083,317:42.70828083,318:42.70828083,319:42.70828083):39.65025167):6.047678714):  
13.37702296,  
((((320:54.69461771,321:54.69461771,322:54.69461771,323:54.69461771,324:54.69461771,  
(325:5.26032653,326:5.26032653,327:5.26032653,328:5.26032653):49.43429017,  
(329:14.87665066,(((330:3.002865935,331:3.002865935,332:3.002865935,  
(333:1.016982575,334:1.016982575):1.98588336,335:3.002865935):3.595326819,336:6.598192755):  
2.051546307,337:8.649739062):2.717809616,  
(338:3.542634198,339:3.542634198,340:3.542634198,341:3.542634198):7.824914481):3.509101978):  
11.52403621,342:26.40068686):9.025706579,(343:25.44317224,((344:13.9914827,  
(345:8.675637157,346:8.675637157):5.315845544):6.95307512,((347:9.650512569,  
(348:3.26667561,349:3.26667561,350:3.26667561):6.38383696):7.386883443,351:17.03739601):  
3.90716081):4.498615418):9.983222204):2.938820819,(352:28.30282897,  
(353:11.63908665,354:11.63908665,355:11.63908665,356:11.63908665):16.66374233):10.06238529):  
5.674447657,(357:36.94208518,((358:28.01759643,((359:4.901071188,360:4.901071188):  
10.62713395,361:15.52820514):9.432330689,(362:10.25890228,  
(363:7.511858038,364:7.511858038,365:7.511858038,366:7.511858038,367:7.511858038,368:7.51185803  
8):2.74704424):14.70163355):3.057060599):3.396144512,369:31.41373994):5.528345238,  
(370:25.83988976,(371:13.89249504,372:13.89249504):11.94739472):11.10219542):7.097576742):  
5.082438481,(373:1.682351545,374:1.682351545):47.43974886):5.572516304):19.35328289,

(375:65.77161068,(376:43.30721329,377:43.30721329,  
(378:16.08819926,379:16.08819926,380:16.08819926):27.21901403):22.46439839):8.27628891):  
14.16472567,(((381:36.2142057,((382:8.8455125,383:8.8455125):10.66308947,(384:14.91521807,  
(385:11.16363657,((386:1.516210646,387:1.516210646):3.789844925,388:5.306055571):5.857581):  
3.751581497):4.593383899):16.70560373):4.342499027,  
(389:6.508922881,390:6.508922881,391:6.508922881):34.04778184):22.98819602,  
((392:36.90293633,393:36.90293633,394:36.90293633,395:36.90293633,  
(396:26.22383427,397:26.22383427):10.67910205):17.74048885,(398:7.322722774,399:7.322722774):  
47.3207014):8.901476567):3.49135323,(400:48.0589571,401:48.0589571):18.97729787):  
11.39403985,402:78.43029482):9.782331441):5.390932824,403:93.60355909):8.179674085):  
4.583488542,(((404:72.64558761,(((405:18.31412902,406:18.31412902,407:18.31412902):  
15.56672557,((408:13.478116,409:13.478116):7.589831919,410:21.06794792):12.81290767):  
10.79470977,411:44.67556436):10.4837698,412:55.15933416):12.47587102,(413:22.31412656,  
(414:5.421263816,415:5.421263816):16.89286275):45.32107862):5.010382425):5.582277977,  
(416:74.57484754,((417:59.01154719,418:59.01154719,  
(419:6.240768702,420:6.240768702,421:6.240768702,422:6.240768702,  
(423:3.986635651,424:3.986635651,425:3.986635651,426:3.986635651,427:3.986635651,428:3.986635651,  
1,429:3.986635651,430:3.986635651):2.254133051,431:6.240768702):6.082026127,432:12.32279383):  
46.68875336,433:59.01154719):12.61382631,((434:63.90136148,(435:36.66829616,  
(436:19.62539118,437:19.62539118):17.04290598):27.23306532,438:63.90136148):4.294580976,  
(439:17.52965569,440:17.52965569):50.66628677):3.429431046):2.949474043,441:74.57484754):  
3.653018043):3.166340141,((442:26.40341798,(443:21.31834448,444:21.31834448):5.085073501):  
45.01070162,(445:1.249891865,446:1.249891865):70.16422773):9.980087135):  
10.77919718,447:92.17340291):14.19331881):2.79746386,((448:23.19889089,449:23.19889089):  
63.64005923,450:86.83895012):22.32523546):6.568066987,((451:66.40474112,  
(452:31.35104592,453:31.35104592,  
(454:4.92343289,455:4.92343289,456:4.92343289):26.42761303):14.80943336,  
(458:37.28236291,(459:29.38564216,(460:24.17982168,461:24.17982168,462:24.17982168):  
5.205820477):7.896720753,463:37.28236291):8.878116374):20.24426183):18.41688102,  
(464:17.04595141,465:17.04595141,466:17.04595141,467:17.04595141):43.01750437,  
(468:34.18120527,(469:22.46766312,470:22.46766312):11.71354215):19.80650931,  
((471:1.38212818,472:1.38212818):28.71111333,  
(473:7.155259068,474:7.155259068,475:7.155259068):22.93798344):18.5858485,476:48.67909001):  
5.308624561):6.075740205):24.75816735):30.91063043):3.712025073,477:119.4442786):  
1.735498938,478:121.1797776):2.025749348,((479:39.65778869,(480:32.7755027,481:32.7755027):  
6.882285988):14.61626613,(482:35.54831907,483:35.54831907):18.72573576):65.46712751,  
(484:58.76173013,485:58.76173013,486:58.76173013):59.42458595,(((487:71.37483383,  
(488:26.4313561,489:26.4313561,490:26.4313561,491:26.4313561,492:26.4313561,493:26.4313561,  
(494:13.63678796,495:13.63678796,496:13.63678796,497:13.63678796,498:13.63678796,499:13.63678796,  
5,500:13.63678796,501:13.63678796,502:13.63678796,503:13.63678796,504:13.63678796):  
12.79456914):36.12658644,(505:52.01019692,506:52.01019692,507:52.01019692,508:52.01019692,  
(509:36.38161378,(((510:9.304186818,(511:5.9282504,512:5.9282504,(513:3.744626157,  
(514:0.9143944828,515:0.9143944828,516:0.9143944828,517:0.9143944828):2.830231674):  
2.183624244):3.375936418):3.303156833,518:12.60734365):4.57090662,  
(519:2.511990192,520:2.511990192):14.66626008):6.594879412,(521:19.5971149,(522:14.1335265,  
(523:6.485511072,524:6.485511072):7.648015433):5.463588393):4.176014785):  
3.850691075,525:27.62382076):5.312967798,(526:23.67091649,  
(527:16.34599434,528:16.34599434,529:16.34599434):7.324922151):9.265871063):3.444825222):  
15.62858314,530:52.01019692):10.54774562):8.816891286):2.672426395,  
(531:26.27289362,532:26.27289362):16.45094411,533:42.72383773):31.32342249):12.82493593,  
(534:33.75915125,(((535:7.357983579,536:7.357983579):10.37079069,(537:12.85180155,  
(538:8.866454926,(539:6.98491806,540:6.98491806,541:6.98491806):1.881536866):3.985347627):  
4.87697172):7.739263459,(542:6.575421622,543:6.575421622):18.89261611):8.29111352):  
30.23881699,544:63.99796824):22.87422891):8.752825889,(((545:41.7150917,546:41.7150917,  
(547:15.8139709,548:15.8139709,(549:12.45437047,(550:9.48756072,(551:6.798143436,  
(552:3.773057779,553:3.773057779):3.025085657):2.689417284):2.966809751):3.359600429,  
(554:8.501038659,555:8.501038659):7.312932241):25.9011208,((556:6.164277799,557:6.164277799):  
28.83434138,((558:12.77872128,559:12.77872128,560:12.77872128,  
(561:7.454472577,562:7.454472577):5.324248706):8.378313119,((563:4.617144255,564:4.617144255):  
5.984542097,565:10.60168635):10.55534805):13.84158478):6.716472516):22.88300898,  
((566:8.367507865,567:8.367507865):3.464044908,(568:8.089767958,569:8.089767958):  
3.741784815):26.9860148,(((570:6.990369505,571:6.990369505,572:6.990369505,573:6.990369505):  
3.906221468,574:10.89659097):7.061463627,(575:9.900530116,576:9.900530116,577:9.900530116):  
8.057524485):20.85951197):12.14744867,  
(578:28.85261478,579:28.85261478,580:28.85261478,581:28.85261478,582:28.85261478,583:28.85261478,  
(584:2.641993006,585:2.641993006):26.21062177):22.11240146):13.63308544):1.485086029,  
(586:40.17321516,(587:28.54548543,(588:15.68712992,  
(589:9.225098529,590:9.225098529,591:9.225098529,592:9.225098529):6.462032394):

12.8583555,593:28.54548543):11.62773074):9.834006345,  
(594:19.34274234,595:19.34274234,596:19.34274234,597:19.34274234,598:19.34274234):9.747822047,  
(599:14.66806454,  
(600:7.624707966,601:7.624707966,602:7.624707966,603:7.624707966,604:7.624707966,605:7.624707966  
6,606:7.624707966,607:7.624707966,608:7.624707966,609:7.624707966,610:7.624707966,611:7.624707966  
66,612:7.624707966,613:7.624707966,614:7.624707966,(615:2.186391809,616:2.186391809):  
5.438315157,617:7.624707966):7.043356575):14.42249984):20.91665713):16.0759652):29.54183534):  
9.541704314,  
((((618:25.11050807,619:25.11050807,620:25.11050807,621:25.11050807,622:25.11050807,623:25.11  
050807,624:25.11050807,(625:17.71302718,(626:14.1077733,627:14.1077733,  
(628:5.702507216,629:5.702507216,630:5.702507216,631:5.702507216):5.852573187,  
(632:5.840345903,633:5.840345903,634:5.840345903,635:5.840345903,636:5.840345903,637:5.84034590  
3,638:5.840345903,639:5.840345903,640:5.840345903,641:5.840345903,642:5.840345903,643:5.8403459  
03,644:5.840345903,645:5.840345903,646:5.840345903,647:5.840345903,648:5.840345903,649:5.840345  
903,650:5.840345903,651:5.840345903,652:5.840345903,653:5.840345903,654:5.840345903,655:5.84034  
5903,656:5.840345903,657:5.840345903,658:5.840345903,659:5.840345903,660:5.840345903,661:5.8403  
45903,662:5.840345903,663:5.840345903,664:5.840345903,665:5.840345903,666:5.840345903,667:5.840  
345903,668:5.840345903,669:5.840345903,670:5.840345903,671:5.840345903,672:5.840345903,673:5.84  
0345903,674:5.840345903,675:5.840345903,676:5.840345903,677:5.840345903,678:5.840345903,679:5.8  
40345903,680:5.840345903,681:5.840345903,682:5.840345903,683:5.840345903,684:5.840345903,685:5.  
840345903,686:5.840345903,687:5.840345903,688:5.840345903,689:5.840345903,690:5.840345903,691:5.  
840345903,692:5.840345903):5.7147345):2.552691897):3.605253881):2.765214892,693:20.47824207):  
4.632265997):23.48226397,(694:24.70825548,695:24.70825548,696:24.70825548):23.88451656):  
21.50057579,(697:41.77575327,698:41.77575327,699:41.77575327,(700:10.18490559,  
(701:1.992386919,702:1.992386919):8.19251767):31.59084768):28.31759456):10.25035682,  
(703:34.97275012,(704:25.41054699,705:25.41054699,706:25.41054699,707:25.41054699):  
9.562203129):10.431912,708:45.40466212):12.49950357,(709:28.89900998,  
(710:3.283695514,711:3.283695514,712:3.283695514):25.61531447):29.00515571):22.43953896):  
8.670920225,(713:83.68051236,(714:28.25763521,(715:19.7486736,  
(716:5.921499109,717:5.921499109):13.82717349,718:19.7486736):8.50896161):55.42287715):  
5.334112526):12.81535431,(719:9.344709258,720:9.344709258):92.48526993):3.336747168):  
6.402876234,((((721:14.81598436,  
(722:4.617988389,723:4.617988389,724:4.617988389,725:4.617988389):10.19799598):  
8.441376673,726:23.25736104):47.4855251,727:70.74288613):9.648789435,((((728:51.79936383,  
(729:34.29401383,730:34.29401383):17.50534899):10.28150431,731:62.08086814):3.391662707,  
(732:37.34065539,733:37.34065539,734:37.34065539,(735:25.8132525,  
(736:7.690679855,737:7.690679855):8.514448799,738:16.20512865):9.608123841):11.52740289):  
28.13187546):6.233423025,(739:51.07964449,  
(740:16.70240459,741:16.70240459,742:16.70240459,743:16.70240459,744:16.70240459,745:16.70240  
459,746:16.70240459,747:16.70240459):15.87785227,748:32.58025686):12.18596437,  
(749:20.85598348,(750:12.19136941,751:12.19136941,752:12.19136941,753:12.19136941):  
8.664614071):7.305228672,(754:16.35699399,755:16.35699399):11.80421817):10.97098347,  
(756:28.15716127,757:28.15716127,758:28.15716127,759:28.15716127,760:28.15716127,761:28.15716127  
7,(762:21.39841204,763:21.39841204,764:21.39841204):6.75874923,765:28.15716127):10.97503436):  
5.634026613):6.313422254,(766:45.00155566,  
(767:16.80865888,768:16.80865888,769:16.80865888,770:16.80865888,771:16.80865888):28.19289678):  
6.078087836):14.95948047,((((772:11.71239541,773:11.71239541,774:11.71239541):  
4.906946574,775:16.61934198):25.10977169,(776:18.17643253,777:18.17643253):23.55268214):  
7.661147698,778:49.39026236):16.6488626):5.666828911):3.314085847,  
(779:53.00014926,780:53.00014926,781:53.00014926,782:53.00014926,783:53.00014926,  
(784:9.097238094,(785:6.458178868,786:6.458178868):2.639059225,787:9.097238094):22.15855852,  
(788:10.61184347,789:10.61184347,790:10.61184347,791:10.61184347,  
(792:7.220469688,793:7.220469688):3.391372784):14.07065697,  
(794:7.322479673,795:7.322479673,796:7.322479673):17.36001977):6.573297175):21.74435265):  
22.01989046):2.766975781,((((797:47.82851277,798:47.82851277,799:47.82851277,(800:26.94304133,  
(801:21.59853502,802:21.59853502):5.344506308):8.920167383,803:35.86320871):11.96530406):  
22.38282365,(804:32.89074176,(805:21.02691068,  
(806:8.482992848,807:8.482992848,808:8.482992848,(809:2.771747658,810:2.771747658,  
(811:0.8943173331,812:0.8943173331):1.877430324):5.71124519):12.54391783):11.86383108):  
25.54210988,(813:17.84047338,814:17.84047338,815:17.84047338):40.59237826):11.77848378):  
2.654552116,816:72.86588753):4.921127969):2.604660069):13.76529774,  
(817:61.45875686,818:61.45875686,819:61.45875686,820:61.45875686,  
(821:32.20955377,822:32.20955377,823:32.20955377,  
(824:23.13168638,825:23.13168638,826:23.13168638):9.077867388):8.29579104,(827:13.31193701,  
(828:11.32524875,829:11.32524875,830:11.32524875):1.986688263,831:13.31193701):27.1934088):  
20.95341104):32.69821545):2.421532776,(832:23.52349697,833:23.52349697,834:23.52349697,  
(835:9.43401363,836:9.43401363):9.043776466,(837:13.11372436,838:13.11372436):5.364066739):  
5.045705876):73.05500911):6.823041074,

((839:80.4899083,840:80.4899083,841:80.4899083,842:80.4899083,843:80.4899083,844:80.4899083,845:80.4899083,846:80.4899083,((847:3.644549011,848:3.644549011,849:3.644549011):16.8849156,(850:11.8236229,(851:7.550923621,852:7.550923621):4.272699278):8.705841714):49.06200881,(853:22.1109525,854:22.1109525):47.48051992):10.89843588,((855:74.03367678,(((856:59.27655536,(857:32.87523378,(858:23.37581849,859:23.37581849,860:23.37581849):9.499414288):13.50785038,861:46.38308417):12.89347119):6.08280727,((862:22.28011537,(863:8.170158493,864:8.170158493,865:8.170158493):14.10995688):41.53890125,((866:19.87183094,(867:10.98061896,868:10.98061896,869:10.98061896):8.891211981):34.16164504,(870:36.72393466,871:36.72393466,872:36.72393466,(873:28.98908351,(874:9.429646241,875:9.429646241):10.28635363,876:19.71599887):9.273083633):7.734851156):7.693800138,(((877:18.67659004,878:18.67659004):12.04400572,879:30.72059475):5.839693512,880:36.56028826):7.857446538):9.615741181):6.282960265,((881:52.77284803,(((882:19.38072462,(883:5.196204884,884:5.196204884):7.384419457,885:12.58062334):6.80010128,(886:6.327028543,(887:2.371279394,888:2.371279394,889:2.371279394):3.955748149):13.05369708):6.253988316,890:25.63471294):7.165257658,(891:18.21369151,892:18.21369151,893:18.21369151,(894:9.694637188,895:9.694637188,896:9.694637188):8.519053319):14.58627909):8.782225622,897:41.58219622):7.379667056,(898:25.24215339,899:25.24215339):23.71970988):3.810984763):1.781274063,900:54.5541221):5.76231515):3.50257938):1.540345998):2.715147793,(901:56.99563109,902:56.99563109):11.07887933):2.052684216,903:70.12719463):3.906483144,(904:53.23286331,905:53.23286331,((906:28.47912025,907:28.47912025,908:28.47912025):11.32222025,(909:31.79135808,910:31.79135808,(911:25.29973225,(912:13.40035429,913:13.40035429,914:13.40035429,915:13.40035429,916:13.40035429):6.600480406,(917:11.59576502,918:11.59576502,919:11.59576502,920:11.59576502,(921:5.887744387,(922:2.846538282,923:2.846538282):3.041206105):5.708020634,((924:4.0437457,925:4.0437457,(((926:0.658279434,927:0.658279434):1.03658857,928:1.694868004):0.6436850987,929:2.338553103):0.764196489,930:3.102749592):0.9409961078,931:4.0437457):2.123121711,932:6.166867411):1.586829019,(933:1.96117422,934:1.96117422):5.79252221):3.842068591):8.405069678):5.29889655):6.491626832):8.009981418):6.831076882,(935:36.73021711,(936:3.324341191,937:3.324341191):33.40587592):9.90219927):6.600446932):20.80081346):3.917380847,938:77.95105763):2.538851679):5.492605402,939:85.98251471):13.22369978,(((940:44.87025055,(941:1.570552671,942:1.570552671,943:1.570552671,944:1.570552671):43.29969788,(((945:14.77416472,946:14.77416472):6.024615647,947:20.79878037):12.07945351,((948:22.35097109,(949:17.01311542,950:17.01311542,(951:12.33014537,(952:4.375621476,953:4.375621476):7.954524893):4.682970054):5.33785567):3.55568477,(954:4.114147963,955:4.114147963):21.7925079):6.971579017):11.99201567):2.354260595,(956:19.21691947,957:19.21691947):28.00759167):5.306910767,(958:30.00953902,959:30.00953902,960:30.00953902,961:30.00953902):22.52188289):8.364396048,(962:51.22002187,(963:29.28718218,964:29.28718218,965:29.28718218):21.93283969):9.675795088):11.9156729,((966:27.78785546,967:27.78785546):29.22579681,(968:32.39628945,969:32.39628945,970:32.39628945):24.61736282):5.516428857,971:62.53008113):10.28140874):8.656069832,(972:58.68338659,(973:1.398121891,974:1.398121891):42.5944427,(975:20.99620295,976:20.99620295,(977:4.691839274,(978:2.332160285,979:2.332160285):2.35967899):16.30436368):22.99636064):14.69082299,((980:28.07374307,(981:9.89646299,982:9.89646299,983:9.89646299,984:9.89646299,985:9.89646299):13.81276715,(986:1.116847404,987:1.116847404):17.90608256,988:19.02292997):4.686300168):4.364512929,989:28.07374307):5.802825078,(990:25.40043988,(991:20.78294697,992:20.78294697,993:20.78294697,994:20.78294697):4.617493912):8.476127261):15.76150571,995:49.63807286):9.045313731):22.78417311):10.64013843,(996:46.84314815,997:46.84314815,998:46.84314815):39.21158566,(999:19.00753604,1000:19.00753604):48.2174899,(((1001:3.196031979,1002:3.196031979):5.387054276,1003:8.583086255):24.80716013,(1004:11.66546475,1005:11.66546475,1006:11.66546475,1007:11.66546475,1008:11.66546475,(1009:4.691862838,1010:4.691862838):6.973601912,(1011:10.42632581,(1012:8.615324198,(1013:6.811011377,(1014:4.773202585,((1015:0.9002295856,1016:0.9002295856):1.993361602,1017:2.893591187):1.879611398):1.266638636,1018:6.039841221):0.7711701565):0.8382205196,1019:7.649231897):0.9660923016):1.811001613,1020:10.42632581):1.239138939):21.72478164):14.05093378,((1021:29.78718897,(1022:2.232112872,1023:2.232112872):27.5550761):4.495575951,(1024:18.96972465,((1025:2.446583955,1026:2.446583955,1027:2.446583955):6.638875003,1028:9.085458958):9.884265688):15.31304027):13.15841525):19.78384677):18.82970788):6.05296431):7.098517364):4.195331669):8.168055434):6.616713486):1.554866256):3.464344586):2.204504414):14.629206355):5.574033592):4.546430381):4.206866653):15.08824141):1.640417689):13.7266228):190.465915):90.98179901,(((1029:77.39983943,1030:77.39983943):65.78825846,(((1031:33.54827254,1032:33.54827254):54.60651392,((1033:52.4638625,(1034:35.43834591,1035:35.43834591):17.02551659):3.504818171,(1036:38.79705528,1037:38.79705528,1038:38.79705528,1039:38.79705528):17.17162439):15.30971225,(1040:41.86086259,1041:41.86086259):29.41753033):16.87639353):17.08293709,(((1042:24.51127267,1043:24.51127267):49.14366649,(1044:42.25394414,(1045:25.56859878,1046:25.56859878):16.68534535,(1047:20.98644152,1048:20.98644152,

(1049:8.808521296,1050:8.808521296):12.17792022,(1051:15.1511049,1052:15.1511049):5.835336615):  
21.26750262):31.40099502):18.10543139,(1053:55.14470573,(1054:15.36814984,1055:15.36814984):  
39.77655589):36.61566482):13.477352):37.95037434):39.17419901,1056:182.3622959):  
60.3397778,1057:242.7020737):57.2375067,1058:299.9395804):154.3299838);  
END;
